# Supplementary material for: Decoding the role of mycobacterial lipid remodelling and membrane dynamics in antibiotic tolerance
Source: Royal Society of Chemistry journal article supplement (doi:10.1039/d4sc06618a), 2024-01-01
Supplement: d4sc06618a2.xlsx [file d4sc06618a2.xlsx]

## Sheet: Table S1
Supplementary Table S1. Lipid amount (nmol) and mol% of individual lipid species of global lipidome in different membrane layers across the cell wall of Msm across growth stages
			nmol												mol%
Class	SubClass	Molecular Formula	OML 0.8 n1	OML 0.8 n2	OML 0.8 n3	OML 3.0 n1	OML 3.0 n2	OML 3.0 n3	IML 0.8 n1	IML 0.8 n2	IML 0.8 n3	IML 3.0 n1	IML 3.0 n2	IML 3.0 n3	OML 0.8 n1	OML 0.8 n2	OML 0.8 n3	OML 3.0 n1	OML 3.0 n2	OML 3.0 n3	IML 0.8 n1	IML 0.8 n2	IML 0.8 n3	IML 3.0 n1	IML 3.0 n2	IML 3.0 n3	Unsaturation	Chain Length
GhPL	LPA	C15H29O7P	0	0	0	0	0	0	9.45202	0	0	0	0	0	0	0	0	0	0	0	0.0623974	0	0	0	0	0	1	12
		C16H31O7P	0	0	0	0	0	0	0	0	0	31.5363	22.015	0	0	0	0	0	0	0	0	0	0	0.247448	0.179273	0	1	13
		C17H33O7P	0	0	0	0	0	0	0	0	0	0	0	1468.15	0	0	0	0	0	0	0	0	0	0	0	0.0427591	1	14
		C17H35O7P	3.03688	10.7634	0	3.3639	21.1111	3.2115	123.811	10.9201	0	104.872	153.015	0	0.0108691	0.0549071	0	0.0167604	0.112082	0.0239876	0.81734	0.0894632	0	0.822873	1.24603	0	0	14
		C18H37O7P	6.33762	9.31834	0	107.633	35.6621	0	22.277	124.481	0	6.25391	87.7318	0	0.0226826	0.0475353	0	0.536275	0.189335	0	0.147061	1.01981	0	0.0490708	0.714417	0	0	15
		C19H39O7P	0	0	0	46.2986	95.98	0	0	0	0	0	0	550.439	0	0	0	0.23068	0.50957	0	0	0	0	0	0	0.0160313	0	16
		C20H39O7P	0	0	0	0	30.4598	0	0	0	0	0	0	0	0	0	0	0	0.161715	0	0	0	0	0	0	0	1	17
		C20H41O7P	0	0	0	364.164	250.331	0.634088	0	0	0	0	0	0	0	0	0	1.81442	1.32904	0.00473618	0	0	0	0	0	0	0	17
		C21H39O7P	0	0	0	32.8003	359.492	0	0	0	0	0	0	5379.34	0	0	0	0.163425	1.90859	0	0	0	0	0	0	0.156671	2	18
		C21H41O7P	0	0	0	0	0	0	0	0	0	2198.44	0	0	0	0	0	0	0	0	0	0	0	17.2499	0	0	1	18
		C21H43O7P	0	0	0	0	0	0	0	0	0	0	0	3100.78	0	0	0	0	0	0	0	0	0	0	0	0.0903087	0	18
		C23H45O7P	0	0	0	0	0	0	0	19.3579	0	0	0	0	0	0	0	0	0	0	0	0.15859	0	0	0	0	1	20
		C23H47O7P	66.7354	4.8034	125.525	31.3368	438.611	112.642	0	0	0	158.196	7.098	220.52	0.238849	0.0245034	1.60006	0.156134	2.32864	0.841357	0	0	0	1.24127	0.0578004	0.00642253	0	20
		C24H47O7P	0	0	0	0	0	0	0	0	0.675065	6.8043	107.668	0	0	0	0	0	0	0	0	0	0.0054077	0.0533895	0.876762	0	1	21
		C24H49O7P	18.3301	61.3984	0	72.1782	2.73955	0	0	0	0	0	0	0	0.0656041	0.313209	0	0.359624	0.0145446	0	0	0	0	0	0	0	0	21
		C25H39O7P	0	0	0	0	0	0	0	0	1.95649	0	0	294.672	0	0	0	0	0	0	0	0	0.0156727	0	0	0.00858217	6	22
		C25H49O7P	0	0	21.5863	0	0	0	0	0	0	0	0	0	0	0	0.275159	0	0	0	0	0	0	0	0	0	1	22
		C25H51O7P	0	0	0	27.2239	0	0	0	0	0	0	0	0	0	0	0	0.135642	0	0	0	0	0	0	0	0	0	22
		C26H51O7P	0	0	0	0	0	0	0	0	0	0	0	4687.21	0	0	0	0	0	0	0	0	0	0	0	0.136513	1	23
		C26H53O7P	0	0	0	0	0	0	3.83433	0	0	0	0	0	0	0	0	0	0	0	0.0253123	0	0	0	0	0	0	23
		C27H53O7P	90.7552	0	28.0628	0	0	10.3182	0	0	1.42974	0	0	8084.16	0.324817	0	0.357714	0	0	0.0770699	0	0	0.0114531	0	0	0.235447	1	24
		C27H55O7P	0	8.58188	0	0	0	0	0	4.51008	0	0	2213.48	0	0	0.0437784	0	0	0	0	0	0.0369489	0	0	18.0248	0	0	24
		C28H55O7P	83.9554	1933.04	0	7.31277	3.68184	0	0	0	0	70.0253	0	1318.9	0.30048	9.86094	0	0.0364355	0.0195474	0	0	0	0	0.549448	0	0.0384124	1	25
		C28H57O7P	16.3966	144.548	0	0	21.7999	56.341	7.08744	1.71077	1650.86	3.56269	2.34458	10795.7	0.058684	0.737376	0	0	0.115739	0.420827	0.0467877	0.0140155	13.2245	0.0279544	0.0190924	0.314419	0	25
		C29H57O7P	13.0584	0	6.98846	0	0	0	0	0	0	0	0	3261.46	0.0467368	0	0.0890815	0	0	0	0	0	0	0	0	0.0949884	1	26
		C30H59O7P	0	0	0	0	12.8125	0	4.79158	4.02895	0	0	53.3802	0	0	0	0	0	0.068023	0	0.0316316	0.0330073	0	0	0.434685	0	1	27
		C30H61O7P	0	0	0	0	22.0107	0	0	0	0	2.14476	5.98738	0	0	0	0	0	0.116857	0	0	0	0	0.0168287	0.0487564	0	0	27
		C31H61O7P	69.695	0	0	0	0	0	0	0	0	0	0	0	0.249442	0	0	0	0	0	0	0	0	0	0	0	1	28
		C32H63O7P	74.6036	0	0	0	0	0	6.12344	0	0	0	48.9441	0	0.26701	0	0	0	0	0	0.0404239	0	0	0	0.398561	0	1	29
		C33H67O7P	0	5.7473	0	0	0	0	0	0	0	0	0	0	0	0.0293185	0	0	0	0	0	0	0	0	0	0	0	30
		C34H67O7P	0	2.54699	0	0	0	0	0	0	0	0	0	0	0	0.0129929	0	0	0	0	0	0	0	0	0	0	1	31
		C34H69O7P	0	0	0	0	0	0	0	0	0	0	5.7969	0	0	0	0	0	0	0	0	0	0	0	0.0472053	0	0	31
		C35H69O7P	0	0	0	0	0	0	4.98359	166.256	0	0	0	0	0	0	0	0	0	0	0.0328991	1.36205	0	0	0	0	1	32
		C36H71O7P	0	0	1.99341	0	0	0	0	0	0.651838	0	0	1105.81	0	0	0.0254099	0	0	0	0	0	0.00522164	0	0	0.0322063	1	33
	LPE	C17H34NO7P	211.495	48.9867	23.8156	0	0	2.81503	0	0	0	0	0	0	0.75695	0.249894	0.303576	0	0	0.0210263	0	0	0	0	0	0	1	12
		C18H36NO7P	39.4863	141.412	0	0	0	0	0	0	0	0	0	0	0.141323	0.72138	0	0	0	0	0	0	0	0	0	0	1	13
		C18H38NO7P	15.775	16.3189	0	0	0	0	0	0	0	0	0	0	0.0564594	0.083247	0	0	0	0	0	0	0	0	0	0	0	13
		C19H38NO7P	17.4543	11.3894	78.7286	0	0	81.9645	0	0	453.77	0	0	119963	0.0624697	0.0581003	1.00355	0	0	0.612216	0	0	3.63499	0	0	3.49385	1	14
		C19H40NO7P	23.336	35.8639	55.4319	0	0	0	1.00952	0	16.8252	0	0	4790.09	0.0835207	0.182951	0.706587	0	0	0	0.00666434	0	0.134781	0	0	0.139509	0	14
		C20H40NO7P	18.5737	49.3814	0	0	0	0	0	0	0.184476	0	0	0	0.066476	0.251907	0	0	0	0	0	0	0.00147777	0	0	0	1	15
		C21H42NO7P	407.427	425.407	0	0	0	9.51678	7.60789	6.08132	104.804	20.966	20.7253	0	1.4582	2.17011	0	0	0	0.0710835	0.0502234	0.0498213	0.839551	0.164508	0.16877	0	1	16
		C21H44NO7P	0	0	0	0	0	0	269.266	265.279	712.846	62.868	53.8191	109794	0	0	0	0	0	0	1.77756	2.1733	5.71035	0.493289	0.43826	3.19769	0	16
		C22H44NO7P	8.91388	7.74109	6.94089	0	15.5432	31.7545	0	0	1.97502	0	0	0	0.0319032	0.0394893	0.088475	0	0.0825207	0.237183	0	0	0.0158212	0	0	0	1	17
		C22H46NO7P	0	0	0	0	0	0	0	0	11.2964	0	0	9693.88	0	0	0	0	0	0	0	0	0.090491	0	0	0.28233	0	17
		C23H46NO7P	0	0	1.15413	0	0	14.4407	101.555	148.154	732.741	19.026	27.697	40732.7	0	0	0.0147116	0	0	0.107862	0.670417	1.21376	5.86972	0.149286	0.225542	1.18632	1	18
		C23H48NO7P	0	0	0	0	0	0	0	0	24.7234	0	14.918	21797.3	0	0	0	0	0	0	0	0	0.19805	0	0.12148	0.634834	0	18
		C24H48NO7P	62.0489	52.1784	0	0	0	0	0	0	0	0	0	0	0.222076	0.266176	0	0	0	0	0	0	0	0	0	0	1	19
		C24H50NO7P	0	0	7.90335	0	0	0	0	0	321.683	0	0	50661	0	0	0.100743	0	0	0	0	0	2.57688	0	0	1.47548	0	19
		C25H50NO7P	1.46234	237.331	0	0	0	0	0	0	0	0	0	2329.07	0.00523378	1.21069	0	0	0	0	0	0	0	0	0	0.0678332	1	20
		C25H52NO7P	0	0	0	0	0	0	0	0	0.735409	0	0	0	0	0	0	0	0	0	0	0	0.00589109	0	0	0	0	20
		C26H52NO7P	35.6876	0	3.33228	0	0	0	0	0	42.4623	0	0	0	0.127728	0	0.0424763	0	0	0	0	0	0.34015	0	0	0	1	21
		C26H54NO7P	0	0	0	0	0	3.02511	0	0	11.9303	0	0	0	0	0	0	0	0	0.0225954	0	0	0.0955694	0	0	0	0	21
		C27H54NO7P	10.1508	107.278	0	0	0	0	0	0	0	0	0	0	0.0363303	0.547253	0	0	0	0	0	0	0	0	0	0	1	22
		C27H56NO7P	0	0	77.6382	0	0	0	8.86649	27.3843	28.4845	5.35039	5.92779	0	0	0	0.989649	0	0	0	0.058532	0.224346	0.228179	0.0419814	0.0482711	0	0	22
		C28H56NO7P	42.6635	13.5774	5.72028	0	0	0	0	0	0	0	0	0	0.152695	0.069262	0.0729161	0	0	0	0	0	0	0	0	0	1	23
		C29H58NO7P	147.18	0	0	0	0	0	0	0	0	0	0	0	0.526763	0	0	0	0	0	0	0	0	0	0	0	1	24
		C30H60NO7P	0	4.93855	136.99	0	8.55553	99.9788	0	0	164.526	0	0	42019.3	0	0.0251928	1.7462	0	0.0454224	0.74677	0	0	1.31796	0	0	1.22379	1	25
		C30H62NO7P	0	0	0	0	0	8.26725	0	0	0	0	0	0	0	0	0	0	0	0.0617504	0	0	0	0	0	0	0	25
		C31H62NO7P	81.8684	19.0984	20.2229	0	185.713	356.532	0	0	0	0	0	3406.37	0.29301	0.097426	0.25778	0	0.985974	2.66304	0	0	0	0	0	0.0992088	1	26
		C31H64NO7P	0	0	0	0	0	0	20.4415	0	0	0	0	0	0	0	0	0	0	0	0.134944	0	0	0	0	0	0	26
		C32H64NO7P	0	0	0	0	0	158.399	0	0	0	0	0	156.717	0	0	0	0	0	1.18312	0	0	0	0	0	0.0045643	1	27
		C32H66NO7P	0	0	0	8.05913	0	0	0	0	0	0	0	0	0	0	0	0.0401541	0	0	0	0	0	0	0	0	0	27
		C34H68NO7P	0	0	0	0	0	0	0	0	0	0	0	141.985	0	0	0	0	0	0	0	0	0	0	0	0.00413525	1	29
		C34H70NO7P	0	0	0	2.30788	0	0	0	0	0	0	0	0	0	0	0	0.0114989	0	0	0	0	0	0	0	0	0	29
		C35H70NO7P	0	0	2.7259	1.70598	380.026	0	0	0	0	0	0	0	0	0	0.0347469	0.00849995	2.0176	0	0	0	0	0	0	0	1	30
		C35H72NO7P	0	0	0	0	0	0	0	0	0	0	1.77582	0	0	0	0	0	0	0	0	0	0	0	0.0144609	0	0	30
		C37H76NO7P	13.4204	0	0	0	0	0	0	0	0	0	0	0	0.0480321	0	0	0	0	0	0	0	0	0	0	0	0	32
		C38H78NO7P	0	0	0	0	0	1.02582	0	0	0	0	0	0	0	0	0	0	0	0.00766217	0	0	0	0	0	0	0	33
	LPG	C18H37O9P	60.2043	2.18911	76.1263	158.553	5.87238	91.8639	34.5494	41.5004	295.303	0	63.3601	0	0.215474	0.0111672	0.970377	0.789982	0.0311772	0.686157	0.228078	0.339993	2.36557	0	0.515953	0	0	12
		C19H39O9P	0	45.1314	0	0	0	0	5.00942	0	0	0	0	0	0	0.230227	0	0	0	0	0.0330696	0	0	0	0	0	0	13
		C20H39O9P	0	6.17075	0	8.78098	138.757	0	14.5946	5.52962	0	62.6176	12.0579	0	0	0.0314786	0	0.0437507	0.736679	0	0.0963459	0.0453015	0	0.491324	0.0981901	0	1	14
		C20H41O9P	0	27.8093	0	0	0	4.74566	1.66887	0	0	0	0	0	0	0.141863	0	0	0	0.0354467	0.0110171	0	0	0	0	0	0	14
		C21H43O9P	20.5177	453.682	0	24.6645	4.00916	0	9.00156	10.53	0.684783	0	0	0	0.0734338	2.31435	0	0.122889	0.0212851	0	0.0594237	0.0862672	0.00548555	0	0	0	0	15
		C22H43O9P	0	0	0	0	0	7.11925	0	0	0.58217	0	0	0	0	0	0	0	0	0.0531756	0	0	0.00466355	0	0	0	1	16
		C22H45O9P	2605.07	1851.54	0	826.967	793.58	0	501.85	297.639	0.887619	1.10342	0	245615	9.32367	9.44518	0	4.12032	4.21322	0	3.31296	2.43841	0.0071104	0.00865794	0	7.15342	0	16
		C23H45O9P	0	0	0	14.3011	11.2099	0	0	0	0	0	0	0	0	0	0	0.0712542	0.0595146	0	0	0	0	0	0	0	1	17
		C24H49O9P	2.18405	2.46806	0	1.89797	0	0	0	0	0	0	0	0	0.00781681	0.0125902	0	0.00945652	0	0	0	0	0	0	0	0	0	18
		C25H49O9P	0	0	0	0	0	0	0	0	0	0	1.90858	0	0	0	0	0	0	0	0	0	0	0	0.015542	0	1	19
		C25H51O9P	0	0	0	0	0	3.46967	0	0	0	0	0	1143.73	0	0	0	0	0	0.025916	0	0	0	0	0	0.0333106	0	19
		C26H51O9P	0	0	0	0	0	0	0	0	7.15584	0	0	0	0	0	0	0	0	0	0	0	0.0573229	0	0	0	1	20
		C27H53O9P	398.332	10.0429	12.101	0	0	0	0	0	90.2394	0	0	0	1.42565	0.0512317	0.154251	0	0	0	0	0	0.722875	0	0	0	1	21
		C27H55O9P	0	0	0	0	0	0	0	13.3816	7.3113	9.75965	6.5757	1515.57	0	0	0	0	0	0	0	0.109629	0.0585682	0.0765784	0.0535472	0.0441402	0	21
		C28H55O9P	12.3983	5.94579	0	0	0	0	1.41932	2.09293	31.1649	3.55462	3.98218	3984.85	0.0443742	0.030331	0	0	0	0	0.00936965	0.0171464	0.249651	0.027891	0.0324277	0.116057	1	22
		C28H57O9P	0	805.159	0	0.638498	2.25055	0	0	0	0	15.2051	15.0253	0	0	4.10733	0	0.00318128	0.0119484	0	0	0	0	0.119306	0.122354	0	0	22
		C29H57O9P	0	0	0	0	0	0	0	0	0	0	0	1183.62	0	0	0	0	0	0	0	0	0	0	0	0.0344725	1	23
		C29H59O9P	4.10668	2.74378	6.48985	0	1.41212	3.84301	0	0	8.31018	0	0	0	0.014698	0.0139967	0.0827257	0	0.00749712	0.0287045	0	0	0.0665699	0	0	0	0	23
		C31H61O9P	0	0	15.6315	5.67848	0	0	0	0	8.15831	0	0	1143.75	0	0	0.199254	0.0282927	0	0	0	0	0.0653533	0	0	0.0333112	1	25
		C31H63O9P	0	10.8649	0	0	0	0	0	0	8.8066	0	0	0	0	0.0554248	0	0	0	0	0	0	0.0705465	0	0	0	0	25
		C32H63O9P	36.8627	0	0	0	6.59147	0	2.3102	9.62124	0	0	0	0	0.131933	0	0	0	0.0349949	0	0.0152507	0.0788222	0	0	0	0	1	26
		C32H65O9P	0	5.21152	0	0	23.5359	0	0	0	0	0	0	0	0	0.0265853	0	0	0.124955	0	0	0	0	0	0	0	0	26
	LPI	C22H41O12P	71.0601	1.63053	2.74499	1.84654	1.57093	12.5707	124.873	130.936	0	1.8888	1.97184	218.934	0.254327	0.00831777	0.0349903	0.00920029	0.00834028	0.0938941	0.824345	1.0727	0	0.0148204	0.016057	0.00637634	1	13
		C23H43O12P	0	0	0	108.063	217.542	3.91994	0	0	0	0	0	95.5599	0	0	0	0.538417	1.15496	0.0292791	0	0	0	0	0	0.00278314	1	14
		C23H45O12P	0	0	0	0	0	0	0	0	0	0	0	1612.37	0	0	0	0	0	0	0	0	0	0	0	0.0469596	0	14
		C24H47O12P	0	0	0	0	0	2.46944	0	0	0	0	0	0	0	0	0	0	0	0.0184449	0	0	0	0	0	0	0	15
		C25H47O12P	0	106.168	0	0	0	0	0	0	0	0	0	1221.06	0	0.541592	0	0	0	0	0	0	0	0	0	0.0355627	1	16
		C25H49O12P	5.22838	3.35728	0	0	0	0	17.9775	16.5589	74.165	1.68555	1.45511	3533.9	0.0187126	0.0171264	0	0	0	0	0.118678	0.135659	0.594109	0.0132255	0.0118493	0.102923	0	16
		C27H49O12P	4.78061	4.2072	0	0	0	0	10.4088	6.76539	0	0	0	0	0.01711	0.021462	0	0	0	0	0.0687133	0.0554256	0	0	0	0	2	18
		C27H51O12P	0	0	0	0	0	0	0	6.89176	20.0913	0	0	0	0	0	0	0	0	0	0	0.0564608	0.160944	0	0	0	1	18
		C27H53O12P	0	0	0	0	0	0	1.42943	0	0	0	0	1078.35	0	0	0	0	0	0	0.00943639	0	0	0	0	0.0314065	0	18
		C28H51O12P	8.29596	12.3267	0	0	0	0.326308	0	0	0	0	0	0	0.0296916	0.0628816	0	0	0	0.00243728	0	0	0	0	0	0	2	19
		C28H53O12P	7.20554	8.14497	0	3.83577	3.65164	0	20.6622	19.4042	0	15.5034	19.8877	0	0.0257889	0.0415496	0	0.0191115	0.019387	0	0.136401	0.158969	0	0.121646	0.16195	0	1	19
		C28H55O12P	0	0	0	0	0	3.90816	0	11.7386	46.737	0	3.05307	1958.7	0	0	0	0	0	0.0291912	0	0.0961687	0.374393	0	0.0248617	0.0570463	0	19
		C29H55O12P	0	0	0	156.86	0	1.12934	0	0	0	0	0	989.225	0	0	0	0.781546	0	0.00843536	0	0	0	0	0	0.0288107	1	20
		C30H57O12P	23.6016	121.08	21.2631	7.0618	108.259	2.12085	123.867	5.15361	37.9735	151.701	152.191	6042.41	0.084471	0.617659	0.271039	0.035185	0.574762	0.0158412	0.817705	0.042221	0.221317	1.19031	1.23932	0.175982	1	21
		C31H59O12P	162.672	0	0	17.1268	6.76376	62.0402	5.22343	0	0	101.832	0	431.749	0.58221	0	0	0.0853331	0.0359096	0.463396	0.0344824	0	0	0.799015	0	0.0125745	1	22
		C31H61O12P	0	0	0	0	0	0	0	133.632	11.3485	0	0	0	0	0	0	0	0	0	0	1.09478	0.304192	0	0	0	0	22
		C32H61O12P	0	0	0	184.422	0	1.92945	47.7336	0	36.7623	0	0	15419.5	0	0	0	0.918871	0	0.0144116	0.315113	0	0.294489	0	0	0.449084	1	23
		C32H63O12P	16.4523	14.5545	14.799	0	6.2449	0	0	0	9.69991	0	0	0	0.0588837	0.0742462	0.188641	0	0.033155	0	0	0	0.0909089	0	0	0	0	23
		C33H65O12P	56.1003	25.1314	0	1.84493	0	0	0	0	27.6279	0	0	0	0.200786	0.128202	0	0.00919227	0	0	0	0	0.089459	0	0	0	0	24
		C34H65O12P	1.53346	126.033	0	0	0	0	797.026	12.3107	0	0.971493	98.7767	0	0.00548834	0.642926	0	0	0	0	5.26156	0.100855	0	0.00762275	0.804358	0	1	25
		C35H65212P	0	0	24.9436	0	0	0	0	0	0	0	0	0	0	0	0.317954	0	0	0	0	0	0	0	0	0	1	26
		C37H73O12P	128.529	59.3312	0	0	11.9575	0	0	0	0	0	0	0	0.46001	0.302664	0	0	0.0634838	0	0	0	0	0	0	0	0	28
		C38H75O12P	5.83775	8.20527	22.7239	0	0	0	0	0	0	0	0	0	0.0208936	0.0418572	0.28966	0	0	0	0	0	0	0	0	0	0	29
		C40H77O12P	0	0	24.1603	0	0	9.09746	2.98219	5.85354	28.68	0	140.146	3129.72	0	0	0.307969	0	0	0.0679515	0.0196869	0.0479553	0.229745	0	1.14124	0.0911515	1	31
		C41H79O12P	4.0008	4.80528	0	0	0	150.997	0	0	11.1675	0	0	0	0.014319	0.024513	0	0	0	1.12784	0	0	0.0777025	0	0	0	1	32
		C42H83O12P	0	0	0	0	0	2.1887	0	0	0	0	0	0	0	0	0	0	0	0.016348	0	0	0	0	0	0	0	33
	PA	C27H51O8P	0	0	0	27.9899	0	0	0	0	12.1045	8.51643	12.7657	5076.55	0	0	0	0.139458	0	0	0	0	0.0969644	0.0668235	0.103954	0.147852	1	24
		C28H51O8P	0	0	0	0	35.7621	0	9.62448	10.0603	0	1.3426	2.65028	5135.32	0	0	0	0	0.189866	0	0.0635359	0.082419	0	0.0105346	0.0215817	0.149564	2	25
		C28H55O8P	0	0	0	0	0	0	0	0	0	0.376078	9.24345	0	0	0	0	0	0	0	0	0	0	0.00295087	0.0752712	0	0	25
		C29H57O8P	0	0	9.23248	0	0	0	0	0	4.52026	0	0	453.819	0	0	0.117686	0	0	0	0	0	0.0362102	0	0	0.0132173	0	26
		C30H57O8P	0	0	0	34.5414	0	0	0	0	0	0	0	0	0	0	0	0.1721	0	0	0	0	0	0	0	0	1	27
		C31H57O8P	0	0	0	0	0	3.42975	0	0	0	50.3281	20.2227	0	0	1.12962	0	0	0	0.0256178	0	0	0	0.394895	0.164677	0	2	28
		C32H59O8P	0	0	0	0	0	0	0	0	0	0	0	3074.9	0	0	0	0	0	0	0	0	0	0	0	0.0895551	2	29
		C32H61O8P	0.145508	0	90.8271	71.406	0	0	1532.78	22.0372	139.685	22.7264	82.295	0	0.000520781	0	1.15777	0.355776	0	0	10.1186	0.18054	1.11897	0.178321	0.670144	0	1	29
		C33H61O8P	0	0	0	0	0	0	0	0	5.32019	0	0	0	0	0	0	0	0	0	0	0	0.0426181	0	0	0	2	30
		C33H63O8P	2.73605	0	0	0	0	549.915	0	0	4.29126	0	0	0	0.00979245	0	0	0	0	4.10747	0	0	0.0343758	0	0	0	1	30
		C34H63O8P	0	0	0	5.08915	0	0	0	0	0	0	0	0	0	0	0	0.0253564	0	0	0	0	0	0	0	0	2	31
		C34H65O8P	4.49122	0	11.2934	64.944	0	0	9.99947	22.8285	0	683.064	0.937073	0	0.0160743	0	0.143956	0.32358	0	0	0.0660114	0.187022	0	5.35961	0.00763077	0	1	31
		C34H67O8P	22.4747	0.831523	0	0	0	0	0	0	0	0	0	0	0.0804379	0.00424181	0	0	0	0	0	0	0	0	0	0	0	31
		C35H69O8P	0	4.12917	0	0	0	0	0	0	0	0	0	0	0	0.021064	0	0	0	0	0	0	0	0	0	0	0	32
		C36H69O8P	0	1.40572	0	19.3723	0	0	0	0	0	0	0	0	0	0.00717095	0	0.0965211	0	0	0	0	0	0	0	0	1	33
		C36H71O8P	68.2317	52.9338	0	0	0	0	0	0	0	0	0	0	0.244204	0.270029	0	0	0	0	0	0	0	0	0	0	0	33
		C37H69O8P	0	0	0	0	0	0	0	0	2.8737	0	0	0	0	0	0	0	0	0	0	0	0.0230202	0	0	0	2	34
		C38H73O8P	0	4.90839	0	179.107	25.5359	0	0	0	0	0	0	0	0	0.025039	0	0.89239	0.135573	0	0	0	0	0	0	0	1	35
		C38H75O8P	102.618	0	0	0	22.4247	0	0	0	0	0	0	0	0.367274	0	0	0	0.119056	0	0	0	0	0	0	0	0	35
		C39H69O8P	0	0	0	0	0	3.68066	0	0	0	0	0	961.874	0	0	0	0	0	0.0274919	0	0	0	0	0	0.0280141	4	36
		C39H75O8P	0	0	0	2.39741	0	0	0	0	16.684	0	0	4031.59	0	0	0	0.011945	0	0	0	0	0.13365	0	0	0.117418	1	36
		C39H77O8P	173.476	0	0	0	0	0	0	0	0	0	0	0	0.620877	0	0	0	0	0	0	0	0	0	0	0	0	36
		C41H69O8P	473.596	0	0	0	0	0	0	0	43.0658	0	568.99	0	1.69502	0	0	0	0	0	0	0	0.344985	0	4.6334	0	6	38
		C41H71O8P	0	0	0	0	0	0	0	0	0	0	0	2072.41	0	0	0	0	0	0	0	0	0	0	0	0.060358	5	38
		C41H77O8P	0	0	1.94977	0	0	0	57.1029	1201.98	0	0	0	0	0	0	0.0248536	0	0	0	0.376964	9.84724	0	0	0	0	2	38
		C41H81O8P	0	0	0	0	0	0	0	0	0	29.6397	0	0	0	0	0	0	0	0	0	0	0	0.232566	0	0	0	38
		C42H79O8P	0	0	0	0	0	6.1673	0	0	0	0	0	0	0	0	0	0	0	0.0460653	0	0	0	0	0	0	2	39
		C42H83O8P	0	0	0	0	0	0	0	0	0	0	16.5777	0	0	0	0	0	0	0	0	0	0	0	0.134996	0	0	39
		C43H71O8P	0	0	0	0	0	5.81423	0	0	53.9822	0	0	0	0	0	0	0	0	0.0434281	0	0	0.432432	0	0	0	7	40
		C48H93O8P	0	0	0	0	0	0	25.4629	0	0	0	0	0	0	0	0	0	0	0	0.168093	0	0	0	0	0	1	45
		C49H93O8P	0	0	0	0	0	16.3956	0	0	2.45235	0	0	12551.6	0	0	0	0	0	0.122463	0	0	0.0196449	0	0	0.365559	2	46
		C52H99O8P	0	22.6651	0	0	0	0	0	0	0	0	0	0	0	0.115621	0	0	0	0	0	0	0	0	0	0	2	49
		C55H105O8P	0	0	0	0	0	0	0	0	0.183509	0	0	0	0	0	0	0	0	0	0	0	0.00147003	0	0	0	2	52
		C57H113O8P	0	0	0	0	0	0	0	0	0	0	0	113.042	0	0	0	0	0	0	0	0	0	0	0	0.0032923	0	54
		C59H115O8P	0	0	0.292606	0	0	0	0	0	0	0	0	0	0	0	0.00372982	0	0	0	0	0	0	0	0	0	1	56
		C60H119O8P	11.6947	0	0	0	0	0	0	0	0	0	0	0	0.0418559	0	0	0	0	0	0	0	0	0	0	0	0	57
		C61H119O8P	0	0	0	0	0	0	0	0	0	0	0	130.317	0	0	0	0	0	0	0	0	0	0	0	0.00379542	1	58
		C62H123O8P	0	0	8.41889	0	0	0	0	0	0	0	0	2759.91	0	0	0.107315	0	0	0	0	0	0	0	0	0.0803811	0	59
		C63H121O8P	0	0	0	0	0	0	0	0	0	0	0	268.338	0	0	0	0	0	0	0	0	0	0	0	0.0078152	2	60
		C64H123O8P	0	0	0	0	0	0	0	0	0	0	0	490.236	0	0	0	0	0	0	0	0	0	0	0	0.0142779	2	61
		C64H125O8P	0	0	0	0	0.687275	0	0	0	0	2.2295	0	0	0	0	0	0	0.00364883	0	0	0	0	0.0174936	0	0	1	61
		C64H127O8P	0	0	0.615715	0	0	0	0	0	0	0	0	0	0	0	0.00784848	0	0	0	0	0	0	0	0	0	0	61
		C65H127O8P	0	0	0	0	0	0	0	0	0	0.789148	0	1751.33	0	0	0	0	0	0	0	0	0	0.00619199	0	0.0510067	1	62
		C68H133O8P	0	19.5241	0	0	0	0	0	0	0	0	0	0	0	0.0995973	0	0	0	0	0	0	0	0	0	0	1	65
		C68H135O8P	0	0	0	0	0	0	0	0	0	0	0	17.6422	0	0	0	0	0	0	0	0	0	0	0	0.000513822	0	65
	PE	C29H54NO8P	0	10.4182	9.46113	11.9203	10.6052	31.9243	7.2103	2.04328	0	10.3239	1.24977	0	0	0.0531461	0.1206	0.0593923	0.0563042	0.238452	0.0475987	0.0167396	0	0.081006	0.0101771	0	2	24
		C29H56NO8P	31.1029	0	0	0	0	0	0	0	0	0	0	0	0.111319	0	0	0	0	0	0	0	0	0	0	0	1	24
		C30H56NO8P	0	0	0	0	0	0	0	0	12.1181	0	12.616	0	0	0	0	0	0	0	0	0	0.097074	0	0.102735	0	2	25
		C30H58NO8P	16.5585	0	0	0	0	0	0	0	3.99852	0	0	1804.42	0.0592637	0	0	0	0	0	0	0	0.0320307	0	0	0.0525528	1	25
		C31H58NO8P	0	0	0	0	0	7.1815	0	0	0	0	0	0	0	0	0	0	0	0.0536406	0	0	0	0	0	0	2	26
		C31H60NO8P	7.40255	0	0	67.7289	0	0	0	0	0	0	0	0	0.0264941	0	0	0.337455	0	0	0	0	0	0	0	0	1	26
		C32H64NO8P	384.441	238.614	4.86538	0	212.602	108.718	0	0	161.442	0	0.499089	42221.2	1.37593	1.21723	0.0620186	0	1.12873	0.812048	0	0	1.29325	0	0.00406418	1.3511	0	27
		C33H66NO8P	0	0	18.3464	0	426.554	73.3844	0	0	0	0	0	0	0	0	0.23386	0	2.26463	0.548129	0	0	0	0	0	0	0	28
		C34H66NO8P	0	0	0	0	0	0	0	0	0	0	0	5010.79	0	0	0	0	0	0	0	0	0	0	0	0.145937	1	29
		C34H68NO8P	0	0	0	0	0	94.5237	0	0	0	0	0	0	0	0	0	0	0	0.706024	0	0	0	0	0	0	0	29
		C36H70NO8P	11.5545	6.29815	0	25.961	0	0	0	0	0	0	9.36405	0	0.0413542	0.0321285	0	0.129349	0	0	0	0	0	0	0.0762533	0	1	31
		C37H70NO8P	0	0	15.2333	0	0	0	0	0	0	8.81956	0	0	0	0	0.194178	0	0	0	0	0	0	0.069202	0	0	2	32
		C37H72NO8P	0	0	0	0	0	0	0	0	19.6285	0	0	0	0	0	0	0	0	0	0	0	0.157237	0	0	0	1	32
		C37H74NO8P	5.60921	5.7103	10.8886	0	8.24593	0	0	2.63622	0	0	0	0	0.0200756	0.0291297	0.138797	0	0.0437787	0	0	0.0215973	0	0	0	0	0	32
		C39H74NO8P	0	0	0	0	0	0	0	0	0	66.3747	0	0	0	0	0	0	0	0	0	0	0	0.520805	0	0	2	34
		C39H76NO8P	4.50764	4.92108	0	6.29606	8.0113	0	2.23459	1.11325	0	0	0.990622	0	0.0161331	0.0251037	0	0.0313697	0.042533	0	0.0147516	0.00912035	0	0	0.00806683	0	1	34
		C39H78NO8P	0	0	23.0151	0	0	3.94261	0	0	3.72071	0	0	7822.87	0	0	0.293372	0	0	0.0294484	0	0	0.0298053	0	0	0.227837	0	34
		C40H76NO8P	0	0	0.575281	0	0	0	0	0	0	0	0	0	0	0	0.00733307	0	0	0	0	0	0	0	0	0	2	35
		C40H78NO8P	0	0	0.606619	0	0	0	0	0	0	0	0	0	0	0	0.00773253	0	0	0	0	0	0	0	0	0	1	35
		C40H80NO8P	0	0	1083.03	0	1.08315	757.542	0	0	57.6201	0	0	114449	0	0	13.8053	0	0.00575056	5.65829	0	0	0.461574	0	0	3.33327	0	35
		C41H78NO8P	0	3.31524	0	0	0	0	0	0	0	0	0	0	0	0.0169119	0	0	0	0	0	0	0	0	0	0	2	36
		C41H82NO8P	0	0	2.92214	0	0	52.7931	0	0	31.5178	0	0	3890.26	0	0	0.0372483	0	0	0.394326	0	0	0.252478	0	0	0.113302	0	36
		C42H82NO8P	0	0	22.4533	0	0	81.8442	0	0	57.3584	0	0	0	0	0	0.28621	0	0	0.611317	0	0	0.459477	0	0	0	1	37
		C42H84NO8P	0	0	5.52531	0	0	0	0	0	2.68653	0	0	4897.84	0	0	0.0704308	0	0	0	0	0	0.0215208	0	0	0.0967566	0	37
		C43H84NO8P	0	0	0.124176	0	0	0	0	0	0	0	0	0	0	0	0.00158286	0	0	0	0	0	0	0	0	0	1	38
		C43H86NO8P	0	0	6.52472	0	0	8.42428	0	0	8.33721	0	0	1230.2	0	0	0.0831702	0	0	0.0629233	0	0	0.0667864	0	0	0.0458908	0	38
		C44H84NO8P	0	0	660.195	0	0	883.526	0	0	0	0	0	268534	0	0	8.41546	0	0	6.5993	0	0	0	0	0	0.0358291	2	39
		C45H86NO8P	0	0	35.1894	0	0	6.81574	0	0	41.2381	0	0	5399.87	0	0	0.448557	0	0	0.0509087	0	0	0.330344	0	0	7.82092	2	40
		C45H90NO8P	0	0	2.82803	0	0	0	0	0	1.72336	0	0	0	0	0	0.0360487	0	0	0	0	0	0.0138052	0	0	0	0	40
		C46H90NO8P	0	0	0	0	0	0	0	0	0	0	0	7825.23	0	0	0	0	0	0	0	0	0	0	0	0.157269	1	41
		C46H92NO8P	0	0	3.44039	0	0	2.45744	0	0	10.3806	0	0	3997.25	0	0	0.0438545	0	0	0.0183553	0	0	0.0831557	0	0	0.227906	0	41
		C47H90NO8P	0	0	0	0	0	0	0	9.33629	0	0	15.6269	0	0	0	0	0	0	0	0	0.0764877	0	0	0.127253	0.116418	2	42
		C47H92NO8P	0	0	0	0	0	0	0	0	0	0	1.24789	0	0	0	0	0	0	0	0	0	0	0	0.0101618	0	1	42
		C47H94NO8P	0	0	0	0	0	0	0	0	0.321425	0	0	0	0	0	0	0	0	0	0	0	0.00257482	0	0	0	0	42
		C48H94NO8P	0	0	0	0	0	9.80929	11.0924	4.71286	34.1501	0	2.15407	9646.2	0	0	0	0	0	0.0732684	0.0732267	0.0386102	0.273564	0	0.017541	0.280941	1	43
		C49H94NO8P	0	0	0	0	0	0	0	11.8759	0	0	0	0	0	0	0	0	0	0	0	0.0972935	0	0	0	0	2	44
		C50H98NO8P	0	0	0	0	0	0	0	0	0.13381	0	0	38.9843	0	0	0	0	0	0	0	0	0.00107191	0	0	0.0011354	1	45
		C52H100NO8P	0	0	0	3.68324	0	0	0	0	0	2.72821	0	0	0	0	0	0.0183515	0	0	0	0	0	0.0214067	0	0	2	47
		C52H102NO8P	0	0	0	0	0	0.762727	0	0	0	0	0	0	0	0	0	0	0	0.00569702	0	0	0	0	0	0	1	47
		C56H110NO8P	0	0	0	0	0	0	3.07514	4.43844	0	0	0	0	0	0	0	0	0	0	0.0203005	0.036362	0	0	0	0	1	51
		C62H120NO8P	0	0	0	0	0	0	0	0	0.17701	0	0	0	0	0	0	0	0	0	0	0	0.00141796	0	0	0	2	57
		C62H122NO8P	0	0	0	0	0	0	97.4568	0	0	0	0	0	0	0	0	0	0	0	0.64336	0	0	0	0	0	1	57
		C64H126NO8P	0	0	0.37115	0	0	0	0	0	0	0	0	0	0	0	0.00473102	0	0	0	0	0	0	0	0	0	1	59
		C66H130NO8P	0	0	0	0	0	0	0	0	0.10327	0	0	0	0	0	0	0	0	0	0	0	0.000827262	0	0	0	1	61
		C68H132NO8P	0	0	0.0677637	0	0	0	0	0	0	0	0	0	0	0	0.00086378	0	0	0	0	0	0	0	0	0	2	63
	PG	C30H57O10P	7.30293	88.109	0	0	0	0	72.3689	16.5213	0	0	0	0	0.0261375	0.449467	0	0	0	0	0.477743	0.135351	0	0	0	0	1	24
		C30H59O10P	33.6201	47.4335	0	0	0	0	0	0	0	0	0	0	0.120328	0.241971	0	0	0	0	0	0	0	0	0	0	0	24
		C31H57O10P	0	0	0	0	41.0511	0	0	0	0	0	0	0	0	0	0	0	0.217946	0	0	0	0	0	0	0	2	25
		C32H61O10P	76.3898	5.19053	19.0551	0	0	0	0	0	0	0	0	0	0.273402	0.0264783	0.242894	0	0	0	0	0	0	0	0	0	1	26
		C32H63O10P	20.5699	7.33291	304.731	46.8796	2.21632	402.534	0	0	26.7726	24.8118	0	42989.7	0.0736204	0.0374071	3.88438	0.233575	0.0117667	3.00664	0	0	0.214466	0.194684	0	1.25205	0	26
		C33H61O10P	0	0	0	0	0	31.8145	0	0	6.10456	0	0	0	0	0	0	0	0	0.237632	0	0	0.0489014	0	0	0	2	27
		C33H65O10P	0	0	0	6.08545	5.58856	0	0	0	11.9918	0	0.268072	0	0	0	0	0.0303204	0.0296703	0	0	0	0.0960622	0	0.00218296	0	0	27
		C34H63O10P	0	0	0	0	0	34.561	0	0	0	0	0	0	0	0	0	0	0	0.258146	0	0	0	0	0	0	2	28
		C34H67O10P	31.8652	32.4317	0	0	0	0	0	87.8656	0	0	0	0	0.114047	0.165443	0	0	0	0	0	0.71984	0	0	0	0	0	28
		C35H69O10P	0	37.7529	0	0	0	0	0	0	0	0	0	0	0	0.192587	0	0	0	0	0	0	0	0	0	0	0	29
		C36H67O10P	0	14.3373	0	0	0	0	0	0	0	0	0	0	0	0.0731382	0	0	0	0	0	0	0	0	0	0	2	30
		C36H69O10P	332.288	0	78.6045	0	0	0	1398.5	1038.65	89.69	521.751	428.406	11223.7	1.18927	0	1.00197	0	0	0	9.23217	8.50918	0.718475	4.09388	3.48859	0.326885	1	30
		C37H71O10P	295.179	279.264	14.6897	0	0	0	0	0	0	0	0	0	1.05646	1.4246	0.187248	0	0	0	0	0	0	0	0	0	1	31
		C38H75O10P	6.20661	0	0	0	0	0	0	0	0	0	0	0	0.0222137	0	0	0	0	0	0	0	0	0	0	0	0	32
		C39H77O10P	0	4.38566	0	0	0	0	0	0	0	0	0	0	0	0.0223724	0	0	0	0	0	0	0	0	0	0	0	33
		C40H77O10P	27.9714	39.0137	0	63.3179	S	0	0	0	0	0	0	0	0.100111	0.199019	0	0.315478	0.347134	0	0	0	0	0	0	0	1	34
		C42H79O10P	0	0	6.45041	0	0	0	0	0	0	0	0	0	0	0	0.082223	0	0	0	0	0	0	0	0	0	2	36
		C42H81O10P	40.1194	43.5415	14.5751	70.5961	70.541	0	0	0	0	0	0	0	0.143589	0.222116	0.185787	0.351741	0.374511	0	0	0	0	0	0	0	1	36
		C44H83O10P	0	0	42.5118	0	0	0	0	0	0	0	0	0	0	0	0.541895	0	0	0	0	0	0	0	0	0	2	38
		C44H85O10P	7.34752	0	0	0	0	0	1.94962	0	0	0	0	0	0.0262971	0	0	0	0	0	0.0128704	0	0	0	0	0	1	38
		C45H85O10P	0	61.3245	0	0	0	0	0	0	0	0	0	0	0	0.312832	0	0	0	0	0	0	0	0	0	0	2	39
		C46H89O10P	0	0	0	0	1.01299	0	0	0	0	0	0	0	0	0	0	0	0.00537808	0	0	0	0	0	0	0	1	40
		C46H91O10P	0	0	0	0	0	13.9089	0	0	0	0	0	0	0	0	0	0	0	0.103889	0	0	0	0	0	0	0	40
		C47H93O10P	0	0	0	0	6.09605	0	0	0	0	0	0	0	0	0	0	0	0.0323647	0	0	0	0	0	0	0	0	41
		C48H91O10P	0	0	0	0	0	0	0	0	0	0	0	937.574	0	0	0	0	0	0	0	0	0	0	0	0.0273064	2	42
		C49H95O10P	6.28323	4.37163	0	0	0.696131	0	0	0	0	4.42451	0	0	0.022488	0.0223008	0	0	0.00369585	0	0	0	0	0.0347166	0	0	1	43
		C50H99O10P	0	0	0	0	1.58562	0	0	0	0	0	0	0	0	0	0	0	0.00841824	0	0	0	0	0	0	0	0	44
		C51H97O10P	0	0	0	0	9.88721	0	0	0	0	0	0	0	0	0	0	0	0.0524924	0	0	0	0	0	0	0	2	45
		C53H103O10P	0	0	0	12.5593	0	0	0	0	0	0	0	0	0	0	0	0.0625758	0	0	0	0	0	0	0	0	1	47
		C60H119O10P	0	0	0	0	0	0	0	0	0	0	3.25042	0	0	0	0	0	0	0	0	0	0	0	0.0264688	0	0	54
		C68H135O10P	0	0	0	0	0	0	0	0	0	2.9537	0	0	0	0	0	0	0	0	0	0	0	0.023176	0	0	0	62
		C71H139O10P	0	0	0.0714198	0	0	0	0	0	0	0	0	0	0	0	0.000910383	0	0	0	0	0	0	0	0	0	1	65
	PI	C33H59O13P	64.4184	75.574	0	27.4607	40.3072	0.452134	0	0	0	0	2.22384	0	0.230556	0.385523	0	0.136821	0.213996	0.00337711	0	0	0	0	0.0181091	0	2	24
		C33H61O13P	0	0	2.15447	5.15854	14.4426	0	0	0	0	0	241.982	0	0	0	0.0274628	0.0257021	0.0766777	0	0	0	0	0	1.9705	0	1	24
		C33H63O13P	0	0	0	71.1137	40.4964	53.6349	122.712	0	10.233	0	0	0	0	0	0	0.35432	0.215	0.400614	0.810085	0	0.0819727	0	0	0	0	24
		C34H61O13P	0	0	0	0	0	0	0	0	1.25999	0	0	0	0	0	0	0	0	0	0	0	0.0100933	0	0	0	2	25
		C34H63O13P	77.7427	94.9473	9.63834	13.278	2.78142	0	0	0	0	0	0	0	0.278245	0.484351	0.122859	0.0661569	0.0147669	0	0	0	0	0	0	0	1	25
		C34H65O13P	0	0	2.89728	0	174.029	16.0221	2.86192	160.404	377.949	225.996	89.7217	127936	0	0	0.0369315	0	0.923942	0.119674	0.0188929	1.31411	3.02762	1.77326	0.730621	3.72608	0	25
		C35H65O13P	34.3859	49.7534	0	2.2785	27.9802	0	0	0	0	8.03307	4.12061	0	0.123069	0.253805	0	0.0113525	0.14855	0	0	0	0	0.0630309	0.0335549	0	1	26
		C36H65O13P	0	0	0	0	0	0	0	0	0	2.1798	0	0	0	0	0	0	0	0	0	0	0	0.0171036	0	0	2	27
		C36H69O13P	123.857	27.5437	0	0	0	0	11.091	1.22072	0	2.10845	2.03892	0	0.443289	0.140508	0	0	0	0	0.0732169	0.0100007	0	0.0165438	0.0166033	0	0	27
		C37H67O13P	8.38936	0.910411	0	37.0332	3.05807	0	0	0	0	0	0	0	0.0300259	0.00464424	0	0.184516	0.0162357	0	0	0	0	0	0	0	2	28
		C37H69O13P	0	0	0	0	5.11654	0	0	0	0	0	0	0	0	0	0	0	0.0271644	0	0	0	0	0	0	0	1	28
		C38H69O13P	0	0	0	0	0	0	0	0	0	0.927069	0	0	0	0	0	0	0	0	0	0	0	0.00727418	0	0	2	29
		C38H71O13P	0	0	0	178.457	4.90917	0	0	0	2.56556	0	0	457.245	0	0	0	0.889154	0.0260634	0	0	0	0.0205518	0	0	0.013317	1	29
		C39H73O13P	0	0	0	0	0	0	0	0	0	0	0	1707.86	0	0	0	0	0	0	0	0	0	0	0	0.0497405	1	30
		C39H75O13P	0	0	0	0	0	0	0	0	0	3.03392	2.51086	0	0	0	0	0	0	0	0	0	0	0.0238054	0.0204464	0	0	30
		C40H77O13P	0	12.7629	0	0	0	0	0	0	0	0	0	0	0	0.0651067	0	0	0	0	0	0	0	0	0	0	0	31
		C41H75O13P	236.695	291.552	0	0	0	0	402.599	396.786	0	165.063	0	0	0.847143	1.48728	0	0	0	0	2.65775	3.25068	0	1.29516	0	0	2	32
		C41H77O13P	0	0	0	0	0	0	0	0	33.3183	3.02837	3.379	8811.95	0	0	0	0	0	0	0	0	0.266901	0.0237619	0.0275158	0.256644	1	32
		C41H79O13P	0	0	0	0	0	0	0	3.40843	0	0	0	8456.33	0	0	0	0	0	0	0	0.0279236	0	0	0	0.246287	0	32
		C42H79O13P	0	1.32839	0	0	0	0	0	0	0	0	0	0	0	0.00677644	0	0	0	0	0	0	0	0	0	0	1	33
		C42H81O13P	105.543	104.38	0	0	0	0	474.257	262.246	15.1144	0	0	1993.71	0.377743	0.532469	0	0	0	0	3.1308	2.14846	0.121076	0	0	0.0580659	0	33
		C43H75O13P	0	0	0	0	0	0	3.30823	0	0	0	0	0	0	0	0	0	0	0	0.0218392	0	0	0	0	0	4	34
		C43H79O13P	0	0	0	0	0	0	0	0	25.6517	0	3.79688	0	0	0	0	0	0	0	0	0	0.205487	0	0.0309188	0	2	34
		C43H81O13P	0	0	0	0	0	0	0	0	0	0	0	6662.24	0	0	0	0	0	0	0	0	0	0	0	0.194034	1	34
		C43H83O13P	17.6512	80.3589	21.8897	0	0	68.6833	0	0	0	0	0	6689.4	0.0631745	0.409932	0.279027	0	0	0.513015	0	0	0	0	0	0.194826	0	34
		C44H77O13P	24.9796	4.39196	0	310.076	4.81708	0	4.40725	3.74052	0	0	780.693	0	0.0894032	0.0224045	0	1.54494	0.0255745	0	0.0290944	0.0306443	0	0	6.35733	0	4	35
		C44H79O13P	0	0	0	0	0	0	0	0	0	0	0	246.501	0	0	0	0	0	0	0	0	0	0	0	0.00717923	3	35
		C44H83O13P	0	0	0	9.06076	10.0021	0	0	0	0	0	0	0	0	0	0	0.0451447	0.0531022	0	0	0	0	0	0	0	1	35
		C44H85O13P	0	0	2.15859	0	3.24025	0	0	0	0.910366	0	0	179355	0	0	0.0275155	0	0.0172029	0	0	0	0.00729261	0	0	5.22362	0	35
		C45H83O13P	0	0	0	0	0	0	0	0	0	0	0	11325.7	0	0	0	0	0	0	0	0	0	0	0	0.329857	2	36
		C45H87O13P	22.3976	48.2717	0	0	0	0	0	0	0	0	0	0	0.080162	0.246247	0	0	0	0	0	0	0	0	0	0	0	36
		C46H83O13P	0	0	0	0	0	0	18.4586	15.8062	0	0	0	1443.76	0	0	0	0	0	0	0.121854	0.129493	0	0	0	0.0420488	3	37
		C46H89O13P	20.5023	34.1052	0	73.802	82.0956	0	0	0	0	0	2.10243	0	0.0733788	0.173979	0	0.367714	0.435856	0	0	0	0	0	0.0171205	0	0	37
		C48H91O13P	0	0	0	0	65.9878	0	0	0	0	0	0	0	0	0	0	0	0.350337	0	0	0	0	0	0	0	1	39
		C48H93O13P	0	2.11635	0	7.6106	6.52035	6.22356	0	149.34	0	0	0	0	0	0.010796	0	0.0379194	0.0346174	0.0464855	0	1.22347	0	0	0	0	0	39
		C49H95O13P	0	152.987	0	0	1.80278	0	0	0	0	0	7.35284	0	0	0.780428	0	0	0.00957119	0	0	0	0	0	0.0598756	0	0	40
		C50H93O13P	0	9.11991	40.9286	0	0	0	0	0	7.91709	0	0	4243.42	0	0.0465231	0.521715	0	0	0	0	0	0.0634209	0	0	0.123588	2	41
		C53H99O13P	0	0	0	0	0	0	0	12.0121	0	0	0	0	0	0	0	0	0	0	0	0.0984093	0	0	0	0	2	44
		C53H103O13P	0	0	0.226759	0	0	0	0	0	0	0	0	0	0	0	0.00289048	0	0	0	0	0	0	0	0	0	0	44
		C54H101O13P	0	0	0	0	3.74932	19.9945	0	7.00506	323.604	0	0	26829.6	0	0	0	0	0.0199056	0.149344	0	0.057389	2.59227	0	0	0.781399	2	45
		C55H105O13P	0.857717	0	0	0	1.65244	0	0	0	0	0	0	0	0.00306981	0	0	0	0.00877299	0	0	0	0	0	0	0	1	46
		C55H107O13P	78.2221	0	0	36.6122	3.45733	0	149.468	3.73836	0	93.6112	0	0	0.27996	0	0	0.182418	0.0183554	0	0.986711	0.0306265	0	0.734514	0	0	0	46
		C56H107O13P	9.22717	0	0	0	0	0	0	0	0	0	0	0	0.0330245	0	0	0	0	0	0	0	0	0	0	0	1	47
		C57H107O13P	0	3.04432	0	0	0	0	0.280462	5.18374	0	2.17131	1.33587	0	0	0.0155299	0	0	0	0	0.00185147	0.0424679	0	0.017037	0.0108782	0	2	48
		C57H109O13P	0	0	0	2.62145	1.75206	0	7.49622	29.209	0	0	0	1358.81	0	0	0	0.0130612	0.00930192	0	0.0494862	0.239295	0	0	0	0.0395747	1	48
		C59H111O13P	0	0	0	3.59447	0	0	0	0	0	0	0.559082	0	0	0	0	0.0179092	0	0	0	0	0	0	0.00455271	0	2	50
		C59H113O13P	0	0	0	0	0	0	0	0	0	0	0	248.176	0	0	0	0	0	0	0	0	0	0	0	0.00722801	1	50
		C59H115O13P	0	0	0	0	0	498.975	0	0	0	0	0	50816.2	0	0	0	0	0	3.72699	0	0	0	0	0	1.48	0	50
		C60H115O13P	0	0	0	0	0	0	0	0	0	0	0	474.131	0	0	0	0	0	0	0	0	0	0	0	0.0138088	1	51
		C61H119O13P	0	0	0	4.92138	17.9109	0	0	0	0	0	0	0	0	0	0	0.0245205	0.0950913	0	0	0	0	0	0	0	0	52
		C62H121O13P	0	0	0	0	0	0	14.8495	16.6933	0	0	0	0	0	0	0	0	0	0	0.098029	0.13676	0	0	0	0	0	53
		C64H125O13P	0	0	0	0	1.61094	0	0	0	0	0	0	0	0	0	0	0	0.00855268	0	0	0	0	0	0	0	0	55
		C65H123O13P	0	0	0	0	0	0	3.42717	0	0	0	0	0	0	0	0	0	0	0	0.0226244	0	0	0	0	0	2	56
		C65H127O13P	0	0	0	0	0	0	0	0	0	0	2.49608	0	0	0	0	0	0	0	0	0	0	0	0.020326	0	0	56
		C67H131O13P	0	0	0	1.53419	0	0	0	0	0	0	0	0	0	0	0	0.00764401	0	0	0	0	0	0	0	0	0	58
		C69H135O13P	0	1.73072	0	0	0.586549	0	1.97536	0	0	10.6215	0	0	0	0.00882884	0	0	0.00311406	0	0.0130403	0	0	0.0833411	0	0	0	60
		C70H137O13P	0	0	0.0669546	0	0	0	0	0	0	0	0	0	0	0	0.000853465	0	0	0	0	0	0	0	0	0	0	61
		C73H143O13P	0	0	0	0	0	0	0	56.9841	0	0	0	0	0	0	0	0	0	0	0	0.466843	0	0	0	0	0	64
	CL	C57H104O17P2	433.065	1.00558	0	0.760245	0.762257	0	445.14	425.063	0	0	151.412	0	1.54996	0.00512975	0	0.00378787	0.00404692	0	2.93858	3.48234	0	0	1.23297	0	3	48
		C57H110O17P2	0	0	0	0	0.663895	0	0	0	0	0	0	0	0	0	0	0	0.0035247	0	0	0	0	0	0	0	0	48
		C58H106O17P2	0	0	0	0	0	0	0	60.6418	0	0	0	0	0	0	0	0	0	0	0	0.496809	0	0	0	0	3	49
		C59H110O17P2	0	0	0	0	0	8.65238	0	0	0	0	0	1050.07	0	0	0	0	0	0.0646271	0	0	0	0	0	0.0305827	2	50
		C61H112O17P2	0	0	0	0	0	0	0	2.13231	0	152.399	0	0	0	0	0	0	0	0	0	0.017469	0	1.19579	0	0	3	52
		C61H118O17P2	0	0	0	0	0	0	0	0	0	0	0	200.549	0	0	0	0	0	0	0	0	0	0	0	0.0058409	0	52
		C62H116O17P2	43.8362	595.571	41.7388	0	0	0	52.7039	6.34763	70.7497	0.781559	13.9493	0	0.156892	3.03816	0.532042	0	0	0	0.347924	0.052003	0.566751	0.00613244	0.113592	0	2	53
		C63H118O17P2	0	0	0	0	0	0	6.22969	0	0	0	0	0	0	0	0	0	0	0	0.0411252	0	0	0	0	0	2	54
		C63H122O17P2	43.4393	0	0	0	0	0	0	0	0	0	0	0	0.155471	0	0	0	0	0	0	0	0	0	0	0	0	54
		C64H120O17P2	0	0	0	0	0	0	0	0	0	4.02026	0	0	0	0	0	0	0	0	0	0	0	0.0315447	0	0	2	55
		C65H122O17P2	0	0	0	0	0	0	23.805	0	0	0	0	0	0	0	0	0	0	0	0.157148	0	0	0	0	0	2	56
		C65H124O17P2	0	0	0	0	0	0	0	0	16.9839	0	0	0	0	0	0	0	0	0	0	0	0.136052	0	0	0	1	56
		C66H124O17P2	0	0	0	0	0	0	1.26254	0	0	0	0	1891.4	0	0	0	0	0	0	0.00833466	0	0	0	0	0.276663	2	57
		C66H126O17P2	0	0	0	0	1.47164	3.75028	0	0	23.8568	0	0	9499.3	0	0	0	0	0.00781311	0.0280119	0	0	0.191108	0	0	0.0550862	1	57
		C66H128O17P2	0	0	0.512381	0	0	0	0	0	0	0	0	0	0	0	0.00653129	0	0	0	0	0	0	0	0	0	0	57
		C67H124O17P2	0	59.5808	4.80751	0	0	0	3.04526	0	20.8314	0	0	0	0	0.303937	0.061281	0	0	0	0.0201033	0	0.166873	0	0	0	3	58
		C67H126O17P2	0	0	3.7057	0	2.04585	13.4274	0	0	0	0	0	0	0	0	0.0472364	0	0.0108617	0.100293	0	0	0	0	0	0	2	58
		C67H128O17P2	0	0	0.631692	0	0	0	0	0	0	0	0	1440.14	0	0	0.00805214	0	0	0	0	0	0	0	0	0.0419433	1	58
		C67H130O17P2	0	0	0	0	0	0	0	0	0.510557	0	0	0	0	0	0	0	0	0	0	0	0.00408989	0	0	0	0	58
		C68H126O17P2	0	0	0	10.1601	25.5937	15.2154	0	0	0	0	0	0	0	0	0	0.0506221	0.13588	0.113648	0	0	0	0	0	0	3	59
		C68H128O17P2	286.847	282.678	915.989	56.354	9.90105	35.8216	247.279	230.974	808.411	90.4515	88.3058	266963	1.02664	1.44201	11.676	0.28078	0.0525659	0.267561	1.63241	1.89225	6.47589	0.709721	0.719091	7.77518	2	59
		C69H126O17P2	0	0	0	0.758799	0	0	0	0	0	0	3.17122	0	0	0	0	0.00378067	0	0	0	0	0	0	0.0258239	0	4	60
		C69H128O17P2	0	0	0	0	0	0	0	0	0	7.94825	8.39341	0	0	0	0	0	0	0	0	0	0	0.0623653	0.0683492	0	3	60
		C69H130O17P2	0	0	0	4.8598	9.60132	0	3.41892	0	5.9281	0	0	0	0	0	0	0.0242136	0.0509746	0	0.0225699	0	0.0474879	0	0	0	2	60
		C69H132O17P2	0	0	0	0	0	0	0	0	0	0	0	1610.77	0	0	0	0	0	0	0	0	0	0	0	0.0469129	1	60
		C70H128O17P2	0	0	0	6.81093	0	0	0	0	0	0	0	0	0	0	0	0.0339351	0	0	0	0	0	0	0	0	4	61
		C70H130O17P2	0	0	0	0	0	3.64479	0	0	0	0	0	0	0	0	0	0	0	0.027224	0	0	0	0	0	0	3	61
		C70H132O17P2	0	0	0	0	0	0	22.2319	22.7147	0	2.53543	0	1153.2	0	0	0	0	0	0	0.146763	0.186091	0	0.019894	0	0.0335863	2	61
		C71H132O17P2	0	0	0	0	0	0	0	0	0	0	0	461.042	0	0	0	0	0	0	0	0	0	0	0	0.0134276	3	62
		C71H134O17P2	0	0	0	0	0	0	17.8363	16.3623	0	0	0	0	0	0	0	0	0	0	0.117746	0.134049	0	0	0	0	2	62
		C72H132O17P2	0	0	0	0	0	0	2.08452	3.19682	0	0	7.05851	0	0	0	0	0	0	0	0.013761	0.02619	0	0	0.0574789	0	4	63
		C72H136O17P2	11.1968	11.9032	13.1104	0	0	0	4.40841	3.63785	0	0	4.10444	0	0.0400738	0.0607211	0.167117	0	0	0	0.029102	0.0298031	0	0	0.0334232	0	2	63
		C73H136O17P2	0	0	0	0	0	0	0	0	0	2.50937	3.08221	0	0	0	0	0	0	0	0	0	0	0.0196896	0.025099	0	3	64
		C73H140O17P2	0	0	0	0	0	0	22.0233	0	5.31432	8.67865	0	0	0	0	0	0	0	0	0.145386	0	0.0425711	0.0680964	0	0	1	64
		C73H142O17P2	0	0	0	0	0	0	0	0	4.12077	0	0	0	0	0	0	0	0	0	0	0	0.03301	0	0	0	0	64
		C74H138O17P2	0	0	0	0	12.9917	0	0	0	0	0	0	0	0	0	0	0	0.0689747	0	0	0	0	0	0	0	3	65
		C74H140O17P2	0	0	0	0	0	0	0	5.60447	0	0	0	0	0	0	0	0	0	0	0	0.0459147	0	0	0	0	2	65
		C75H140O17P2	0	0	0	0	0	1.07428	0	0	0	0	0	0	0	0	0	0	0	0.00802411	0	0	0	0	0	0	3	66
		C76H140O17P2	0	0	0	1.45182	0	0	0	0	0	0	0	0	0	0	0	0.00723362	0	0	0	0	0	0	0	0	4	67
		C77H148O17P2	0	0	0	0	0	0	0	0	0	0	0	87.0489	0	0	0	0	0	0	0	0	0	0	0	0.00253526	1	68
		C78H148O17P2	0	0	0	0	0	0.915342	0	0	0	0	0	153.039	0	0	0	0	0	0.00683695	0	0	0	0	0	0.00445718	2	69
		C78H152O17P2	0	0	0	0	0	0	0	0	1.67856	0	0	267.222	0	0	0	0	0	0	0	0	0.0134463	0	0	0.00778272	0	69
		C79H152O17P2	0	0	0	0	0	0	0	0	0	0	0	202.757	0	0	0	0	0	0	0	0	0	0	0	0.00590519	1	70
		C80H152O17P2	0	0	0	0	0	0	0.522525	0.469586	0	0	0	0	0	0	0	0	0	0	0.00344945	0.00384709	0	0	0	0	1	71
		C80H154O17P2	0	0	0	0	0	0	1.11054	1.16789	0	0	0	727.445	0	0	0	0	0	0	0.00733121	0.00956792	0	0	0	0.0211865	2	71
		C81H156O17P2	0	0	0	0	0	0	0	0	0	0	0	360.776	0	0	0	0	0	0	0	0	0	0	0	0.0105074	1	72
		C82H158O17P2	0	0	0	0	0	0	26.101	13.7913	0	11.1996	3.97487	1143.73	0	0	0	0	0	0	0.172306	0.112986	0	0.0878772	0.0323682	0.0333105	1	73
		C84H156O17P2	0	0	0	0	0	0.183429	0	0	0	0	0	0	0	0	0	0	0	0.00137009	0	0	0	0	0	0	4	74
		C84H160O17P2	0	0	0	0	0	0	14.7987	12.8001	0	6.26328	5.68467	0	0	0	0	0	0	0	0.0976936	0.104865	0	0.0491444	0.0462913	0	2	75
		C85H162O17P2	0	0	0	0	0	0	1.7271	0	0	3.98455	3.79751	0	0	0	0	0	0	0	0.0114014	0	0	0.0312645	0.0309239	0	2	76
		C85H164O17P2	0	0	0	0	0	0.735516	0	0	0	112.127	137.731	0	0	0	0	0	0	0.00549378	0	0	0	0.879794	1.12157	0	1	76
		C85H166O17P2	0	0	0	0	0	3.03659	0	0	0	0	0	0	0	0	0	0	0	0.0226811	0	0	0	0	0	0	0	76
		C86H164O17P2	0	0	0	0	0	0	0	0	0	4.28322	3.98758	0	0	0	0	0	0	0	0	0	0	0.0336079	0.0324717	0	2	77
		C86H166O17P2	0	0	0	0	0	0	0	0	0.16577	0	0	0	0	0	0	0	0	0	0	0	0.00132792	0	0	0	1	77
		C86H168O17P2	0	0	0	0	0	0	0	0	2.32791	0	0	0	0	0	0	0	0	0	0	0	0.0186481	0	0	0	0	77
		C87H166O17P2	0	0	0	0	0	0	0	0	0	17.5983	19.2423	0	0	0	0	0	0	0	0	0	0	0.138084	0.156694	0	2	78
		C88H170O17P2	0	0	0	0	0	0	0	0	0	0	0	342.762	0	0	0	0	0	0	0	0	0	0	0	0.00998277	1	79
		C90H170O17P2	0	0	0	0	0	0	0	0	3.13669	0	0	0	0	0	0	0	0	0	0	0	0.0251269	0	0	0	3	81
		C107H204O17P2	0	0	0	0	0	0	0	0	0.199683	0	0	0	0	0	0	0	0	0	0	0	0.00159959	0	0	0	3	98
		C122H238O17P2	0	0	0	0	0	0	0	0	0	0	0	384.906	0	0	0	0	0	0	0	0	0	0	0	0.0112102	1	113
		C127H250O17P2	0	0	0	0	0	0	0	0	0.0276612	0	0	0	0	0	0	0	0	0	0	0	0.000221584	0	0	0	0	118
	LPIM1	C31H59O17P	0	0	0	0	0	0	0	0	0	1.31571	1.25309	2133.22	0	0	0	0	0	0	0	0	0	0.0103236	0.0102041	0.062129	0	16
		C32H61O17P	0	10.5383	0	0	0	1.1132	0	0	0	1.22877	2.77049	0	0	0.0537584	0	0	0	0.00831479	0	0	0	0.00964143	0.0225606	0	0	17
		C33H61O17P	0	0	0	0	0	0	0	0	0	0	0	1070.73	0	0	0	0	0	0	0	0	0	0	0	0.0311846	1	18
		C33H63O17P	0	0	0	0	0	0	0	0	0	0	0	386.493	0	0	0	0	0	0	0	0	0	0	0	0.0112564	0	18
		C34H65O17P	0	0	0	0	0	0	0	0	0	0	0	795.769	0	0	0	0	0	0	0	0	0	0	0	0.0231764	0	19
		C34H61O17P	0	0	0	0	0	0	8.43502	8.32378	0	0	0	0	0	0	0	0	0	0	0.0556837	0.0681927	0	0	0	0	2	19
	LPIM2	C37H69O22P	0	0	0	0	0	0	0	0	0.802466	0	0	5598.78	0	0	0	0	0	0	0	0	0.00642826	0	0	0.163062	0	16
		C38H71O22P	7.64707	8.13524	0	0	10.0951	0	12.3739	13.2408	0	0	0	0	0.0273692	0.0415	0	0	0.0535963	0	0.0816863	0.108475	0	0	0	0	0	17
		C39H69O22P	0	0	0	0	0	0	0	0	0.0631637	0	0	0	0	0	0	0	0	0	0	0	0.000505982	0	0	0	2	18
		C39H71O22P	0	0	0	0	0	0	0	0	0	0	0	593.067	0	0	0	0	0	0	0	0	0	0	0	0.0172728	1	18
		C40H75O22P	0	0	0	0	0	0	0	0	0	0	0	153.03	0	0	0	0	0	0	0	0	0	0	0	0.00445693	0	19
	LPIM3	C43H79O27P	0	0	0.0863959	0	0	0	0	0	0	0	0	1502.22	0	0	0.00110128	0	0	0	0	0	0	0	0	0.0437514	0	16
		C46H83O27P	0	0	0	0	0	0	2.30346	2.24403	0	1.35659	1.92825	0	0	0	0	0	0	0	0.0152062	0.0183843	0	0.0106444	0.0157021	0	1	19
	LPIM4	C49H89O32P	0	0	0	0	0	0	0	0	0	0	0	102.399	0	0	0	0	0	0	0	0	0	0	0	0.00298232	0	16
		C51H89O32P	0.22123	0	0	0	0	0	0	0	0	0	0.279938	0	0.000791792	0	0	0	0	0	0	0	0	0	0.00227959	0	2	18
	LPIM5	C55H99O37P	0	0	0	0	0	0	0	0	0	0	0	190.57	0	0	0	0	0	0	0	0	0	0	0	0.00555026	0	16
		C57H103O37P	0	0	0	0	0	0	0	0	0	0	0	909.85	0	0	0	0	0	0	0	0	0	0	0	0.0264989	0	18
	LPIM6	C61H109O42P	0	0	0	0	0	0	0	0	0.0304832	0	0	280.346	0	0	0	0	0	0	0	0	0.00024419	0	0	0.00816494	0	16
		C64H115O42P	0	0	0.0666009	0	0	0	0	0	0	0	0	0	0	0	0.000848958	0	0	0	0	0	0	0	0	0	0	19
	PIM1	C45H85O18P	0	0	0	0	0	0	0	0	1.41159	0	0	3357.85	0	0	0	0	0	0	0	0	0.0113077	0	0	0.0977957	0	30
		C47H87O18P	0	0	0	0	0	0	0	0	1.51092	0	0	4267.64	0	0	0	0	0	0	0	0	0.0121035	0	0	0.124293	1	32
		C47H89O18P	0	0	2.04194	0	0	0	4.44493	4.92029	19.448	11.5223	10.795	4972.92	0	0	0.0260285	0	0	0	0.0293431	0.0403096	0.155791	0.0904093	0.0879062	0.144834	0	32
		C48H91O18P	56.4463	1.39642	123.565	12.6305	14.4513	46.4372	7.02203	3.55584	0	0	0	1553.63	0.202024	0.00712352	1.57508	0.0629306	0.0767237	0.346853	0.0463558	0.0291313	0	0	0	0.0452486	0	33
		C49H93O18P	22.2237	19.1011	0	0	0	0	0	0	0.742454	0	0	0	0.0795395	0.0974394	0	0	0	0	0	0	0.00594753	0	0	0	0	34
		C50H89O18P	0	0	0	0	0	0	0	0	0.362179	0	0	0	0	0	0	0	0	0	0	0	0.00290128	0	0	0	3	35
		C50H95O18P	0	0	0.434109	0	0	0	0	0	0	0	0	0	0	0	0.00553356	0	0	0	0	0	0	0	0	0	0	35
		C51H91O18P	0.517385	2.31431	0	0	0	0	0	0	0	0	0	0	0.00185175	0.0118059	0	0	0	0	0	0	0	0	0	0	3	36
		C51H93O18P	0	0	0	0	0	0	0	0	2.19832	2.32085	2.43326	0	0	0	0	0	0	0	0	0	0.01761	0.0182104	0.0198145	0	2	36
		C51H95O18P	118.404	0	14.135	0	0	2.71223	4.20595	4.03787	0	0	0	1147.17	0.423774	0	0.180178	0	0	0.0202584	0.0277655	0.0330803	0	0	0	0.0334107	1	36
		C51H97O18P	0	0	0	3.50755	0	13.3443	0	0	0	0	0	0	0	0	0	0.0174761	0	0.0996726	0	0	0	0	0	0	0	36
		C52H93O18P	0	0	0	0	0	0	0	0	0	0	1.19341	221.916	0	0	0	0	0	0	0	0	0	0	0.00971819	0.00646321	3	37
		C52H95O18P	0	0	0	1.51487	0.925433	0	0	0	0	3.31947	3.78709	281.204	0	0	0	0.00754774	0.00491324	0	0	0	0	0.0260459	0.030839	0.00818994	2	37
		C52H99O18P	6.04153	0	0	0	0	0	0	0	0	0	0.429514	0	0.0216229	0	0	0	0	0	0	0	0	0	0.00349762	0	0	37
	PIM2	C51H95O23P	0	0	0	0	0	0	0	0	0	0	0	2132.29	0	0	0	0	0	0	0	0	0	0	0	0.0621019	0	30
		C52H97O23P	0	0	0	0	0	0	0	0	0	0	0	209.144	0	0	0	0	0	0	0	0	0	0	0	0.00609121	0	31
		C53H97O23P	0	0	0	0	0	0	0	0	0	0	0	5741.04	0	0	0	0	0	0	0	0	0	0	0	0.167205	1	32
		C53H99O23P	0	0	0	0	0	0	0	0	4.54216	0	0	3951.43	0	0	0	0	0	0	0	0	0.0363856	0	0	0.115083	0	32
		C54H101O23P	0	0	0	0	0	0	0	0	0	0	0	660.353	0	0	0	0	0	0	0	0	0	0	0	0.0192325	0	84
		C55H97O23P	0	0	0.547473	0	0	0	0	0	0	0	0	0	0	0	0.0069786	0	0	0	0	0	0	0	0	0	3	34
		C55H99O23P	0.619585	0.342767	0	0	0	0	0	0	0	0	0	0	0.00221752	0.00174855	0	0	0	0	0	0	0	0	0	0	2	34
		C55H103O23P	0	0	0	0	0	0	0	0	0	0	0	613.014	0	0	0	0	0	0	0	0	0	0	0	0.0178537	0	34
		C56H97O23P	0	0	0	0	0	0	1.05188	1.06215	0	0	0	0	0	0	0	0	0	0	0.00694395	0.0087017	0	0	0	0	4	35
		C56H99O23P	0	0	0	0	0	0	0	0	0.456063	0	0	0	0	0	0	0	0	0	0	0	0.00365336	0	0	0	3	35
		C56H105O23P	0	0	0	0	0	0.830283	0	0	0	0	0	138.223	0	0	0	0	0	0.00620162	0	0	0	0	0	0.00402568	0	35
		C57H101O23P	0	0	0	0	0	1.40336	0	0	0	0	0	0	0	0	0	0	0	0.0104821	0	0	0	0	0	0	3	36
		C58H103O23P	0	0	0	0	0	0.274646	0	0	0.270355	0	0	57.695	0	0	0	0	0	0.00205141	0	0	0.00216572	0	0	0.00168034	3	37
		C58H105O23P	0	0	0	0	0	0	0	0.135121	0	1.79417	1.76995	0	0	0	0	0	0	0	0	0.00110698	0	0.0140778	0.0144131	0	2	37
		C58H107O23P	0	0	0	0	0	0	0	0	0.134827	0	0	0	0	0	0	0	0	0	0	0	0.00108005	0	0	0	1	37
		C58H109O23P	0.335143	0	0.346921	0	0	0	1.76666	1.65686	0	0.535303	0.315681	0	0.00119949	0	0.00442218	0	0	0	0.0116626	0.0135739	0	0.00420022	0.00257065	0	0	37
	PIM3	C59H109O28P	0	0	0.504797	0	0	0	0	0	0.519403	0	0	774.848	0	0	0.00643461	0	0	0	0	0.00416075	0	0	0	0.0225671	0	32
		C60H107O28P	0	0	2.26403	0	0	2.29186	0	0	6.18309	0	0	0	0	0	0.0288595	0	0	0.0171186	0	0.0495305	0	0	0	0	2	33
		C60H111O28P	0	0	0.246914	0	0	0	0	0	0	0	0	0	0	0	0.00314739	0	0	0	0	0	0	0	0	0	0	33
		C61H105O28P	0	0	0	0	0	0	0	0	0.0679619	0	0	0	0	0	0	0	0	0	0	0.000544419	0	0	0	0	4	34
		C61H111O28P	0	0	0	0	0	0.281331	0	0	0	0	0	0	0	0	0	0	0	0.00210134	0	0	0	0	0	0	1	34
		C62H115O28P	0	0	1.82993	0	0	0.855746	0	0	0	0	0	0	0	0	0.0233259	0	0	0.00639181	0	0	0	0	0	0	0	35
		C64H115O28P	0	0	0.0320781	0	0	0	0	0	0	0	0	0	0	0	0.000408897	0	0	0	0	0	0	0	0	0	2	35
	PIM4	C63H115O33P	0	0	0	0	0	0	0	0	0	0	0	60.5475	0	0	0	0	0	0	0	0	0	0	0	0.00176342	0	30
		C65H119O33P	0	0	0.467018	0	0	0	0	0	0	0	0	466.172	0	0	0.00595305	0	0	0	0	0	0	0	0	0.013577	0	32
		C68H125O33P	0	0	0.254572	0	0	0	0	0	0	0	0	0	0	0	0.00324501	0	0	0	0	0	0	0	0	0	0	35
		C87H151O33P	0	0	0	0	0	0	0	0	0	0	0	308.94	0	0	0	0	0	0	0	0	0	0	0	0.00899772	0	54
	PIM5	C71H129O38P	0	0	0.109346	0	0	0	0	0	0	0	0	142.856	0	0	0.00139382	0	0	0	0	0	0	0	0	0.00416062	0	32
		C74H127O38P	0	0	0	0	0	0	1.42038	2.09378	0	0	0	0	0	0	0	0	0	0	0.00937659	0.0171534	0	0	0	0	4	35
		C74H135O38P	0	0	0.0201359	0	0	0	0	0	0	0	0	100.173	0	0	0.000256671	0	0	0	0	0	0	0	0	0.00291748	0	35
	PIM6	C75H135O43P	0	0	0	0	0	0	0	0	0	0	0	253.544	0	0	0	0	0	0	0	0	0	0	0	0.00738434	0	30
		C77H135O43P	0	0	0	0	0	0	0	0	0.157714	0	0	0	0	0	0	0	0	0	0	0.00126339	0	0	0	0	2	32
		C77H139O43P	0	0	0.57014	0	0	0.60159	0	0	0.34916	0	0	134.204	0	0	0.00726754	0	0	0.00449345	0	0.002797	0	0	0	0.00390863	0	32
		C79H143O43P	0	0	0	0	0	0	0	0	0	0	3.49818	0	0	0	0	0	0	0	0	0	0	0	0.0284864	0	0	34
		C80H145O43P	0	0	3.17893	0	0	3.90584	0	0	2.13918	0	0	125.635	0	0	0.0405217	0	0	0.0291738	0	0.0171362	0	0	0	0.00365907	0	35
	AC1PIM1	C59H111O19P	3.58197	0	3.8205	0	0	0	3.85898	4.10799	0	0	0	0	0.01282	0	0.0486996	0	0	0	0.025475	0.0336548	0	0	0	0	0	44
		C61H111O19P	0	0	0	0	0	0	0	0	0	10.6509	9.81961	0	0	0	0	0	0	0	0	0	0	0.0835711	0.079963	0	2	46
		C62H115O19P	0	0	0	2.65731	0	0	0	0	0	0	0	0	0	0	0	0.0132399	0	0	0	0	0	0	0	0	1	47
		C62H117O19P	0	0	19.5135	0	0	0	0	0	33.301	0	0	6942.29	0	0	0.248737	0	0	0	0	0	0.266763	0	0	0.202191	0	47
		C63H113O19P	0	0	0	5.21167	0	0	0	0	0	0	0	0	0	0	0	0.0259668	0	0	0	0	0	0	0	0	3	48
		C63H115O19P	0	0	0	10.704	0	0	0	0	0	41.3693	21.0543	0	0	0	0	0.0533322	0	0	0	0	0	0.324601	0.171449	0	2	48
		C63H117O19P	0	0	0	0	53.6585	0	52.0871	38.3311	0	0	0	0	0	0	0	0	0.284879	0	0.343852	0.314028	0	0	0	0	1	48
		C63H119O19P	0	0	23.7291	0	0	0	0	0	1.02074	0	0	1301.64	0	0	0.302474	0	0	0	0	0	0.00817678	0	0	0.0379097	0	48
		C64H117O19P	0	0	0	43.4139	39.9825	0	23.8645	23.1212	0	0	0	0	0	0	0	0.216307	0.212272	0	0.157541	0.18942	0	0	0	0	2	49
		C64H119O19P	0	0	0	0	81.2032	0	57.9311	55.6968	0	0	0	0	0	0	0	0	0.431118	0	0.382432	0.456297	0	0	0	0	1	49
		C65H113O19P	0	0	0	233.104	1.70514	0	1.35813	63.6634	0	50.1693	60.9714	0	0	0	0	1.16143	0.00905281	0	0.00896571	0.521563	0	0.393649	0.496502	0	5	50
		C65H117O19P	0	0	0	27.7668	0	0	0	0	0	0	0	0	0	0	0	0.138346	0	0	0	0	0	0	0	0	3	50
		C65H119O19P	0	1.33778	0	0	6.8125	0	26.8708	35.8765	0	57.1445	26.369	0	0	0.00682434	0	0	0.0361684	0	0.177388	0.293919	0	0.44838	0.214728	0	2	50
		C65H121O19P	0	0	0	0	0	0	23.805	7.04853	0	5.15656	0	0	0	0	0	0	0	0	0.157148	0.0577452	0	0.0404606	0	0	1	50
		C65H123O19P	0	0	5.20247	0	0	4.89388	0	0	0	0	0	0	0	0	0.0663155	0	0	0.0365538	0	0	0	0	0	0	0	50
		C66H115O19P	0	3.48168	0	7.68582	8.26935	0	141.177	135.592	0	8.67578	6.58813	0	0	0.017761	0	0.0382941	0.043903	0	0.93198	1.11084	0	0.0680739	0.0536484	0	5	51
		C66H117O19P	0	0	0	1.10475	0.669552	0	0	0.480285	0	0	0	0	0	0	0	0.00550433	0.00355474	0	0	0.00393474	0	0	0	0	4	51
		C66H119O19P	0	0	0	34.0087	36.9696	0	0	0	0	0	0	0	0	0	0	0.169447	0.196276	0	0	0	0	0	0	0	3	51
		C66H121O19P	5.86696	8.78754	0	0	25.0686	0	22.641	13.7571	0	91.1012	55.297	0	0.0209981	0.0448275	0	0	0.133093	0	0.149464	0.112705	0	0.714819	0.450294	0	2	51
		C66H123O19P	0	0	0	0	0	0	0	0	0	54.9489	0	638.992	0	0	0	0	0	0	0	0	0	0.431152	0	0.170327	1	51
		C66H125O19P	0	0	5.88596	0	0	26.586	0	0	2.97032	0	0	5848.22	0	0	0.075028	0	0	0.198578	0	0	0.0237941	0	0	0.0186103	0	51
		C67H117O19P	0	2.6134	0	0	0	0	83.1599	69.6377	0	22.0521	21.398	0	0	0.0133316	0	0	0	0	0.548979	0.570508	0	0.17303	0.174248	0	5	52
		C67H121O19P	0	0	0	15.0277	0	0	12.6556	28.1823	0	0	0	0	0	0	0	0.0748744	0	0	0.0835458	0.230884	0	0	0	0	3	52
		C67H123O19P	4.24173	5.84912	0	0	3.7738	0	4.91694	1.01395	20.8342	0	0	0	0.0151813	0.0298379	0	0	0.0200356	0	0.0324591	0.00830678	0.166895	0	0	0	2	52
		C67H125O19P	0	0	0	0	0	0	0	0	15.0272	0	0	0	0	0	0	0	0	0	0	0	0.120377	0	0	0	1	52
		C67H127O19P	0	0	0.631692	0	0	0	0	0	0	0	0	4277.01	0	0	0.00805214	0	0	0	0	0	0	0	0	0.124566	0	52
		C68H119O19P	89.7263	2.6386	0	0	79.2361	0	10.6162	2.38182	0	85.7238	81.3167	0	0.321134	0.0134602	0	0	0.420674	0	0.0700829	0.0195131	0	0.672625	0.662178	0	5	53
		C68H121O19P	6.73886	54.9281	0	48.6978	47.6018	0.416119	0	0	0	13.2807	15.3698	0	0.0241187	0.280202	0	0.242634	0.252724	0.00310811	0	0	0	0.104206	0.125159	0	4	53
		C68H123O19P	16.8352	0	0	0	0	0	0	0	0	5.18712	7.98147	0	0.0602539	0	0	0	0	0	0	0	0	0.0407004	0.0649946	0	3	53
		C68H125O19P	0	1.41392	0	0	0	15.3627	0	1.77803	0	2.38386	3.36808	0	0	0.00721276	0	0	0	0.114748	0	0.0145665	0	0.0187047	0.027427	0	2	53
		C68H127O19P	0	0	0	0	0	0	0	0	0	0	0	3733.94	0	0	0	0	0	0	0	0	0	0	0	0.108749	1	53
		C69H121O19P	70.0744	1.19129	7.94901	0	0	0	65.738	62.9325	5.13132	79.2627	70.1201	0	0.250799	0.00607708	0.101325	0	0	0	0.433969	0.515575	0.0411052	0.621929	0.571002	0	5	54
		C69H123O19P	0	0	0.709718	0	0	0	0	0	0	0	0	0	0	0	0.00904672	0	0	0	0	0	0	0	0	0	4	54
		C69H125O19P	20.0573	0	0	0	0	0	0	0	0	1.60273	31.6605	0	0.071786	0	0	0	0	0	0	0	0	0.0125757	0.257818	0	3	54
		C69H127O19P	0	0	0	0	0.472706	0	0	0	0	7.74067	0	0	0	0	0	0	0.00250966	0	0	0	0	0.0607366	0	0	2	54
		C70H123O19P	11.229	2.46049	0	5.34208	6.48253	0	0	0	0	8.47017	11.7044	0	0.0401891	0.0125516	0	0.0266166	0.0344166	0	0	0	0	0.0664606	0.0953111	0	5	55
		C70H127O19P	1.12746	0	0	2.28255	2.48937	0	0	0	0	0	0	0	0.00403524	0	0	0.0113727	0.0132164	0	0	0	0	0	0	0	3	55
		C70H129O19P	0	0	0	0	0	3.79842	0	0	0	0	0	0	0	0	0	0	0	0.0283715	0	0	0	0	0	0	2	55
		C71H131O19P	0	2.48039	0	0	2.81502	0	0	0	0	0	0	0	0	0.0126531	0	0	0.0149453	0	0	0	0	0	0	0	2	56
		C72H129O19P	0	0	0	0	0	0	7.37725	0	0	0	0	0	0	0	0	0	0	0	0.0487008	0	0	0	0	0	4	57
		C72H135O19P	0	0	0	0	0	0	0	0	0	4.70793	4.10444	0	0	0	0	0	0	0	0	0	0	0.0369405	0.0334232	0	1	57
	AC1PIM2	C67H123O24P	35.2081	40.5046	2.80281	0	0	0	34.7564	38.6261	4.36936	11.789	13.6756	638.675	0.126011	0.206625	0.0357272	0	0	0	0.229444	0.316445	0.0350014	0.0925015	0.111363	0.0186011	1	46
		C68H125O24P	0	0	0	0	0	0	0	0	0.32315	0	0	0	0	0	0	0	0	0	0	0	0.00258864	0	0	0	1	47
		C70H131O24P	0	0	0	0	0	0	0	0	0.587931	0	0	0	0	0	0	0	0	0	0	0	0.0047097	0	0	0	0	49
		C71H131O24P	4.38266	3.40647	0	0	0	0	0	0	0	2.82918	4.14266	0	0.0156857	0.0173773	0	0	0	0	0	0	0	0.022199	0.0337345	0	1	50
		C71H133O24P	0	3.79934	0	0	0	0	0	0	0	0	0	0	0	0.0193814	0	0	0	0	0	0	0	0	0	0	0	50
		C72H135O24P	10.9423	0	2.58494	0	0	0	0	0	0.798207	0	0	0	0.039163	0	0.03295	0	0	0	0	0	0.00639415	0	0	0	0	51
		C73H131O24P	0	0	1.90493	0	0	0	0	0	3.72915	0	0	0	0	0	0.024282	0	0	0	0	0	0.0298729	0	0	0	3	52
		C74H133O24P	0	0	0.663094	0	0	0	0	0	0	0	0	0	0	0	0.00845242	0	0	0	0	0	0	0	0	0	3	53
		C74H135O24P	0	0	0	6.41547	7.2485	0	0	0	0	0	0	0	0	0	0	0.0319647	0.0384832	0	0	0	0	0	0	0	2	53
		C74H137O24P	0	0	0	0	0	0	0	0	0.359074	0	0	0	0	0	0	0	0	0	0	0	0.00287641	0	0	0	1	53
		C74H139O24P	0	0	0	0	0	0	0	0	0.601153	0	0	0	0	0	0	0	0	0	0	0	0.00481562	0	0	0	0	53
		C75H139O24P	0	0	0	0	0	0	0	0	0	0	0	1830.6	0	0	0	0	0	0	0	0	0	0	0	0.0533155	1	54
		C76H137O24P	0	0	0	0	0	2.54872	0	0	0	0	0	0	0	0	0	0	0	0.0190371	0	0	0	0	0	0	3	55
		C76H139O24P	0	0	0	0	0	0.301187	0	0	0	0	0	0	0	0	0	0	0	0.00224965	0	0	0	0	0	0	2	55
		C76H141O24P	0	0	0	0	0	0	0	0	16.5625	0	0	3553.91	0	0	0	0	0	0	0	0	0.132676	0	0	0.103506	1	55
		C77H143O24P	0	0	0.896999	0	0	0	0	0	0	0	0	0	0	0	0.011434	0	0	0	0	0	0	0	0	0	1	56
		C78H139O24P	0	0	0	0	0	1.27854	0	0	0	0	0	0	0	0	0	0	0	0.00954979	0	0	0	0	0	0	4	57
		C78H145O24P	0	0	0	0	0	7.62433	0	0	0	0	0	0	0	0	0	0	0	0.0569483	0	0	0	0	0	0	1	57
	AC1PIM3	C75H133O29P	0	0	0.0889652	0	0	0	0	0	0	0	0	0	0	0	0.00113403	0	0	0	0	0	0	0	0	0	3	48
		C75H137O29P	0	0	0	0	0	0	0.612483	0.632617	0	0	0	0	0	0	0	0	0	0	0.0040433	0.00518273	0	0	0	0	1	48
		C76H139O29P	0	0	0	0	0	0.0644359	0	0	0	0	0	0	0	0	0	0	0	0.00048129	0	0	0	0	0	0	1	49
		C76H141O29P	0	0	0	0	0	0	0	0	0	0	0	375.746	0	0	0	0	0	0	0	0	0	0	0	0.0109434	0	49
		C77H133O29P	0	0	0	0	0	0	0	0	0	0.359299	0	0	0	0	0	0	0	0	0	0	0	0.00281921	0	0	5	50
		C77H143O29P	12.7362	17.5184	3.51666	0	0	0	14.2097	18.4834	5.83576	2.89653	3.22331	0	0.0455835	0.0893662	0.0448267	0	0	0	0.0938049	0.151425	0.0467481	0.0227274	0.0262481	0	0	50
		C78H145O29P	0	0	1.36393	0	0	0.196244	0	0	10.2414	0	0	123.319	0	0	0.017386	0	0	0.0014658	0	0	0.0820405	0	0	0.0035916	0	51
		C80H143O29P	0	0	0.642952	0	0	0	0	0	0	0	0	0	0	0	0.00819567	0	0	0	0	0	0	0	0	0	3	53
		C82H151O25P	0	0	0	3.88148	0	0	0	0	0	0	0	0	0	0	0	0.0193392	0	0	0	0	0	0	0	0	1	55
		C84H149O29P	1.24125	0	0	0	0	0	0	0	0	0	0	0	0.00444248	0	0	0	0	0	0	0	0	0	0	0	4	57
		C84H153O29P	0	0	0	0	0	3.45218	0	0	0	0	0	0	0	0	0	0	0	0.0257853	0	0	0	0	0	0	2	57
		C84H155O29P	0	0	0	13.5313	11.3452	0	0	0	0	0	0	0	0	0	0	0.0674187	0.0602329	0	0	0	0	0	0	0	1	57
	AC1PIM4	C82H151O34P	0	0	0.013129	0	0	0	0	0	0	0	0	0	0	0	0.000167354	0	0	0	0	0	0	0	0	0	0	49
		C83H151O34P	0	0	0.886087	0	0	0.0702499	0	0	0	0	0	0	0	0	0.0112949	0	0	0.000524716	0	0	0	0	0	0	1	50
		C84H155O34P	0	0	0.184489	0	0	2.37838	0	0	0	0	62.2453	0	0	0	0.00235167	0	0	0.0177648	0	0	0	0	0	0.00181286	0	51
		C86H157O34P	0	0	0	0	0	0	0	0	0.135733	0	0	0	0	0	0	0	0	0	0	0	0.0010873	0	0	0	1	53
	AC1PIM5	C89H161O39P	0	0	0.0712135	0	0	2.21563	0	0	0	0	0	0	0	0	0.000907754	0	0	0.0165491	0	0	0	0	0	0	1	50
		C90H165O39P	0	0	1.69488	0	0	0.0632733	0	0	0.135297	0	0	0	0	0	0.0216045	0	0	0.000472606	0	0	0.00108382	0	0	0	0	51
	AC1PIM6	C93H169O44P	0	0	0.167493	0	0	0.0348302	0	0	0	0	0	0	0	0	0.00213502	0	0	0.000260157	0	0	0	0	0	0	0	48
		C94H171O44P	0	0	0.93983	0	0	0	0	0	0.0528893	0	0	40.7706	0	0	0.01198	0	0	0	0	0	0.000423677	0	0	0.00118742	0	49
		C95H171O44P	0	0	0.275134	0	0	9.34724	0	0	6.32939	0	0	0	0	0	0.00350711	0	0	0.0698172	0	0	0.0507025	0	0	0	1	50
		C96H175O44P	0	0	0.285634	0	0	7.77392	0	0	11.347	0	0	224.947	0	0	0.00364096	0	0	0.0580656	0	0	0.090897	0	0	0.00655146	0	51
		C97H169O44P	0	0	0.00863629	0	0	0.106878	0	0	0	0	0	0	0	0	0.000110086	0	0	0.000798298	0	0	0	0	0	0	4	52
		C98H173O44P	0	0	0.736863	0	0	0.784595	0	0	0	0	0	257.568	0	0	0.00939275	0	0	0.00586036	0	0	0	0	0	0.00750156	3	53
	AC2PIM1	C84H159O20P	0	0	0	0	0	0	0	0	0	0	0	1440.07	0	0	0	0	0	0	0	0	0	0	0	0.0419413	0	69
	AC2PIM2	C82H153O25P	0	0	0	0	0	2.96859	0	0	0	0	0	0	0	0	0	0	0	0.0221733	0	0	0	0	0	0	0	61
		C84H151O25P	0	0	0	0	0	12.0655	0	0	0	0	0	0	0	0	0	0	0	0.0901205	0	0	0	0	0	0	3	63
		C84H153O25P	0	0	0	0	0	0	0.984385	0.900877	0	0	0	0	0	0	0	0	0	0	0.0064984	0.00738045	0	0	0	0	2	63
		C85H151O25P	0	0	0.820552	0	0	0	0	0	0	0	0	0	0	0	0.0104595	0	0	0	0	0	0	0	0	0	4	64
		C85H153O25P	0	0	0	0	0	0	0	0	0.907195	0	0	0	0	0	0	0	0	0	0	0	0.00726721	0	0	0	3	64
		C86H161O25P	0	0	0	0	0	75.7751	0	0	0	0	0	0	0	0	0	0	0	0.565986	0	0	0	0	0	0	0	65
		C87H153O25P	0	0	0	0	0	0.33074	0	0	0	0	0	0	0	0	0	0	0	0.00247039	0	0	0	0	0	0	5	66
		C87H157O25P	0	0	1.00986	0	0	0	0	0	0	0	0	0	0	0	0.0128726	0	0	0	0	0	0	0	0	0	3	66
		C88H165O25P	0	0	0	0	0	22.7888	0	0	0.515153	0	0	0	0	0	0	0	0	0.170216	0	0	0.00412671	0	0	0	0	67
		C89H157O25P	0	0	0.484719	0	0	0	0	0	0	0	0	0	0	0	0.00617868	0	0	0	0	0	0	0	0	0	5	68
		C89H159O25P	0	0	0	0	0	0	0	0	0.817447	0	0	0	0	0	0	0	0	0	0	0	0.00654827	0	0	0	4	68
		C89H163O25P	0	0	0	0	0	0	0	0	3.82758	0	0	0	0	0	0	0	0	0	0	0	0.0306614	0	0	0	2	68
		C89H165O25P	0	0	0	0	0	0	0	0	0.607286	0	0	265.82	0	0	0	0	0	0	0	0	0.00486475	0	0.442627	0.00774187	1	68
		C91H165O25P	0	0	0	0	0	2.14212	0	0	0	0	0	0	0	0	0	0	0	0.0160001	0	0	0	0	0	0	3	70
		C92H171O25P	0	0	0.13789	0	0	0.238873	0	0	0	0	0	0	0	0	0.00175767	0	0	0.00178421	0	0	0	0	0	0	1	71
		C94H169O25P	0	0	0	0	0	0.1291	0	0	1.36225	0	0	0	0	0	0	0	0	0.000964286	0	0	0.0109125	0	0	0	4	73
		C94H173O25P	0	0	0	0	0	0	0	0	10.9394	0	0	0	0	0	0	0	0	0	0	0	0.0876317	0	0	0	2	73
		C96H173O25P	0	0	0	0	0	0.315847	0	0	0	0	0	0	0	0	0	0	0	0.00235915	0	0	0	0	0	0	4	75
		C96H175O25P	0	0	0	0	0	0	0	0	1.35122	0	0	0	0	0	0	0	0	0	0	0	0.0108241	0	0	0	3	75
	AC2PIM3	C89H159O30P	0	0	0	0	0	0	0	0	3.96519	0	0	0	0	0	0	0	0	0	0	0	0.0317637	0	0	0	3	62
		C91H163O30P	3.45569	3.02249	0	0	0	0	5.49115	4.85135	0	0	0	0	0.0123681	0.0154185	0	0	0	0	0.0362498	0.0397447	0	0	0	0	3	64
		C92H169O30P	0	0	0	0	0	3.38329	0	0	0	0	0	0	0	0	0	0	0	0.0252707	0	0	0	0	0	0	1	65
		C93H167O30P	0	0	0.135965	0	0	0	0	0	0	0	0	0	0	0	0.00173313	0	0	0	0	0	0	0	0	0	3	66
		C93H173O30P	0	0	0	0	0	0	0	0	0	0	0	179.991	0	0	0	0	0	0	0	0	0	0	0	0.00524214	0	66
		C94H167O30P	0	0	0	0	0	0	0.591665	0.275151	0	0	0	141.187	0	0	0	0	0	0	0.00390587	0.00225418	0	0	0	0.00411199	4	67
		C94H171O30P	0	0	0	0	0	1.5438	0	0	0	0	0	0	0	0	0	0	0	0.0115311	0	0	0	0	0	0	2	67
		C94H173O30P	0	0	0	0	0	0	1.78452	1.64367	0	0	0	0	0	0	0	0	0	0	0.0117805	0.0134658	0	0	0	0	1	67
		C94H175O30P	0	0	0	0	0	0	0	0	0	2.75601	2.734	0	0	0	0	0	0	0	0	0	0	0.0216248	0.0222635	0	0	67
		C96H175O30P	0	0	0	0	0	0	0	0	0.608237	0	0	0	0	0	0	0	0	0	0	0	0.00487237	0	0	0	2	69
		C97H177O30P	0	0	1.10921	0	0	0.0932361	0	0	0	0	0	0	0	0	0.014139	0	0	0.000696407	0	0	0	0	0	0	2	70
		C97H181O30P	0	0	0	0	0	0.623968	0	0	1.00283	0	0	2205.07	0	0	0	0	0	0.00466059	0	0	0.0080333	0	0	0.0642217	0	70
		C99H181O30P	0	0	0.186502	0	0	0	0	0	0	0	0	54.3504	0	0	0.00237733	0	0	0	0	0	0	0	0	0.00158293	2	72
		C100H177O30P	0	0	0	0	0	0	0	0	0	0	0	257.019	0	0	0	0	0	0	0	0	0	0	0	0.00748555	5	73
		C100H181O30P	0	0	0	0	0	0.127796	0	0	0	0	0	0	0	0	0	0	0	0.000954547	0	0	0	0	0	0	3	73
		C101H183O30P	0	0	0.2917	0	0	0	0	0	0	0	0	0	0	0	0.00371828	0	0	0	0	0	0	0	0	0	3	74
		C102H185O30P	0	0	0	0	0	0	0	0	7.39372	0	0	0	0	0	0	0	0	0	0	0	0.0592284	0	0	0	3	75
	AC2PIM4	C96H177O35P	0	0	0	0	0	0.997376	0	0	0	0	0	0	0	0	0	0	0	0.00744968	0	0	0	0	0	0	0	63
		C98H179O35P	0	0	0	0	0	1.24376	0	0	0	0	0	0	0	0	0	0	0	0.00929002	0	0	0	0	0	0	1	65
		C100H185O35P	0	0	0	0	0	0	0	0	2.48897	0	0	0	0	0	0	0	0	0	0	0	0.0199383	0	0	0	0	67
		C102H185O35P	0	0	0.110712	0	0	0	0	0	0	0	0	0	0	0	0.00141124	0	0	0	0	0	0	0	0	0	2	69
		C104H187O35P	0	0	0	0	0	0	0	0	0.813198	0	0	68.0373	0	0	0	0	0	0	0	0	0.00651424	0	0	0.00198155	3	71
		C104H193O35P	0	0	0	0	0	0.351386	0	0	0	0	0	0	0	0	0	0	0	0.0026246	0	0	0	0	0	0	0	71
		C107H197O35P	0	0	0.870346	0	0	0	0	0	0	0	0	0	0	0	0.0110942	0	0	0	0	0	0	0	0	0	1	74
	AC2PIM5	C100H181O40P	0	0	0	0	0	0	0	0	0	0	0	20.9794	0	0	0	0	0	0	0	0	0	0	0	0.000611014	1	61
ScL	GPL-I	C66H108N4O17	0	0	0	15.0277	611.111	0	733.279	675.1	0	45.9094	18.8651	0	0	0	0	0.0748744	3.24447	0	4.84073	5.53077	0	0.360225	0.153622	0	3	28
		C66H112N4O17	0	0	0	326.994	32.5146	35.9524	677.253	332.34	0	0	0	0	0	0	0	1.62923	0.172624	0.268538	4.47088	2.7227	0	0	0	0	1	28
		C66H114N4O17	0	447.161	0	0	0	180.491	66.462	35.8765	741.078	28.7657	149.978	231294	0	2.28108	0	0	0	1.34814	0.438748	0.293919	5.93651	0.225708	1.2213	6.73634	0	28
		C67H110N4O17	0	18.3724	0	436.885	540.642	29.0985	245.433	263.906	39.174	19.844	112.576	2071.21	0	0.0937226	0	2.17675	2.87034	0.217345	1.62023	2.16205	0.313809	0.155705	0.91673	0.060323	3	29
		C67H112N4O17	0	0	0	0	37.2167	0	0	0	0	0	0	0	0	0	0	0	0.197588	0	0	0	0	0	0	0	2	29
		C67H114N4O17	0	0	0	579.542	411.008	339.98	0	91.2084	208.487	0	0	0	0	0	0	2.88753	2.18209	2.53941	0	0.747226	1.67011	0	0	0	1	29
		C67H116N4O17	11.2417	0.939688	0	0	1074.86	0	26.8708	62.8493	111.397	386.44	255.493	32340.4	0.0402346	0.00479359	0	0	5.70656	0	0.177388	0.514894	0.892365	3.03217	2.08053	0.941899	0	29
		C68H110N4O17	0	0	0	210.209	1.33709	0.758741	331.049	69.6376	0	0	0	0	0	0	0	1.04736	0.00709877	0.00566725	2.18542	0.570507	0	0	0	0	4	30
		C68H112N4O17	0	0	0	0	0	4.43996	16.1059	317.546	0	6.55137	44.9436	0	0	0	0	0	0	0.0331633	0.106323	2.6015	0	0.0514048	0.365985	0	3	30
		C68H114N4O17	0	0	0	0	27.21	0	0	20.907	0	0	0	0	0	0	0	0	0.144461	0	0	0.171281	0	0	0	0	2	30
		C68H116N4O17	0	0	88.7189	1125.17	0	60.4099	116.972	137.011	176.184	0	0	0	0	0	1.13089	5.60608	0	0.451219	0.772192	1.12247	1.41134	0	0	0	1	30
		C68H118N4O17	14.3315	2.6386	0	0	0	0	18.2486	6.14075	11.3844	0	0	167394	0.0512932	0.0134602	0	0	0	0	0.120468	0.0503082	0.0911966	0	0	4.87526	0	30
		C69H112N4O17	0	0	0	200.138	0.54507	32.3594	37.7899	30.822	10.8658	0	0	0	0	0	0	0.997177	0.00289385	0.241702	0.24947	0.25251	0.087042	0	0	0	4	31
		C69H114N4O17	381.024	5.84912	0	0	4.65459	0	83.1599	35.6955	0	38.4664	36.5678	0	1.3637	0.0298379	0	0	0.0247118	0	0.548979	0.292436	0	0.301823	0.297779	0	3	31
		C69H116N4O17	0	0	0	0	0	12.0757	0	0	0	0	0	0	0	0	0	0	0	0.0901968	0	0	0	0	0	0	2	31
		C69H118N4O17	102.903	0	0	0	0	32.6602	31.535	9.87275	209.77	126.905	122.934	0	0.368294	0	0	0	0	0.243948	0.208178	0.0808827	1.68039	0.995754	1.00108	0	1	31
		C69H120N4O17	0	1.41392	0	0	0	0	0	0	0	0	0	80141.3	0	0.00721276	0	0	0	0	0	0	0	0	0	2.33408	0	31
		C70H114N4O17	1.52266	21.7036	1.63118	0	0	0	10.5757	16.4102	55.3224	7.90116	60.8868	0	0.00544965	0.110716	0.0207926	0	0	0	0.0698155	0.134441	0.443168	0.0619959	0.495813	0	4	32
		C70H116N4O17	17.7108	8.78754	0	0	0	0	37.5814	74.2478	8.68387	50.0725	9.07789	2326.78	0.0633879	0.0448275	0	0	0	0	0.248093	0.608276	0.0695634	0.39289	0.073923	0.0677664	3	32
		C70H120N4O17	70.0744	0	0	0	0	0	91.703	11.4074	21.6883	17.8077	13.4922	79595.5	0.250799	0	0	0	0	0	0.605376	0.093455	0.173737	0.139727	0.10987	2.31818	1	32
		C70H122N4O17	0	0	0	0	0	0	0	0	3.92493	0	0	10747.9	0	0	0	0	0	0	0	0	0.0314412	0	0	0.313028	0	32
		C71H116N4O17	8.36587	0	0	0	0	0	27.2016	49.4268	2.08011	3.49824	4.18082	0	0.0299418	0	0	0	0	0	0.179571	0.40493	0.016663	0.0274487	0.0340452	0	4	33
		C71H118N4O17	20.0837	10.4075	0	12.989	8.16245	0	0	0	0.865592	0	0	3304.26	0.0718804	0.0530913	0	0.0647171	0.0433355	0	0	0	0.00693394	0	0	0.096235	3	33
		C71H122N4O17	0	0	0	10.7744	79.5691	0	0	0	8.92861	24.6229	21.6354	41613.5	0	0	0	0.0536828	0.422442	0	0	0	0.0715239	0.193202	0.176182	1.21197	1	33
		C72H118N4O17	0.684796	0	0	0	0	0	14.2544	2.13362	3.65822	78.3482	70.1201	2512.88	0.00245092	0	0	0	0	0	0.0941001	0.0174797	0.0293047	0.614753	0.571002	0.0731863	4	34
		C72H120N4O17	0	0	0	0	6.8602	0	0	0	0	0	0	0	0	0	0	0	0.0364217	0	0	0	0	0	0	0	3	34
		C72H124N4O17	0	0	0	0	0	0	0	0	0	0	0	1698.9	0	0	0	0	0	0	0	0	0	0	0	0.0494796	1	34
		C73H120N4O17	0	0	0	1.97983	0	0	0	0	0	0	0	0	0	0	0	0.00986437	0	0	0	0	0	0	0	0	4	35
		C73H124N4O17	0	0	0	0	0	0	0	0	0	0	0	1084.69	0	0	0	0	0	0	0	0	0	0	0	0.0315911	2	35
		C73H126N4O17	0	0	0.6227	0	0	0	0	0	6.94098	0	0	0	0	0	0.00793751	0	0	0	0	0	0.0556017	0	0	0	1	35
		C74H122N4O17	10.3323	0	4.58576	0	3.23671	0	2.38852	1.61239	0	0	0	0	0.0369796	0	0.0584543	0	0.0171841	0	0.0157678	0.0132096	0	0	0	0	4	36
		C75H124N4O17	0	0	0	0	0	0	0	3.88671	0	0	0	0	0	0	0	0	0	0	0	0.0318419	0	0	0	0	4	37
		C75H126N4O17	0	0	0	0	0	0	57.7831	10.7336	0	0	0	0	0	0	0	0	0	0	0.381454	0.0879352	0	0	0	0	3	37
		C75H128N4O17	0	0	0	0	0	0	0	0	0	31.2313	1.74481	0	0	0	0	0	0	0	0	0	0	0.245054	0.0142083	0	2	37
		C75H130N4O17	0	0	0	0	0	0	0	0	17.0622	0	0	0	0	0	0	0	0	0	0	0	0.136679	0	0	0	1	37
		C75H132N4O17	0	0	0	0	0	0	0	0	9.47481	0	5.23118	0	0	0	0	0	0	0	0	0	0.0758993	0	0.0425985	0	0	37
		C76H126N4O17	0	0	0	0	0	3.23511	0	0	0	0	0	0	0	0	0	0	0	0.0241639	0	0	0	0	0	0	4	38
		C76H132N4O17	0	0	0	0	0	0	2.39742	0.91408	0	0.378499	3.41862	0	0	0	0	0	0	0	0.0158265	0.00748861	0	0.00296987	0.0278385	0	1	38
		C77H132N4O17	0	0	0	0	0	0	0	0	0	4.52365	0	0	0	0	0	0	0	0	0	0	0	0.0354945	0	0	2	39
	GPL-IIa/IV	C61H106N4O15	0	0	0	0	0	0	0	0	1.60729	0	0	5009.68	0	0	0	0	0	0	0	0	0.0128755	0	0	0.145904	1	28
		C62H104N4O15	0	0	0	0	0	0	0	0	3.36183	17.1942	0	0	0	0	0	0	0	0	0	0	0.0269304	0.134913	0	0	3	29
		C62H110N4O15	410.854	0.980613	0	0	0	0	0	0	0	0	0	88488.5	1.47047	0.00500236	0	0	0	0	0	0	0	0	0	2.57719	0	29
		C62H108N4O15	0	0	0	0	0	0	0	0	0	34.2115	0	0	0	0	0	0	0	0	0	0	0	0.268438	0	0	1	29
		C63H106N4O15	0	0	0	1.38082	0	0	0	0	0	0	0	0	0	0	0	0.00687986	0	0	0	0	0	0	0	0	3	30
		C63H112N4O15	21.4749	0	0	0	0	0	0	0	0	0	0	4301.97	0.0768596	0	0	0	0	0	0	0	0	0	0	0.125293	0	30
		C64H106N4O15	0	0	0	0	0	0	0	0	0	19.8726	38.7486	486.494	0	0	0	0	0	0	0	0	0	0.155929	0.315537	0.0141689	4	31
		C64H108N4O15	0	0	96.7753	0	0	0	0	0	23.0747	0	0	0	0	0	1.23359	0	0	0	0	0	0.184843	0	0	0	3	31
		C64H110N4O15	0	0	0	0	0	0	0	0	5.81283	0	0	0	0	0	0	0	0	0	0	0	0.0465645	0	0	0	2	31
		C64H114N4O15	0	0	0	0	1.8319	0	0	0	0	0	0	43962.2	0	0	0	0	0.0097258	0	0	0	0	0	0	1.28038	0	31
		C65H110N4O15	43.4393	0	0	0	0	0	0	0	0	0	0	0	0.155471	0	0	0	0	0	0	0	0	0	0	0	3	32
		C65H114N4O15	497.297	0	0	0	0	0	0	0	0	0	0	0	1.77985	0	0	0	0	0	0	0	0	0	0	0	1	32
		C65H116N4O15	0	0	0	0	0	319.121	0	0	0	0	0	117255	0	0	0	0	0	2.38361	0	0	0	0	0	3.41501	0	32
		C67H112N4O15	0.840091	0	0	0	0	0	0	0	0	0	0	0	0.00300672	0	0	0	0	0	0	0	0	0	0	0	4	34
		C69H118N4O15	0	0	0	0	0	0	0	0	0.445433	0	0	0	0	0	0	0	0	0	0	0	0.0035682	0	0	0	3	36
		C71H120N4O15	0	0	0	0	0	0	0	0	0.510663	0	0	0	0	0	0	0	0	0	0	0	0.00409074	0	0	0	4	38
		C73H126N4O21	0	0	0	0	0.429717	0	0	0	0	0	0	0	0	0	0	0	0.00228142	0	0	0	0	0	0	0	0	28
		C74H122N4O21	0	0	0	0	2.18516	0	6.95014	3.52939	0	0	0	0	0	0	0	0	0.0116013	0	0.0458813	0.0289146	0	0	0	0	3	29
		C74H126N4O21	0	0	0	0	2.062	0	0	0	0	0	0	0	0	0	0	0	0.0109474	0	0	0	0	0	0	0	1	29
		C75H122N4O21	0	40.1672	0	0	3.5056	0	0	0	0	0	0	0	0	0.204903	0	0	0.0186117	0	0	0	0	0	0	0	4	30
		C76H124N4O21	0.802314	0	0	0	0.441249	0	11.1613	4.15983	0	0	0	0	0.00287152	0	0	0	0.00234265	0	0.0736815	0.0340795	0	0	0	0	4	31
		C77H126N4O21	0	0	0	0	0	0	8.57448	0	0	0	0	0	0	0	0	0	0	0	0.0566043	0	0	0	0	0	4	32
		C78H130N4O21	34.2562	1.10901	0	0	0	0	7.71322	9.27818	0	12.354	14.0106	0	0.122604	0.00565736	0	0	0	0	0.0509187	0.0760116	0	0.0969349	0.114091	0	3	33
		C79H130N4O21	0	0	0	0	0	0	0	0	0	0.558954	0.413272	0	0	0	0	0	0	0	0	0	0	0.00438579	0.00336535	0	4	34
		C79H138N4O21	0	0	0	0	0.851531	0	0	0	0	0	0	0	0	0	0	0	0.00452088	0	0	0	0	0	0	0	0	34
		C80H132N4O21	0	0	0	0	1.25385	0	0	0	0	0	0	0	0	0	0	0	0.00665687	0	0	0	0	0	0	0	4	35
		C81H134N4O21	0	0	0	0	0	0	36.0785	8.07819	0	0	0	0	0	0	0	0	0	0	0.238172	0.0661807	0	0	0	0	4	36
		C82H136N4O21	0	0	0	0	0	0	0.878035	41.3556	0	0	0	0	0	0	0	0	0	0	0.00579634	0.338807	0	0	0	0	4	37
		C83H142N4O21	0	0	0	0	0	0	4.98574	4.73766	0	0	0	0	0	0	0	0	0	0	0.0329133	0.0388133	0	0	0	0	2	38
	GPL-IIb	C74H122N4O21	0	0	0	0	0	0	0	0	2.0183	0	0	0	0	0	0	0	0	0	0	0	0.0161679	0	0	0	3	29
		C75H128N4O21	0	0	0	0	0	6.80571	0	0	0	0	0	0	0	0	0	0	0	0.0508338	0	0	0	0	0	0	1	30
		C76H132N4O21	0	0	25.6311	0	0	0	0	0	0	0	0	0	0	0	0.326718	0	0	0	0	0	0	0	0	0	0	31
		C78H130N4O21	0	0	0.708868	0	0	0	0	0	63.2053	0	0	0	0	0	0.00903589	0	0	0	0	0	0.506315	0	0	0	3	33
		C80H136N4O21	0	0	1.18385	0	0	0	0	0	0	0	0	0	0	0	0.0150905	0	0	0	0	0	0	0	0	0	2	35
		C80H140N4O21	0	0	0.418866	0	0	0	0	0	0	0	0	0	0	0	0.00533926	0	0	0	0	0	0	0	0	0	0	35
		C81H140N4O21	0	0	0	0	0	4.32844	0	0	0	0	0	0	0	0	0	0	0	0.0323304	0	0	0	0	0	0	1	36
		C82H138N4O21	0	0	2.35789	0	0	0	0	0	0	0	0	0	0	0	0.0300559	0	0	0	0	0	0	0	0	0	3	37
		C82H142N4O21	0	0	0	0	0	0	0	0	0	0	0	273.708	0	0	0	0	0	0	0	0	0	0	0	0.00797162	1	37
		C83H146N4O21	0	0	0	0	0	1.53241	0	0	0	0	0	0	0	0	0	0	0	0.011446	0	0	0	0	0	0	0	38
		C84H142N4O21	0	0	2.32432	0	0	1.87398	0	0	0	0	0	0	0	0	0.0296279	0	0	0.0139973	0	0	0	0	0	0	3	39
	GPL-IIIa	C69H108N4O20	0	0	0.732023	0	0	0	0	0	0	0	0	0	0	0	0.00933105	0	0	0	0	0	0	0	0	0	4	28
		C69H114N4O20	0	0	0	0	0	0	0	0	0	65.3051	66.7223	0	0	0	0	0	0	0	0	0	0	0.512411	0.543333	0	1	28
		C70H118N4O20	265.717	305.701	0	0.837722	0.896897	0	0	0	0	0	0	0	0.951012	1.55946	0	0.0041739	0.00476174	0	0	0	0	0	0	0	0	29
		C71H114N4O20	7.72384	1.7596	0	0	0	0	244.26	256.9	0	2.93586	2.17111	0	0.027644	0.00897617	0	0	0	0	1.61248	2.10466	0	0.023036	0.0176798	0	3	30
		C72H118N4O20	0	0	0	0	0	0	0	0	2.12205	0	0	0	0	0	0	0	0	0	0	0	0.016999	0	0	0	2	31
		C72H122N4O20	0	1.12411	0	0	0	0	8.07072	4.10427	0	0	0	0	0	0.00573437	0	0	0	0	0.0532788	0.0336243	0	0	0	0	0	31
		C73H124N4O20	0	0	0	0	0	0.256513	0	0	0	0	0	0	0	0	0	0	0	0.00191597	0	0	0	0	0	0	0	32
		C74H120N4O20	0	0	0	0	0	0	1.75679	13.4572	0	0	0	0	0	0	0	0	0	0	0.0115974	0.110249	0	0	0	0	3	33
		C74H122N4O20	0	0	0	0	0	0.131443	0	0	0	0	0	0	0	0	0	0	0	0.000981782	0	0	0	0	0	0	2	33
		C74H126N4O20	0	0	0	0	0	1.43026	0	0	0	0	0	0	0	0	0	0	0	0.010683	0	0	0	0	0	0	0	33
		C75H122N4O20	0	0	0	0	0	0	15.681	0	0	0	0	0	0	0	0	0	0	0	0.103518	0	0	0	0	0	3	34
		C75H126N4O20	1.49639	0	0	0	0	0	0	0	0	0	0	0	0.00535566	0	0	0	0	0	0	0	0	0	0	0	1	34
		C76H126N4O20	35.2122	40.5046	31.8783	0	0	0	0.316389	38.6261	52.0347	4.57979	3.93283	0	0.126026	0.206625	0.406351	0	0	0	0.00208864	0.316445	0.416831	0.035935	0.0320258	0	2	35
		C76H128N4O20	0	0	0	0	0	0	0	6.58453	0	0	0	0	0	0	0	0	0	0	0	0.0539438	0	0	0	0	1	35
		C76H130N4O20	0	0	0	0	0	0.554038	0	0	0	0	0	0	0	0	0	0	0	0.00413826	0	0	0	0	0	0	0	35
		C77H128N4O20	4.92955	0	0	0	0	0	0	0	0	0	0	0	0.0176431	0	0	0	0	0	0	0	0	0	0	0	2	36
		C77H132N4O20	0	0	36.7962	0	0	2.34629	0	0	0.589749	0	0	421.869	0	0	0.469038	0	0	0.0175251	0	0	0.00472427	0	0	0.0122867	0	36
		C78H126N4O20	0	0	0	5.31192	0	0	0	0	0	0	0	0	0	0	0	0.0264663	0	0	0	0	0	0	0	0	4	37
		C78H134N4O20	0	0	0.198416	0	0	0	0	0	0	0	0	0	0	0	0.00252919	0	0	0	0	0	0	0	0	0	0	38
		C79H130N4O20	0	0	0	0	0	0	34.7724	0.249161	0	1.17551	0.815442	0	0	0	0	0	0	0	0.22955	0.00204125	0	0.00922357	0.0066403	0	3	38
		C79H132N4O20	0	0	0	0	0	1.05331	0	0	0	0	0	0	0	0	0	0	0	0.00786748	0	0	0	0	0	0	2	38
		C80H130N4O20	0	0	0	0	0	0	0	0	0	1.07417	0	0	0	0	0	0	0	0	0	0	0	0.00842843	0	0	4	39
		C80H132N4O20	0	0	0	0	0	0	7.21907	5.53956	0	0	0	0	0	0	0	0	0	0	0.0476566	0.0453829	0	0	0	0	3	39
		C80H134N4O20	0	0	2.57754	0	0	0	0	0	0	0	0	693.072	0	0	0.0328557	0	0	0	0	0	0	0	0	0.0201854	2	39
	GPL-IIIb	C77H124N4O24	0	0	0	0	0	0	1.21932	1.15196	0	0	0	0	0	0	0	0	0	0	0.00804931	0.00943749	0	0	0	0	3	28
		C86H142N4O24	0	0	0	13.034	0	0	0	0	0	0	0	0	0	0	0	0.0649413	0	0	0	0	0	0	0	0	3	37
		C88H146N4O24	0	0	0	0	0	0	0	0	9.07938	0	0	0	0	0	0	0	0	0	0	0	0.0727316	0	0	0	3	39
	GPL-V/VI	C69H121N4O19	0	0	0	0	0	14.7096	0	0	0	0	0	2817.68	0	0	0	0	0	0.10987	0	0	0	0	0	0.0820637	1	28
		C69H123N4O19	0	0	0	0	0	4.30952	0	0	0	0	0	0	0	0	0	0	0	0.032189	0	0	0	0	0	0	0	28
		C70H121N4O19	0	0	0	0	0	0	0	0	0	0	0	3424.91	0	0	0	0	0	0	0	0	0	0	0	0.0997487	2	29
		C70H125N4O19	0	2.25457	0	5.97406	7.27405	0	1.20316	1.98911	0	2.81292	12.3873	0	0	0.0115012	0	0.0297654	0.0386188	0	0.00794265	0.0162958	0	0.0220714	0.100872	0	0	29
		C71H119N4O19	0	0	0.559429	0	0	0	0	0	0	0	0	0	0	0	0.00713101	0	0	0	0	0	0	0	0	0	4	30
		C71H123N4O19	0	0	2.11117	0	0	0	0	112.345	28.1274	0	0	2202.5	0	0	0.0269109	0	0	0	0	0.920386	0.225319	0	0	0.0641467	2	30
		C72H121N4O19	0	0	0	0	0	0	104.005	0	0	0	0	0	0	0	0	0	0	0	0.686585	0	0	0	0	0	4	31
		C72H123N4O19	35.0379	80.5918	0	96.2507	18.5854	0	0	0	0	25.1785	12.9294	0	0.125402	0.41112	0	0.479563	0.0986722	0	0	0	0	0.197561	0.105287	0	3	31
		C72H125N4O19	4.45341	27.7256	36.1785	0	0	0	0	0	0	0	0	0	0.015939	0.141436	0.461165	0	0	0	0	0	0	0	0	0	2	31
		C73H129N4O19	0	0	0	0	0	0	0	0	868.258	0	0	0	0	0	0	0	0	0	0	0	6.9553	0	0	0	1	32
		C75H127N4O19	0	0	0	0	0	8.70376	0	0	0	0	0	0	0	0	0	0	0	0.0650108	0	0	0	0	0	0	4	34
		C75H129N4O19	0	0	0	742.986	34.9059	0	0	0	0	0	0	0	0	0	0	3.70189	0.18532	0	0	0	0	0	0	0	3	34
		C75H135N4O19	0	0	0	0	0	0	0	0	0	47.8636	23.4947	0	0	0	0	0	0	0	0	0	0	0.375558	0.191322	0	0	34
		C76H135N4O19	0	0	11.5001	0	0	0	0	0	0	0	0	560.64	0	0	0.146591	0	0	0	0	0	0	0	0	0.0163284	1	35
		C77H131N4O19	0	0	0	0	0	0	0	0	0	0	0	6241.25	0	0	0	0	0	0	0	0	0	0	0	0.181773	4	36
		C77H137N4O19	0	0	0	0	0	0	0	0	2.72019	0	0	0	0	0	0	0	0	0	0	0	0.0217904	0	0	0	1	36
		C79H139N4O19	0	0	0	0	0	370.015	0	0	0	0	0	2138.9	0	0	0	0	0	2.76374	0	0	0	0	0	0.0622944	2	38
		C79H141N4O19	0	0	0	0	0	0	0	0	2.5772	0	0	0	0	0	0	0	0	0	0	0	0.020645	0	0	0	1	38
		C80H141N4O19	0	0	4.1516	0	0	4.52929	0	0	0	0	0	0	0	0	0.0529202	0	0	0.0338306	0	0	0	0	0	0	2	39
	GPL-s1	C35H53N5O11	0	0	0	0	0	0	0	0	0.532681	0	0	0	0	0	0	0	0	0	0	0	0.00426711	0	0	0	0	5
		C67H116N4O19	0	0	0	0	0	0	148.745	3.0155	0	68.8774	34.173	0	0	0	0	0	0	0	0.981937	0.0247045	0	0.540441	0.278277	0	1	28
		C67H118N4O19	0	0	0	139.791	0	0	0	0	0	0	0	0	0	0	0	0.696501	0	0	0	0	0	0	0	0	0	28
		C68H116N4O19	0	0	0	0	49.1378	0	0	0	0	0	0	0	0	0	0	0	0.260879	0	0	0	0	0	0	0	2	29
		C68H118N4O19	50.0109	0	0	0	0	0	0	0	0	0	0	0	0.178991	0	0	0	0	0	1.31005	0	0	0	0	0	1	29
		C69H118N4O19	0	0	0	0	26.6097	0	0	0	0	0	0	0	0	0	0	0	0.141274	0	0	0	0	0	0	0	2	30
		C69H122N4O19	0	0	0	0	0	0	0	0	0	0	0	1907.01	0	0	0	0	0	0	0	0	0	0	0	0.0555407	0	30
		C70H124N4O19	0	39.859	0	1077.87	3.03402	0	5.4871	3.14399	0	35.1574	12.9474	0	0	0.203331	0	5.37044	0.016108	0	0.036223	0.0257572	0	0.27586	0.105433	0	0	31
		C72H122N4O19	15.0885	7.24038	0	21.7436	3.77394	0	847.534	159.908	0	0.969239	0.718657	0	0.0540025	0.0369351	0	0.108336	0.0200363	0	5.59499	1.31005	0	0.00760506	0.00585216	0	3	33
		C72H124N4O19	0	0	60.0009	0	0	0	0	0	0	0	0	0	0	0	0.764827	0	0	0	0	0	0	0	0	0	2	33
		C72H126N4O19	0	0	4.65078	0	0	0	0	0	0	0	0	0	0	0	0.0592832	0	0	0	0	0	0	0	0	0	1	33
		C75H130N4O19	0	0	0	0	5.0085	0	0	0	0	0	0	0	0	0	0	0	0.0265908	0	0	0	0	0	0	0	2	36
		C76H128N4O19	0	0	0	0	0	0.78831	0	0	0	0	0	0	0	0	0	0	0	0.00588811	0	0	0	0	0	0	4	37
		C77H132N4O19	0	0	0	0	0	0	11.0728	895.104	0	0	0	0	0	0	0	0	0	0	0.0730969	7.33315	0	0	0	0	3	38
		C77H138N4O19	0	0	0	0	0	0	0	0	4.6705	0	0	0	0	0	0	0	0	0	0	0	0.0374137	0	0	0	0	38
		C78H138N4O19	0	0	0	0	0	0	6.89989	4.4182	0	0	0	0	0	0	0	0	0	0	0.0455495	0.0361962	0	0	0	0	1	39
	GPL-s2	C77H134N4O24	0	0	0	0	0	0	2.99419	0	0	0	0	0	0	0	0	0	0	0	0.0197661	0	0	0	0	0	0	28
		C79H130N4O24	66.738	68.8918	0	0	0	0	54.2059	65.0465	0	6.71319	7.68696	0	0.238858	0.351435	0	0	0	0	0.35784	0.532894	0	0.0526746	0.0625964	0	4	30
		C79H138N4O24	0	0	0	0	3.36875	0	0	0	0	0	0	0	0	0	0	0	0.0178851	0	0	0	0	0	0	0	0	30
		C80H134N4O24	0	0	0	0	0	0	0	0	1.12303	0	0	0	0	0	0	0	0	0	0	0	0.00899618	0	0	0	3	31
		C80H140N4O24	0	0	0	0	0	0.285623	0	0	0	0	0	0	0	0	0	0	0	0.0021334	0	0	0	0	0	0	0	31
		C81H138N4O24	0	0	0	0	0	6.15916	0	0	0	0	0	0	0	0	0	0	0	0.0460045	0	0	0	0	0	0	2	32
		C82H136N4O24	0	0	0	0	0	0	26.9802	1.57371	0	0	0	0	0	0	0	0	0	0	0.178109	0.0128927	0	0	0	0	4	33
		C82H144N4O24	0	0	5.91002	0	0	0	0	0	0	0	0	0	0	0	0.0753347	0	0	0	0	0	0	0	0	0	0	33
		C84H142N4O24	21.1142	30.853	28.6032	0	0	0	3.20174	34.2692	57.6985	8.82915	9.48749	0	0.0755687	0.157389	0.364603	0	0	0	0.0211362	0.280751	0.462202	0.0692773	0.0772585	0	3	35
		C84H148N4O24	0	0	2.32694	0	0	0	0	0	0	0	0	674.961	0	0	0.0296613	0	0	0	0	0	0	0	0	0.0196579	0	35
		C86H144N4O24	0	0	0	0	9.91066	0	0	0	0	0	0	0	0	0	0	0	0.0526169	0	0	0	0	0	0	0	4	37
		C87H146N4O24	0	0	0	0	0	0	3.85979	3.7913	0	0	0	0	0	0	0	0	0	0	0.0254803	0.0310603	0	0	0	0	4	38
		C87H152N4O24	0	0	0	0	0	3.61407	0	0	0	0	0	0	0	0	0	0	0	0.0269945	0	0	0	0	0	0	1	38
		C87H154N4O24	0	0	0	0	0	2.69223	0	0	0	0	0	0	0	0	0	0	0	0.020109	0	0	0	0	0	0	0	38
		C88H148N4O24	0	0	0	0	0	0	0	0	2.8483	0	0	0	0	0	0	0	0	0	0	0	0.0228167	0	0	0	4	39
		C88H150N4O24	0	0	0.666819	0	0	0	0	0	0	0	0	0	0	0	0.0084999	0	0	0	0	0	0	0	0	0	3	39
		C88H154N4O24	0	0	0.051989	0	0	0	0	0	0	0	0	0	0	0	0.0006627	0	0	0	0	0	0	0	0	0	1	39
	GPL-s4,20	C81H138N4O27	0	0	0.64524	0	0	0	0	0	0	0	0	0	0	0	0.00822483	0	0	0	0	0	0	0	0	0	2	28
		C83H146N4O27	0	0	0	0	0	0	4.10691	5.64416	0	0	0	501.673	0	0	0	0	0	0	0.0271117	0.0462399	0	0	0	0.014611	0	30
		C85H142N4O27	4.12019	5.55937	0	0	0	0	3.20174	1.57371	0	0	0.580424	0	0.0147463	0.0283598	0	0	0	0	0.0211362	0.0128927	0	0	0.00472651	0	4	32
		C88H156N4O27	0	0	0.334917	0	0	0	0	0	0	0	0	0	0	0	0.00426916	0	0	0	0	0	0	0	0	0	0	35
		C90H154N4O27	8.20327	7.52837	12.162	0	0	0	10.5188	11.557	39.1054	0	0	0	0.0293599	0.0384042	0.155029	0	0	0	0.0694396	0.094681	0.31326	0	0	0	3	37
		C91H156N4O27	0	0	0.414046	0	0	0	0	0	0	0	0	0	0	0	0.00527782	0	0	0	0	0	0	0	0	0	3	38
		C92H158N4O27	0	0	0.406762	0	0	0	0	0	0	0	0	0	0	0	0.00518497	0	0	0	0	0	0	0	0	0	3	39
	GPL-s8	C77H128N4O26	0	0	0	0	0	0	0	0	0.490459	0	0	0	0	0	0	0	0	0	0	0	0.00392889	0	0	0	2	28
		C83H136N4O26	0	0	0	0	0	0	0	0	0.501221	0	0	0	0	0	0	0	0	0	0	0	0.0040151	0	0	0	4	34
		C83H138N4O26	7.50079	10.0204	0	0	0	0	7.35659	9.93203	0	1.25318	1.44726	0	0.0268457	0.0511168	0	0	0	0	0.0485645	0.0813683	0	0.00983299	0.0117853	0	3	34
		C86H144N4O26	0	0	0	0	0	0	19.8433	24.2575	0	0	0	0	0	0	0	0	0	0	0.130996	0.19873	0	0	0	0	3	37
		C88H150N4O26	17.8895	18.9653	17.9857	0	0	0	1.29022	1.34765	47.9002	0	2.0174	0	0.0640275	0.0967472	0.229262	0	0	0	0.00851734	0.0110407	0.383712	0	0.0164281	0	2	39
	GPL-s9	C97H166N4O34	0	0	0	0	0	15.6555	0	0	0.606424	0	0	0	0	0	0	0	0	0.116935	0	0	0.00485784	0	0	0	1	34
		C99H168N4O34	0	0	0	0	0	10.4402	0	0	0	0	0	0	0	0	0	0	0	0.077981	0	0	0	0	0	0	2	36
		C100H170N4O34	0	0	0	0	0	0.143313	0	0	0	0	0	0	0	0	0	0	0	0.00107044	0	0	0	0	0	0	2	37
	GPL-s12	C92H161N5O32	0	0	0	0	0	0	0	0	0	0	0	175.782	0	0	0	0	0	0	0	0	0	0	0	0.00511956	0	30
		C93H155N5O32	0	0	0.214692	0	0	0	0	0	0	0	0	191.776	0	0	0.00273666	0	0	0	0	0	0	0	0	0.00558537	4	31
		C99H173N5O32	0	0	0	0	0	0	0	0	0	0	0	152.051	0	0	0	0	0	0	0	0	0	0	0	0.0044284	1	37
	Ac2SGL	C53H100O17S	1.53594	0	0	0	0	0	0	0	0	0	0	0	0.00549719	0	0	0	0	0	0	0	0	0	0	0	0	41
		C58H110O17S	0	7.27571	0	4.79409	5.78382	0	6.39742	8.4177	0	13.8821	15.6344	0	0	0.0371153	0	0.0238863	0.030707	0	0.0422325	0.0689621	0	0.108925	0.127314	0	0	46
		C60H112O17S	0	0	0	0	0	0	0	0	0	0	0	4167.95	0	0	0	0	0	0	0	0	0	0	0	0.121389	1	48
		C60H114O17S	0	0	0	0	0	0	0	0	0	0	0	9626.93	0	0	0	0	0	0	0	0	0	0	0	0.28038	0	48
		C61H116O17S	0	0	0	0	0	0	0	0	1.50956	0	0	3660.17	0	0	0	0	0	0	0	0	0.0120925	0	0	0.106601	0	49
		C63H118O17S	0	0	0	0	0	0	0	0.932081	0	0	0	5787.47	0	0	0	0	0	0	0	0.00763609	0	0	0	0.168557	0	51
		C65H124O17S	0	0	19.3044	0	0	0	0	0	33.5276	0	0	0	0	0	0.246072	0	0	0	0	0	0.268578	0	0	0	0	53
		C67H128O17S	0	0	0	0	0	0	3.10261	0	0	0	0	0	0	0	0	0	0	0	0.0204818	0	0	0	0	0	0	55
		C69H132O17S	0	0	0	0	0	0	0	0	9.54214	0	1.44798	0	0	0	0	0	0	0	0	0	0.0764386	0	0.0117912	0	0	57
		C70H132O16S	0	0	0	0	0.461369	0	0	0	0	0	0	0	0	0	0	0	0.00244946	0	0	0	0	0	0	0	0	58
		C71H136O16S	0	0	0	0	0.546764	0	0	0	0	0	0	0	0	0	0	0	0.00290284	0	0	0	0	0	0	0	0	59
		C75H144O17S	0	0	0	0	0	0	0	0	0	0	0	50.818	0	0	0	0	0	0	0	0	0	0	0	0.00148005	0	63
	Ac3SGL	C78H148O19S	0	0	0	0	0	0	14.8078	0	0	0	0	0	0	0	0	0	0	0	0.0977538	0	0	0	0	0	0	66
		C80H150O19S	0	0	0.360438	0	0	0.148454	0.667753	12.8001	0	0	0	0	0	0	0.00459447	0	0	0.00110884	0.00440816	0.104865	0	0	0	0	1	68
		C80H152O18S	0	0	0	0	0	0	1.03872	0	0	0	0	479.348	0	0	0	0	0	0	0.00685709	0	0	0	0	0.0139608	0	68
		C80H152O19S	0	0	0	0	0	0	1.7271	0.582211	0	0	0	0	0	0	0	0	0	0	0.0114014	0.00476977	0	0	0	0	0	68
		C81H154O19S	0	0	0	0	0	0	0	0	0	0	0	360.776	0	0	0	0	0	0	0	0	0	0	0	0.0105074	0	69
		C82H156O19S	0	0	0	0	0	0	1.2254	13.7913	0	4.28322	4.0039	0	0	0	0	0	0	0	0.00808945	0.112986	0	0.0336079	0.0326045	0	0	70
		C84H158O19S	0	0	0	0	0	0	26.101	1.23573	0	6.26328	3.79751	0	0	0	0	0	0	0	0.172306	0.0101237	0	0.0491444	0.0309238	0	1	72
		C84H160O19S	0	0	0	0	0	0	0.589686	0	0	3.98455	0	0	0	0	0	0	0	0	0.00389281	0	0	0.0312645	0	0	0	72
		C85H160O19S	0	0	0	0	0	0	2.33767	5.98669	0	11.1996	3.02289	0	0	0	0	0	0	0	0.0154321	0.0490461	0	0.0878772	0.024616	0	1	73
		C85H162O19S	0	0	0	0	0	0	10.1006	11.5955	0	0	0	0	0	0	0	0	0	0	0.0666793	0.0949967	0	0	0	0	0	73
		C86H162O19S	0	0	0	0	0	0	0	0	0	17.6126	5.68467	0	0	0	0	0	0	0	0	0	0	0.138196	0.0462913	0	0	74
		C87H164O19S	0	0	0	0	0	0	0	0	0	3.68444	9.24268	0	0	0	0	0	0	0	0	0	0	0.0289097	0.075265	0	0	75
		C87H166O19S	0	0	5.24091	0	0	0.149423	0	0	0	0	0	0	0	0	0.0668055	0	0	0.00111609	0	0	0	0	0	0	0	75
		C88H166O19S	0	0	0	0	0	0	0	0	0	0	19.2423	0	0	0	0	0	0	0	0	0	0	0	0.156694	0	0	76
		C90H172O17S	0	0	0	0	0	0	0	0	0	0	0	21.1725	0	0	0	0	0	0	0	0	0	0	0	0.000616638	0	78
		C107H202O19S	0	0	0	0	0	0	0	0	0.201383	0	0	0	0	0	0	0	0	0	0	0	0.00161321	0	0	0	0	95
		C128H246O17S	0	0	0	0	0	0	0	0	0.113669	0	0	0	0	0	0	0	0	0	0	0	0.000910565	0	0	0	0	116
	Ac4SGL	C109H206O20S	0	0	0	0	0	0	0	0	0.195209	0	0	0	0	0	0	0	0	0	0	0	0.00156375	0	0	0	0	97
		C111H210O21S	0	0	0	0	0	0	0	0	0.182703	0	0	0	0	0	0	0	0	0	0	0	0.00146357	0	0	0	0	99
		C130H250O21S	0	0	0	0	0	0	0	0	0.0153137	0	0	0	0	0	0	0	0	0	0	0	0.000122673	0	0	0	0	118
		C146H276O19S	0	0	0	0	0	0	0	0	0.27776	0	0	0	0	0	0	0	0	0	0	0	0.00207467	0	0	0	0	134
	DAT	C36H62O13	0	0	9.86616	0	0	0	0	0	0	0	0	0	0	0	0.125763	0	0	0	0	0	0	0	0	0	2	24
		C36H64O13	0	0	0	0	0	0	172.502	83.0954	112.67	3744.2	3119.35	0	0	0	0	0	0	0	1.13877	0.680761	0.902562	29.3786	25.4015	0	1	24
		C36H66O13	0	0	0	0	18.3215	0	0	0	0.201186	0	0	0	0	0	0	0	0.0972711	0	0	0	0.00161163	0	0	0	0	24
		C37H64O13	0	0	0	0	0	0	0	0	2.32587	0	0	0	0	0	0	0	0	0	0	0	0.0186317	0	0	0	2	25
		C37H66O13	0	0	5.82316	0	0	0	50.2891	22.2932	0	0	0	470.95	0	0	0.0742274	0	0	0	0.331983	0.182638	0	0	0	0.0137162	1	25
		C37H68O13	2592.2	7.92418	90.3329	0	0	0	53.1811	41.2133	0	1.66381	0	0	9.27759	0.0404233	1.15147	0	0	0	0.351074	0.337641	0	0.013055	0	0	0	25
		C38H66O13	0	0	0	0	522.83	0	0	0	0.696461	0	0	0	0	0	0	0	2.77577	0	0	0	0.0055791	0	0	0	2	26
		C38H68O13	0	0	13.4015	0	0	0	0	0	0	0	0	836.674	0	0	0.170828	0	0	0	0	0	0	0	0	0.0243677	1	26
		C38H70O13	99.5158	857.569	583.497	561.956	0.621784	223.815	33.312	6.80153	660.29	5.17095	4.50675	76622.9	0.356171	4.37468	7.4378	2.79991	0.00330113	1.67174	0.219909	0.0557217	5.28935	0.0405735	0.0366994	2.23161	0	26
		C39H70O13	14.6614	11.1093	56.612	0	0	0	0	0	0	0	0	0	0.0524737	0.0566717	0.721629	0	0	0	0	0	0	0	0	0	1	27
		C39H72O13	9.94735	12.7377	50.3176	7.65688	19.6163	2199.48	6.76665	0	0	0	0	0	0.035602	0.0649783	0.641395	0.0381499	0.104145	16.4285	0.0446699	0	0	0	0	0	0	27
		C40H70O13	0	0	0	0	0	0	0	0	0	0.761226	0	0	0	0	0	0	0	0	0	0	0	0.0059729	0	0	2	28
		C40H74O13	0	0	0	18.6625	14.8393	0	0	0	0	0	0	0	0	0	0	0.0929849	0.0787836	0	0	0	0	0	0	0	0	28
		C41H76O13	11.5741	7.45701	0	0	0	0	0	0	0	0	0	0	0.0414244	0.0380401	0	0	0	0	0	0	0	0	0	0	0	29
		C42H74O13	0	0	0	0	0	0	72.9738	10.3877	46.9543	0	0	0	0	0	0	0	0	0	0.481736	0.0851014	0.376134	0	0	0	2	30
		C42H76O13	0	0	0	0.639864	9.10056	0	0	0	0	0	0	0	0	0	0	0.00318808	0.048316	0	0	0	0	0	0	0	1	30
		C42H78O13	0	0	0	0	0	0	21.7028	21.1159	0	0	0	0	0	0	0	0	0	0	0.143271	0.172992	0	0	0	0	0	30
		C43H76O13	4.80381	0	0	1.48602	0	0	0	0	0	0	0	0	0.0171931	0	0	0.00740403	0	0	0	0	0	0	0	0	2	31
		C43H80O13	0	0	0	0	0	0	0	0	0	6.97791	0	0	0	0	0	0	0	0	0	0	0	0.0547517	0	0	0	31
		C45H82O13	0	43.6608	0	0	0	0	0	0	0	0	0	0	0	0.222725	0	0	0	0	0	0	0	0	0	0	1	33
		C45H84O13	0	0	0	0	0	0	0	0	0	0	4.7356	0	0	0	0	0	0	0	0	0	0	0	0.0385629	0	0	33
		C46H82O13	0	0	0	9.06766	27.3185	198.497	0	0	0	0	0	1692.8	0	0	0	0.0451791	0.145037	1.48263	0	0	0	0	0	0.049302	2	34
		C47H86O13	26.3256	34.1335	0	0	0	0	0	0	0	0	0	0	0.0942206	0.174124	0	0	0	0	0	0	0	0	0	0	1	35
		C48H86O13	0	0	0	0	0	0	0	0	0	0	0	2222.77	0	0	0	0	0	0	0	0	0	0	0	0.0647373	2	36
		C48H88O13	0	27.0932	0	27.4665	1.4164	0	0	0	0	0	0	0	0	0.138209	0	0.13685	0.00751987	0	0	0	0	0	0	0	1	36
		C49H90O13	0	0	0	0	0	28.4838	0	0	9.45692	0	0	971.41	0	0	0	0	0	0.212753	0	0	0.075756	0	0	0.0282919	1	37
		C49H92O13	0	0	0	0	0	0	0	0.670072	0	0	0	0	0	0	0	0	0	0	0	0.00548957	0	0	0	0	0	37
		C50H90O13	13.1304	0	0	0	0	0	0	0	0	0	0	0	0.0469945	0	0	0	0	0	0	0	0	0	0	0	2	38
		C50H92O13	0	0	0	0	0	3.78557	0	0	0	0	0	0	0	0	0	0	0	0.0282755	0	0	0	0	0	0	1	38
		C51H92O13	0	0	1.56701	0	0	0	0	0	0	0	0	0	0	0	0.0199746	0	0	0	0	0	0	0	0	0	2	39
		C51H94O13	0	0	0	0	0	16.2701	0	0	0	0	0	0	0	0	0	0	0	0.121526	0	0	0	0	0	0	1	39
		C51H96O13	0	0	1.60727	0	0	0	0	0	0	3.66341	0	0	0	0	0.0204877	0	0	0	0	0	0	0.0287447	0	0	0	39
		C52H94O13	0	0	0	0	0	144.66	0	70.2261	0	0	0	0	0	0	0	0	0	1.08051	0	0.575329	0	0	0	0	2	40
		C52H96O13	0	0	2.60881	0	0	0	0	0	0	0	0	601.61	0	0	0.0332543	0	0	0	0	0	0	0	0	0.0175216	1	40
		C52H98O13	0	0	0	0	0	0	1.67237	0	0	0	0	0	0	0	0	0	0	0	0.0110401	0	0	0	0	0	0	40
		C52H98O14	0	0	0	2.56926	0	0	0	0	0	0	0	0	0	0	0	0.0128012	0	0	0	0	0	0	0	0	1	40
		C53H96O13	0	0	0	0	0	1.87184	0	0	0	0	0	0	0	0	0	0	0	0.0139813	0	0	0	0	0	0	2	41
		C54H100O13	0	0	0	0	0	0	0	0	0	0	0	1372.09	0	0	0	0	0	0	0	0	0	0	0	0.0399613	1	42
		C55H102O13	0	0	0	0	0	3.15279	0	0	2.6862	0	0	0	0	0	0	0	0	0.0235491	0	0	0.0215182	0	0	0	1	43
		C55H104O13	0	0	0	0	0	0	1.24315	6.39723	0	0	8.44893	0	0	0	0	0	0	0	0.00820663	0.0524094	0	0	0.0688013	0	0	43
		C56H106O14	0	0	0	0	0	0	0	1.80247	0	0	0	0	0	0	0	0	0	0	0	0.0147667	0	0	0	0	1	44
		C57H104O13	0	0	0	0	0	2.53056	0	0	0	0	0	0	0	0	0	0	0	0.0189015	0	0	0	0	0	0	2	45
		C57H106O13	0	0	0	22.0818	0	0	0	0	0	17.016	0	732.007	0	0	0	0.110021	0	0	0	0	0	0.133515	0	0.0213194	1	45
		C57H108O14	0	0	0	0	3.89019	1.13694	0	0	0	0	0	0	0	0	0	0	0.0206535	0.00849211	0	0	0	0	0	0	0	45
		C59H110O13	0	0	0	0	0	1.16929	0	0	0	0	0	0	0	0	0	0	0	0.00873374	0	0	0	0	0	0	1	47
		C59H112O13	0	0	0.149169	0	0	0	0	0	0.167722	0	0	0	0	0	0.00190145	0	0	0	0	0	0.00134356	0	0	0	0	47
		C60H110O13	0	0	0	0	0	0	0	0	0.449975	0	0	0	0	0	0	0	0	0	0	0	0.00360459	0	0	0	2	48
		C60H114O13	0	0	0	0	0	0	0	0	0	0	19.3177	0	0	0	0	0	0	0	0	0	0	0	0.157308	0	0	48
		C61H112O13	0	0	0	0	0	2.94926	0	0	0	0	0	0	0	0	0	0	0	0.0220289	0	0	0	0	0	0	2	49
		C62H114O13	0	0	0	22.5092	22.6329	0	9.6584	5.83498	0	0	0	0	0	0	0	0.112151	0.120161	0	0.0637598	0.0478031	0	0	0	0	2	50
		C63H120O13	0	0	0.140191	0	0	0.356496	0	0	0	0	0	0	0	0	0.00178701	0	0	0.00266277	0	0	0	0	0	0	0	51
		C65H120O13	0	0	0.293637	0	0	0	0	0	0	0	0	0	0	0	0.00374297	0	0	0	0	0	0	0	0	0	2	53
		C66H126O13	0	0	0	0	0	0	1.32689	0	0	0	0	0	0	0	0	0	0	0	0.00875943	0	0	0	0	0	0	54
		C69H132O13	0	0	0	0	0	0	0	0	0	0	0	451.87	0	0	0	0	0	0	0	0	0	0	0	0.0131605	0	57
		C82H158O13	0	0	0	0	0	0	0	0	0	0	0	379.562	0	0	0	0	0	0	0	0	0	0	0	0.0110545	0	70
	TAT	C48H84O14	0	0	0	49.6734	0	0	3.89872	0	0	0	7.4028	0	0	0	0	0.247495	0	0	0.0257374	0	0	0	0.0602824	0	2	36
		C48H86O14	0	0	0	0	0	123.261	0	0	0	0	0	0	0	0	0	0	0	0.920674	0	0	0	0	0	0	1	36
		C48H88O14	0	0	0	0	0	0	4.0886	0	0	0	0	0	0	0	0	0	0	0	0.0269908	0	0	0	0	0	0	36
		C49H84O14	0	0	0	6.39074	2.84316	0	0	0	0	0	0	0	0	0	0	0.0318415	0.0150947	0	0	0	0	0	0	0	3	37
		C49H86O14	0	0	3.83531	1.82419	0	0	0	0	0	0	0	2982.98	0	0	0.0488884	0.00908891	0	0	0	0	0	0	0	0.0868779	2	37
		C49H90O14	2.93149	1.56813	0	0	0	0	0.663041	3.84128	0	0	0	0	0.0104919	0.00799944	0	0	0	0	0.00437706	0.0314697	0	0	0	0	0	37
		C51H90O14	0	0	0	0	6.83983	0	0	0	0	0	0	0	0	0	0	0	0.0363135	0	0	0	0	0	0	0	2	39
		C52H92O14	0	0	0	0	0	4.3874	0	0	0	0	0	0	0	0	0	0	0	0.0327707	0	0	0	0	0	0	2	40
		C53H92O14	0	0	30.2042	0	0	1.48779	0	0	0	0	0	0	0	0	0.385011	0	0	0.0111127	0	0	0	0	0	0	3	41
		C53H94O14	0	0	0	0	0	0	0	0	0	3.37033	0	0	0	0	0	0	0	0	0	0	0	0.026445	0	0	2	41
		C54H94O14	0	0	0	0	0	10.7635	0	0	37.4192	0	0	0	0	0	0	0	0	0.0803955	0	0	0.299751	0	0	0	3	42
		C54H100O14	0	0	1.97431	0	0	0	0	0	0	0	0	640.098	0	0	0.0251664	0	0	0	0	0	0	0	0	0.0186425	0	42
		C55H98O14	0	0	0	0	0	0	0	0	0.413524	0	0	0	0	0	0	0	0	0	0	0	0.00331259	0	0	0	2	43
		C56H98O14	0	0	0	0	0	0	0	0	0	0	0	719.626	0	0	0	0	0	0	0	0	0	0	0	0.0209588	3	44
		C60H112O14	0	0	0	0	0	0	0	1.10187	0	0	0	0	0	0	0	0	0	0	0	0.00902705	0	0	0	0	0	48
		C61H112O14	0	0	0.587867	0	0	0.777778	0	0	0	0	0	0	0	0	0.0074935	0	0	0.00580944	0	0	0	0	0	0	1	49
		C61H114O14	0	11.4787	0	0	0	0	0	0	0	0	0	0	0	0.058556	0	0	0	0	0	0	0	0	0	0	0	49
		C63H112O14	2.17038	0	0.547496	0	0	0	0	0	0	0	0	0	0.00776788	0	0.0069789	0	0	0	0	0	0	0	0	0	3	51
		C63H114O14	0	0	0	0	0	0	2.62011	2.72236	0	0	0	0	0	0	0	0	0	0	0.0172966	0.022303	0	0	0	0	2	51
		C64H118O14	0.710841	0	0	0	0	0	0	0	0	0	0	0	0.00254413	0	0	0	0	0	0	0	0	0	0	0	1	52
		C65H116O14	0	0	0	0	0	0	0	0	4.45795	0	0	0	0	0	0	0	0	0	0	0	0.035711	0	0	0	3	53
		C65H120O14	23.4937	0	0	0	0	0	0	0	0	0	0	0	0.0840851	0	0	0	0	0	0	0	0	0	0	0	1	53
		C66H118O14	0	0	0	0	0	0	0	0	0.243914	0	0	0	0	0	0	0	0	0	0	0	0.00195391	0	0	0	3	54
		C66H120O14	0	0	0	0	0	0	0	0	0	0	0	777.158	0	0	0	0	0	0	0	0	0	0	0	0.0226344	2	54
		C66H122O14	9.638	0	0	0	0	0	0	0	0	0	0	519.979	0.0344948	0	0	0	0	0	0	0	0	0	0	0.0151441	1	54
		C67H122O14	0	0	0.179474	0	0	0	0	0	0	0	0	0	0	0	0.00228774	0	0	0	0	0	0	0	0	0	2	56
		C78H144O14	0	0	0	0	0	0	0	0	0	0	0	41.3569	0	0	0	0	0	0	0	0	0	0	0	0.0012045	2	66
		C96H182O14	0	0	0	0	0	0	0	0	0.14534	0	0	0	0	0	0	0	0	0	0	0	0.00116427	0	0	0	1	84
	PAT	C140H262O17	0	0	0	0	0	0	0	0	0	0	0	14.2377	0	0	0	0	0	0	0	0	0	0	0	0.000414666	3	128
GL	MAG	C15H30O4	19.6585	4578.4	0	0	6194.14	0	0	0	19.8025	18.7939	0	0	0.0703587	23.3556	0	0	32.8855	0	0	0	0.158631	0.147465	0	0	0	12
		C16H30O4	0	72.4429	0	0	0	0	0	0	0	0	0	0	0	0.36955	0	0	0	0	0	0	0	0	0	0	1	13
		C16H32O4	5365.7	0	0	6264.68	18.8548	0	0	0	24.2477	3.77968	3.20375	0	19.2041	0	0	31.2134	0.100102	0	0	0	0.19424	0.029657	0.0260888	0	0	13
		C17H34O4	2.11193	0	0	30.3374	33.742	0	19.1446	22.2114	0	57.4792	55.432	3050.88	0.00755867	0	0	0.151154	0.179141	0	0.126383	0.181967	0	0.451006	0.451394	0.0888553	0	14
		C18H34O4	235.842	207.304	0.720329	281.996	278.025	4.47335	0	0	0	24.751	23.3545	0	0.84409	1.05751	0.00918199	1.40503	1.47607	0.0334127	0	0	0	0.194207	0.19018	0	1	15
		C18H36O4	0	3.66357	0	0	5.03868	0	0	0	0	20.4237	20.1331	0	0	0.0186888	0	0	0.026751	0	0	0	0	0.160253	0.163948	0	0	15
		C19H36O4	0	0	0	28.461	31.8305	0	7.10524	10.8241	0	0	0	0	0	0	0	0.141806	0.168992	0	0.0469052	0.0886766	0	0	0	0	1	16
		C19H38O4	2.57005	35.671	0	8.40455	91.972	0	115.102	138.725	0	51.1705	47.4199	0	0.00919834	0.181967	0	0.0418752	0.488291	0	0.759846	1.13651	0	0.401505	0.386149	0	0	16
		C20H38O4	9.67873	9.54098	0	47.0225	35.2329	15.8556	0	15.3396	0	0	0	0	0.0346406	0.048671	0	0.234287	0.187056	0.11843	0	0.12567	0	0	0	0	1	17
		C20H40O4	0	3.51846	0	0	4.86232	0.159911	0	0	0	1.64514	1.72809	0	0	0.0179486	0	0	0.0258147	0.00119442	0	0	0	0.0129085	0.0140722	0	0	17
		C21H40O4	0	22.0309	3.95784	0	13.4326	0	3.14928	2.63432	0	2.86064	2.72312	0	0	0.112385	0.0504504	0	0.0713151	0	0.0207899	0.0215817	0	0.0224458	0.0221749	0	1	18
		C21H42O4	4.2395	2.36624	0	0	0	0	5.08388	6.76086	0	0	1.8105	0	0.0151734	0.0120708	0	0	0	0	0.0335612	0.0553884	0	0	0.0147432	0	0	18
		C22H42O4	4.94188	5.05524	19.3939	18.8324	9.20761	0.920911	32.5537	2.621	0	26.9999	24.403	0	0.0176872	0.0257881	0.247212	0.0938313	0.0488843	0.00687854	0.214903	0.0214726	0	0.211853	0.198719	0	1	19
		C24H48O4	4.97482	8.47553	8.25791	26.8797	24.9075	2.61521	4.79566	0	0	3.24416	2.95966	0	0.0178051	0.0432359	0.105263	0.133927	0.132237	0.0195337	0.0316585	0	0	0.0254551	0.0241011	0	0	21
		C25H48O4	0	0	0	0	6.26864	0	0	1.84203	0	0	0	0	0	0	0	0	0.033281	0	0	0.0150909	0	0	0	0	1	22
		C25H50O4	0	0	0	0	0	0	0	0	0	0	0	4863.18	0	0	0	0	0	0	0	0	0	0	0	0.141638	0	22
		C26H50O4	7.34351	1.29837	13.9618	2.11967	3.13209	62.4027	2.76427	36.8851	0	0	0	0	0.0262827	0.0066233	0.17797	0.0105611	0.0166287	0.466103	0.0182483	0.302181	0	0	0	0	1	23
		C29H58O4	0	0	0	0	0	0	0	1.48957	0	0	0	0	0	0	0	0	0	0	0	0.0122033	0	0	0	0	0	26
		C30H60O4	0	0	0	0	0	0	0	0	0	0	30.8562	0	0	0	0	0	0	0	0	0	0	0	0.251268	0	0	27
		C31H62O4	0	0	0	0	0	0	0	0	0	1.67785	17.878	0	0	0	0	0	0	0	0	0	0	0.0131651	0.145584	0	0	28
		C35H68O4	0	0	0	0	0	0	58.1127	0	0	0	0	0	0	0	0	0	0	0	0.38363	0	0	0	0	0	1	32
	DAG	C27H50O5	0	0	0	4.73224	12.068	2.39916	0	0	0	0	0	0	0	0	0	0.0235781	0.0640703	0.01792	0	0	0	0	0	0	1	24
		C27H52O5	0	0	0	0	0	0.798754	0	0	0	0	0	0	0	0	0	0	0	0.00596612	0	0	0	0	0	0	0	24
		C28H50O5	0	0	0	0	3.85184	0	0	0	0	0	0	0	0	0	0	0	0.0204499	0	0	1.98391	0	0	0	0	2	25
		C28H52O5	87.8471	97.3807	1.95934	22.8498	7.75996	6.0803	0	0	0	0	0	0	0.314409	0.496765	0.0249756	0.113848	0.0411986	0.0454154	0	0	0	0	0	0	1	25
		C28H54O5	0	0	0	0	0	28.7975	20.4418	4.57839	2.1883	0	0	23100.9	0	0	0	0	0	0.215097	0.134946	0.0375086	0.0175297	0	0	0.672804	0	25
		C29H54O5	96.2695	0	0	0	0	6.90046	0	0	0.773284	0	0	0	0.344553	0	0	0	0	0.0515415	0	0	0.0061945	0	0	0	1	26
		C30H56O5	95.1091	75.2494	1.42448	7.38512	75.6529	0	6.41363	6.90492	5.0602	0	7.22937	0	0.3404	0.383867	0.0181577	0.0367959	0.40165	0	0.0423395	0.0565686	0.0405354	0	0.0588702	0	1	27
		C31H56O5	0	0	0	0	0	2751.34	0	0	0	0	0	0	0	0	0	0	0	20.5505	0	0	0	0	0	0	2	28
		C32H60O5	0	0	0	6.80541	0	0	0	0	0	0	0	0	0	0	0	0.0339076	0	0	0	0	0	0	0	0	1	29
		C32H62O5	0	0	0	0	0	0	0	2.93775	0	0	0	0	0	0	0	0	0	0	1.93842	0.0240676	0	0	0	0	0	29
		C34H62O5	0	0	0	8.82833	10.1361	0	0	0	0	0	0	0	0	0	0	0.0439866	0.0538136	0	0	0	0	0	0	0	2	31
		C34H64O5	0	0	11.4937	0	0	0	0	0	0	0	0	0	0	0	0.14651	0	0	0	0	0	0	0	0	0	1	31
		C36H66O5	0	0	0	0	0	0	16.1018	17.4192	0	8.42084	0	0	0	0	0	0	0	0	0.106296	0.142707	0	0.0660735	0	0	2	33
		C39H74O5	0	0	0	0	0	0	7.79266	5.69302	0.0622906	3.69716	0	0	0	0	0	0	0	0	0.0514431	0.0466401	0.000498988	0.0290095	0	0	1	36
		C41H76O5	2.87036	5.08055	0	0	0	0	15.6112	14.0263	0	9.95095	4.39778	0	0.0102732	0.0259172	0	0	0	0	0.103057	0.114911	0	0.0780794	0.035812	0	2	38
		C42H80O5	0	0	0	0	0	0	0	0	0.214057	0	0	0	0	0	0	0	0	0	0	0	0.00171473	0	0	0	1	39
		C44H84O11	0	0	0	0	0	0	1.11408	0	0	28.637	1.29041	0	0	0	0	0	0	0	0.00735459	0	0	0.224698	0.010508	0	0	34
		C44H86O5	0	0	0.0425691	0	0	0	34.0202	0	0	0	0	0	0	0	0.000542625	0	0	0	0.224584	0	0	0	0	0	0	34
		C45H86O11	0	11.2949	0	0	0	0	0	0	0	0	25.2669	1444.05	0	0.0576184	0	0	0	0	0	0	0	0	0.205753	0.0420573	0	35
		C45H86O15	0	0	17.5384	0	0	0	8.79866	4.31863	0	0	0	0	0	0	0.223561	0	0	0	0.0580843	0.0353805	0	0	0	0	0	35
		C46H88O11	6.27585	1.39885	0.858848	61.3356	0.858492	0	43.3745	1.40129	4.61757	36.0515	1.39776	3737.75	0.0224615	0.00713588	0.0109477	0.305601	0.00455784	0	0.286337	0.0114801	0.0369897	0.282876	0.0113822	0.10886	0	36
		C46H90O15	151.036	0.592692	801.65	0	0	0	0	0	247.659	0	0	72685.6	0.540565	0.00302348	10.2186	0	0	0	0	0	1.98391	0	0	2.11693	0	36
		C48H92O11	0	0	0	0	0	0	0	0	1.4067	0	0	734.248	0	0	0	0	0	0	0	0	0.0112686	0	0	0.0213846	0	38
		C62H120O5	0	0	0.206144	0	0	0	0	0	0	0	0	150.451	0	0	0.0026277	0	0	0	0	0	0	0	0	0.00438181	1	59
		C62H122O5	0	0	0	0	0	0	0	5.60644	0	0	0	0	0	0	0	0	0	0	0	0.0459308	0	0	0	0	0	59
		C63H122O5	0	0	0	0	0	0	0	2.02045	0	0	0	0	0	0	0	0	0	0	0	0.0165525	0	0	0	0	1	60
		C64H124O5	0	0	0	0	0	0	0	4.28333	0	0	0	0	0	0	0	0	0	0	0	0.0350912	0	0	0	0	1	61
		C65H124O5	0	0	0	0	0	0	0	0	0	0	1.4004	0	0	0	0	0	0	0	0	0	0	0	0.0114038	0	2	62
		C80H148O6	0	0	0	0	0	0	0	0	0.110419	0	0	0	0	0	0	0	0	0	0	0	0.000884527	0	0	0	2	77
		C87H162O6	0	0	0	0	0	0	0	0	0	0	0	76.8094	0	0	0	0	0	0	0	0	0	0	0	0.00223704	2	83
		C95H178O6	0	0	0	0	0	0	0	0	0	0	0.65227	0	0	0	0	0	0	0	0	0	0	0	0.00531157	0	2	92
	TAG	C39H68O6	76.922	0	0	16.0137	0	0	0	2.80262	2.61494	202.277	2.49499	0	0.275307	0	0	0.0797874	0	0	0	0.0229605	0.0209474	1.58715	0.0203172	0	3	36
		C39H70O6	0	0	0	0	0	0	0	4.94845	0	4.15288	0	0	0	0	0	0	0	0	0	0.0405402	0	0.0325853	0	0	2	36
		C40H74O6	0	0	0	0	0	0	0	0	0	43.8595	11.6177	0	0	0	0	0	0	0	0	0	0	0.344141	0.0946051	0	1	37
		C41H72O6	1.24812	0	0	0	0	0	0	0	0	0	0	0	0.00446708	0	0	0	0	0	0	0	0	0	0	0	3	38
		C41H78O6	1.23583	0	0	0	0	0	0	0	0	0	0	0	0.00442308	0	0	0	0	0	0.0505402	0	0	0	0	0	0	38
		C42H74O6	0	0	0	0	0	0	0	0	1.28561	0	0	0	0	0	0	0	0	0	0	0	0.0102986	0	0	0	3	39
		C43H76O6	0	4.54041	0	0	123.491	0	0	0	0	13.0173	0	0	0	0.0231618	0	0	0.655631	0	0	0	0	0.10214	0	0	3	40
		C43H82O6	15.4633	0	0	0	0	0	0	0	0	0	0	0	0.0553438	0	0	0	0	0	0.0305402	0	0	0	0	0	0	40
		C44H78O6	0	0	3.65929	0	0	0	0	0	0	0	0	0	0	0	0.0466447	0	0	0	0	0	0	0	0	0	3	41
		C44H84O6	0	0	0	0	0	0	0	0	0.230433	0	0	0	0	0	0	0	0	0	0.0205402	0	0.00184592	0	0	0	0	41
		C45H80O6	0	2.4287	0	0	0	0	0	0	0	0	0	0	0	0.0123894	0	0	0	0	0	0	0	0	0	0	3	42
		C46H86O6	0	0	0	0	0	0	0	0	0	0	0	70.6108	0	0	0	0	0	0	0	0	0	0	0	0.0020565	1	43
		C47H84O6	0	0	0	0	1.47893	0.268801	0	5.31506	0	0	0	0	0	0	0	0	0.00785181	0.00200775	0	0.0435437	0	0	0	0	3	44
		C49H88O6	0	0	0	0	0	2.0479	0	0	0	0	0	47.1145	0	0	0	0	0	0.0152963	0	0	0	0	0	0.0228018	3	46
		C51H94O6	0	0	0.0599373	0	0	0	0	0	0	0	0	0	0	0	0.000764017	0	0	0	0	0	0	0	0	0	2	48
		C53H96O6	0	0	0	1.86258	0	0	0	0	0	3.63744	0	0	0	0	0	0.00928019	0	0	0	0	0	0.0285409	0	0	3	50
		C54H98O6	0	0	0	0	0.653335	0	0	0	0	0	0	0	0	0	0	0	0.00346864	0	0	0	0	0	0	0	3	51
		C55H100O6	1.61707	0	0	0	1.7137	0	0	1.37673	0	0	0	0	0.00578757	0	0	0	0.00909825	0	0	0.0112788	0	0	0	0	3	52
		C55H106O6	0	11.46	0	0	0	0	0	0	0	0	0	0	0	0.0584605	0	0	0	0	0	0	0	0	0	0	0	52
		C56H108O6	0	0	0	0	0	0	0	0	0.639408	0	0	0	0	0	0	0	0	0	0	0	0.00512207	0	0	0	0	53
		C66H128O6	0	0	0.0605239	0	0	0	0	0	0	0	0	0	0	0	0.000771494	0	0	0	0	0	0	0	0	0	0	63
		C68H130O6	0	0	0	0	2.52956	0	0	0	0	0	0	0	0	0	0	0	0.0134297	0	0	0	0	0	0	0	1	65
		C84H162O6	0	0	0	0	0	0	0	0	0	0	0	870.941	0	0	0	0	0	0	0	0	0	0	0	0.00137219	1	81
		C97H190O6	0	0	0	0	0	0.159715	0	0	0	0	0	0	0	0	0	0	0	0.00119296	0	0	0	0	0	0	0	94
		C102H196O6	0	0	0	0	0	0	0	0	0	0	0	782.908	0	0	0	0	0	0	0	0	0	0	0	0.0253657	2	99
FAc	FA	C12H22O2	153.207	104.217	5.82221	36.4231	726.329	6.16109	33.9645	0	0	0	0	212.163	0.548333	0.531638	0.0742154	0.181476	3.85617	0.0460189	0.224216	0	0	0	0	0.00617915	1	12
		C12H24O2	0	0	3.3515	0	1321.3	5.63306	0	0	7.38344	0	0	0	0	0	0.0427213	0	7.01495	0.0420749	0	0	0.0591461	0	0	0	0	12
		C14H26O2	43.8527	68.2312	2.98048	21.7417	247.174	0	21.3874	0	23.5212	35.8823	15.4991	0	0.156951	0.348065	0.037992	0.108327	1.31228	0	0.141189	0	0.18842	0.281548	0.126212	0	1	14
		C14H28O2	140.682	21.1595	9.32407	0	0	7.07787	158.958	37.4048	0.460496	125.42	125.569	509.588	0.503508	0.10794	0.118853	0	0	0.0528666	1.04936	0.306439	0.00368887	0.984102	1.02254	0.0148415	0	14
		C15H28O2	42.3006	43.6269	0	280.383	283.045	8.76555	59.4927	34.0415	0	54.1469	34.6322	1015.12	0.151396	0.222552	0	1.39699	1.50272	0.0654724	0.39274	0.278886	0	0.424859	0.282017	0.0295649	1	15
		C15H30O2	0	35.251	0	0	0	0	0	0	0	0	0	0	0	0.179825	0	0	0	0	0	0	0	0	0	0	0	15
		C16H30O2	55.8212	99.9113	0	916.544	65.6195	0	4.32808	36.5222	0	180.341	166.065	3674.57	0.199787	0.509674	0	4.56663	0.348382	0	0.0285718	0.299209	0	1.41503	1.3523	0.10702	1	16
		C16H32O2	50.9665	213.806	86.8689	0	9.01766	6.83581	9.96274	10.7325	2.22994	14.8729	3.88358	0	0.182411	1.09068	1.10731	0	0.0478759	0.0510586	0.0657689	0.0879266	0.0178632	0.116699	0.0316247	0	0	16
		C17H32O2	28.2936	11.4729	0	1402.34	18.8253	200.998	34.4659	162.79	0	39.8353	39.4094	9496.7	0.101264	0.058526	0	6.98708	0.0999459	1.50131	0.227526	1.33366	0	0.312565	0.320919	0.276587	1	17
		C18H34O2	23.949	16.9823	0	297.556	9.52707	32.4126	207.454	21.7361	0	4.75739	7.1111	0	0.0857146	0.0866312	0	1.48255	0.0505804	0.242099	1.3695	0.178073	0	0.0373285	0.0579071	0	1	18
		C18H36O2	0	0	0	0	7.89405	0	0	0	0	0	0	0	0	0	0	0	0.0419105	0	0	0	0	0	0	0	0	18
		C19H38O2	0	0	0	8.6902	13.9108	0	0	0	0	0	0	0	0	0	0	0.0432984	0.0738544	0	0	0	0	0	0	0	0	19
		C20H38O2	36.9695	173.219	0	16.1959	54.8183	149.842	4.64814	4.64708	0	117.096	117.698	0	0.132315	0.883635	0	0.080695	0.291037	1.11921	0.0306847	0.0380713	0	0.918782	0.958438	0	1	20
		C25H50O3	0	0	0	0	0	0	0	0	0	2.67366	0	0	0	0	0	0	0	0	0	0	0	0.0209787	0	0	0	25
		C26H50O2	0	0	0	0	7.75875	0.962799	0	0	0	0	0	0	0	0	0	0	0.0411922	0.00719142	0	0	0	0	0	0	1	26
		C28H54O2	0	0	0	0	4.1133	0	0	0	0	0	0	0	0	0.0120557	0	0	0.021838	0	0	0	0	0	0	0	1	28
		C28H56O3	0	0	0	0	5.46424	0	0	0	0	0	0	0	0	0	0	0	0.0290103	0	0	0	0	0	0	0	0	28
		C29H56O2	5480.04	0	0.945772	5.58436	2.20527	0.114948	0	0	5.23735	0	0	581.038	19.6133	0	0.0120557	0.0278237	0.011708	0.000858581	0	0	0.0419545	0	0	0.0169225	1	29
		C30H58O2	0	0	0	0	0	0.660526	0	0	0	0	0	0	0	0	0	0	0	0.00493365	0	0	0	0	0	0	1	30
		C30H60O3	0	0	0	0	23.6791	0	0	0	0.347841	0	0	0	0	0	0	0	0.125715	0	0	0	0.00278643	0	0	0	0	30
		C32H62O2	161.589	5.26968	0	0	0	0	4.33296	0	0	0	0	0	0.578333	0.026882	0	0	0	0	0.028604	0	0	0	0	0	1	32
		C33H64O2	0	0	0	17.5283	13.1339	0	0	0	0	0	0	0	0	0	0	0.0873336	0.0697296	0	0	0	0	0	0	0	1	33
		C42H84O3	0	0	0	0	0	0	0	0	0	0	0	1422.9	0	0	0	0	0	0	0	0	0	0	0	0.0414414	0	42
		C44H68O8	0	5.63709	0	0	0	0	0	0	0	0	0	0	0	0.0287563	0	0	0	0	0	0	0	0	0	0	7	19
		C49H98O3	0	4.95001	0	0	0	0	0	0	0	0	0	0	0	0.0252513	0	0	0	0	0	0	0	0	0	0	0	49
	MA	C76H148O3	0	0	1.80085	0	0	2.15172	0	0	0	0	0	4938.12	0	0	0.0229554	0	0	0	0.0160718	0	0	0	0	0.14382	1	76
		C77H154O4	0	0	0	0	0	0	0	0	0.205653	0	0	0	0	0	0	0	0	0	0	0	0.00164741	0	0	0	0	77
		C84H164O3	0	0	0	0	0	0	0	0	0	0	0	58.6205	0	0	0	0	0	0	0	0	0	0	0	0.00170729	1	84
		C91H178O3	0	0	0	0	0	0.944958	0	0	0.150045	0	0	269.065	0	0	0	0	0	0	0.00705816	0	0.00120196	0	0	0.0078364	1	91
		C93H182O4	0	0	0	0	0	0.887306	0	0	0	0	0	152.462	0	0	0	0	0	0	0.00662754	0	0	0	0	0.0044404	1	93
	GMM	C65H124O10	0	0	0	0	0	0	0	0	0	0	0.6964	0	0	0	0	0	0	0	0	0	0	0	0.00567092	0	3	59
		C69H132O10	0	0	0	0	0.699684	0	0	0	0	0	0	0	0	0	0	0	0.00356927	0	0	0	0	0	0	0	1	63
		C72H140O7	0	0	0	0	0	0	0	0	0	0	1.29168	0	0	0	0	0	0	0	0	0	0	0	0.0105184	0	0	69
		C72H140O8	0	0	0	0	0	0	3.74022	4.04523	0	14.1418	13.2698	0	0	0	0	0	0	0	0.024691	0.0331406	0	0.110963	0.108059	0	1	66
		C79H154O5	0	0	0	0	0	0	0.324935	0	0	0	0	0	0	0	0	0	0	0	0.00214505	0	0	0	0	0	1	76
		C83H164O9	0	0	0.0226405	0	0	0	0	0	0	0	0	0	0	0	0.000288597	0	0	0	0	0	0	0	0	0	0	77
		C86H168O9	0	0	0	0	0	1.48085	0	0	6.92159	0	0	963.523	0	0	0	0	0	0.0110609	0	0	0.0554463	0	0	0.0280621	1	80
		C88H172O9	0	0	0	0	0	0.0717831	0	0	0	0	0	0	0	0	0	0	0	0.000536168	0	0	0	0	0	0	1	82
		C91H176O8	0	0	0	0	0	0	0.398537	0	0	0	0	0	0	0	0	0	0	0	0.00263094	0	0	0	0	0	2	85
		C91H180O6	0	0	0	0	0	1.58554	0	0	0	0	0	1114.1	0	0	0	0	0	0.0118428	0	0	0	0	0	0.0324476	1	88
		C93H180O9	0	0	0	0	0	0	0.416997	0	0	0	0	0	0	0	0	0	0	0	0.0027528	0	0	0	0	0	1	87
		C93H182O9	0	0	0	0.713591	0	0	0	0	0	0	0	0	0	0	0	0.00355542	0	0	0	0	0	0	0	0	0	87
	TMM	C68H128O15	0	0	0	0	0	0.285893	0	0	0	0	0	230.707	0	0	0	0	0	0.00213542	0	0	0	0	0	0.00671923	1	56
	TDM	C163H318O7	0	0	0.0814892	0	0	0	0	0	0	0	0	0	0	0	0.00103874	0	0	0	0	0	0	0	0	0	0	163
		C181H350O16	0	0	0.121913	0	0	0.285262	0	0	0	0	0	0	0	0	0.00155402	0	0	0.0021307	0	0	0	0	0	0	0	169
		C182H352O16	0	0	0.143771	0	0	0	0	0	1.45379	0	0	0	0	0	0.00183264	0	0	0	0	0	0.0116458	0	0	0	0	170
	DIM	C90H176O5	0	0	0.335809	0	0	0	0	0	0	0	0	0	0	0	0.00428054	0	0	0	0	0	0	0	0	0	1	57
		C93H184O5	0	0	0	0	0	0	0	0	0.177637	0	0	0	0	0	0	0	0	0	0	0	0.00142299	0	0	0	0	60
		C95H186O5	0	0	0	0	0	0.481418	0	0	0	0	0	108.711	0	0	0	0	0	0.00359585	0.00254644	0.0010893	0	0	0	0.00316616	0	62
		C96H188O5	0	0	0	0	0	0	0	0	0.135981	0	0	0	0	0	0	0	0	0	0.0247604	0.00337984	0.0010893	0	0	0	0	63
		C103H204O5	0	0	0	0	0	0	0	0	0.421918	0	0	88.1148	0	0	0	0	0	0	0	0.00254644	0.00337984	0	0	0.0025663	0	70
		C106H208O6	0	0	0	0	0	0	0	0	0.317882	0	0	0	0	0	0	0	0	0	0.0010893	0.0247604	0.00254644	0	0	0	0	74
		C107H210O6	0	0	0	0	0	0	0	0	3.09093	0	0	946.659	0	0	0	0	0	0	0.00337984	0	0.0247604	0	0	0.027571	0	75
		C108H212O6	0	0	0	0	0	0	0	0	0	0	0	103.448	0	0	0	0	0	0	0	0	0	0	0	0.00301286	0	76
	gDIM	C57H103O10	0	0	0	0	9.48746	0	0	0	0	28.5698	0	0	0	0	0	0	0.0503701	0	0	0	0	0.224171	0	0	0	32
		C59H107O10	0	0	0	0	3.03569	0	0	0	0	0	0	0	0	0	0	0	0.0161168	0	0	0	0	0	0	0	0	34
		C69H127O10	0	0	0	0	0	3.01165	4.07031	0	0.545463	8.57982	7.42497	0	0	0	0	0	0	0.0224949	0.0268701	0	0.0043695	0.0673209	0.060463	0	0	44
		C73H135O10	0	0	0	0	0	0	3.65998	3.43639	0	0	14.9807	0	0	0	0	0	0	0	0.0241613	0.0281527	0	0	0.121991	0	0	48
		C77H144O10	0	0	0	0	0	0	6.77527	0	0	0	1.25339	0	0	0	0	0	0	0	0.0447268	0	0	0	0.0102066	0	0	52
		C78H146O10	0	0	0	0	0	0	0	0	0	0	0	0	0	0	0	0	0	0	0	0	0	0	0	0	0	53
		C117H220O10	0	0	0	0	0	0	0	0	1.36645	0	0	289.193	0	0	0	0	0	0	0	0	0.0109461	0	0	0.00842259	0	110
Polyketides	Mycobactin	C33H47N5O10	0	0	0.708534	0	0	0	0	0	0	0	0	0	0	0	0.00903163	0	0	0	0	0	0	0	0	0	0	6
		C33H47N5O12	0	0	0	0	0	0	0	0	1.58344	0	0	0	0	0	0	0	0	0	0	0	0.0126844	0	0	0	0	6
		C34H49N5O10	0	0	0	0	0	0	0	0	0.203025	0	0	0	0	0	0	0	0	0	0	0	0.00162636	0	0	0	0	7
		C34H49N5O11	0	0	0	0	0	0	0	0	0.702554	0	0	0	0	0	0	0	0	0	0	0	0.00562791	0	0	0	0	7
		C35H49N5O10	0	0	0	0	0	0	0	0	0.316919	0	0	0	0	0	0	0	0	0	0	0	0.00253872	0	0	0	1	8
		C36H51N5O10	0	0	0	0	0	0	1.65651	2.03331	0	0	5.46238	0	0	0	0	0	0	0	0.0109355	0.0166579	0	0	0.0444813	0	1	9
		C36H53N5O10	0	0	0	0	0	0	0	0	0.401165	0	0	680.432	0	0	0	0	0	0	0	0	0.00321359	0	0	0.0198173	0	9
		C36H53N5O12	0	0	0	3.93843	2.31556	0	0	0	0	0	0	0	0	0	0	0.019623	0.0122936	0	0	0	0	0	0	0	0	9
		C37H53N5O10	0	0	0	0	2.45968	0	0	0	0	0	0	0	0	0	0	0	0.0130588	0	0	0	0	0	0	0	1	10
		C37H55N5O12	0	0	0	0	0	0	1.04558	0	0	0	0	1187.88	0	0	0	0	0	0	0.0069024	0	0	0	0	0.0345964	0	10
		C38H55N5O10	0	0	0	0	0	0	150.018	144.072	0	321.32	8.56	0	0	0	0	0	0	0	0.990342	1.18031	0	2.52121	0.0697057	0	1	11
		C38H55N5O12	0	0	0	0	0	0.10908	0	0	0	0	0	0	0	0	0	0	0	0.000814751	0	0	0	0	0	0	1	11
		C38H57N5O11	0	0	0.247667	0	0	0	0	0	0	0	0	0	0	0	0.00315699	0	0	0	0	0	0	0	0	0	0	11
		C39H57N5O10	0	0	0	0	0	0	0	0	0	0	261.827	0	0	0	0	0	0	0	0	0	0	0	2.13211	0	1	12
		C39H57N5O11	0	0	0	0	0	0	0	0	0.520536	0	0	0	0	0	0	0	0	0	0	0	0.00416983	0	0	0	1	12
		C43H67N5O8	0	0	0	0	0	2.8903	0	0	0	0	0	714.079	0	0	0	0	0	0.0215885	0	0	0	0	0	0.0207972	1	16
		C43H67N5O9	11.5456	188.31	0	0	0	1.33263	0	0	0	0	0	0	0.0413224	0.96062	0	0	0	0.00995376	0	0	0	0	0	0	1	16
		C43H69N5O10	0	0	0	0	0	0	0	3.15029	0	0	0	0	0	0	0	0	0	0	0	0.0258088	0	0	0	0	0	16
		C44H66FeN5O10	0	0	0	10.5963	10.191	2.93972	0	0	0	0	0	0	0	0	0	0.0527954	0.0541054	0.0219576	0	0	0	0	0	0	1	17
		C44H69N5O8	0	0	0	0	0	0	0	0	0	0	0	841.225	0	0	0	0	0	0	0	0	0	0	0	0.0245003	1	17
		C44H69N5O9	24.0995	0	2.9881	16.824	0	0	135.455	3.21485	0	13.0002	12.3442	0	0.086253	0	0.0380891	0.0838244	0	0	0.894204	0.0263377	0	0.102005	0.100522	0	1	17
		C44H69N5O10	0	0	2.02938	1.94569	0	0	0	24.3226	0	4.33626	3.23748	0	0	0	0.0258683	0.00969427	0	0	0	0.199263	0	0.0340241	0.0263634	0	1	17
		C44H71N5O10	0	0	9.48982	9.31761	11.673	6.16164	0	0	0	0	0	0	0	0.0258683	0.120966	0.0464245	0.0619733	0.046023	0	0	0	0	0	0	0	17
		C45H71N5O10	3.68465	0	0	0	0	0.584167	0	0	0	0	0	0	0.0131875	0.120966	0	0	0	0.00436331	0	0	0	0	0	0	1	18
		C45H71N5O8	0	0	0	1.56803	1.7497	4.45078	0	0	0	0	0	0	0	0	0	0.0078126	0.00928935	0.0332441	0	0	0	0	0	0	1	18
		C45H73N5O8	0	0	0	0	0	0	0	0	0	0	0	562.662	0	0	0	0	0	0	0	0	0	0	0	0.0163873	0	18
		C45H73N5O9	0	0	1.95615	0	0	0	0	0	0	0	0	0	0	0	0.0249349	0	0	0	0	0	0	0	0	0	0	18
		C46H70FeN5O10	0	0	0	0	0	0.507289	0	0	0	0	0	0	0	0	0	0	0	0.00378908	0	0	0	0	0	0	1	19
		C46H73N5O8	0	0	0	1.96766	38.8065	0	18.2142	9.92076	0	0	0	110198	0	0	0	0.00980373	0.206028	0	0.120241	0.081276	0	0	0	3.20948	1	19
		C46H73N5O10	10.3294	14.5413	1.13462	0	0	7.89738	0	0	0.815791	2.84979	2.87504	0	0.0369695	0.0741789	0.0144629	0	0	0.0589878	0	0	0.00653501	0.0223607	0.023412	0	1	19
		C46H73N5O8	36.5583	318.536	0	0	0	0	0	0	2.91025	38.0852	31.6753	0	0.130844	1.62493	0	0	0	0	0	0	0.023313	0.298833	0.257938	0	1	19
		C46H73N5O9	0	0	0	0	0	2.02515	0	0	0	0	0	0	0	0	0	0	0	0.0151264	0	0	0	0	0	0	1	19
		C47H75N5O10	0	0	2.39663	0	0	0	0	0	0	0	0	0	0	0	0.0305497	0	0	0	0	0	0	0	0	0	1	20
		C47H75N5O9	0	0	0	2.09229	2.2577	3.17018	0	0	0	0	0	265.634	0	0	0	0.0104247	0.0119864	0.023679	0	0	0	0	0	0.00773647	1	20
		C47H75N5O8	287.13	2.24658	0	0	0	0	0	0	0	0	0	0	1.02765	0.0114604	0	0	0	0	0	0	0	0	0	0	1	20
		C47H77N5O9	0	0	0	0	0	0	0	0	0	0	0	2090.29	0	0	0	0	0	0	0	0	0	0	0	0.0608787	0	20
		C48H77N5O10	0	0	0	0	0	1.57318	0	11.2262	0	3.34217	1.58251	0	0	0	0	0	0	0.0117505	0	0.0919706	0	0.0262241	0.0128867	0	1	21
		C48H77N5O9	207.651	31.0215	764.589	0	0	0	6.93449	6.73697	381.725	6.88323	6.38474	1017.54	0.743193	0.158249	9.74617	0	0	0	0.0457779	0.0551927	3.05786	0.0540088	0.0519922	0.0296353	1	21
		C48H77N5O8	0	20.6121	7.74819	0	0	0	0	0	0	0	0	0	0	0.105148	0.0987656	0	0	0	0	0	0	0	0	0	1	21
		C48H79N5O8	0	0	0	43.4956	0	0	0	0	0	0	0	0	0	0	0	0.216714	0	0	0	0	0	0	0	0	0	21
		C49H77N5O7	0	0	0	0	0	0.364236	0	0	0	0	0	0	0	0	0	0	0	0.00272058	0	0	0	0	0	0	0	22
		C49H79N5O8	0	0	36.8581	0	0	0	254.366	213.723	0	0	0	3857.03	0	0	0.469828	0	0	0	1.67919	1.75093	0	0	0	0.112334	1	22
		C49H79N5O9	9.5617	10.3701	0	5.4966	0	0	0	0	0	0	0	0	0.0342217	0.0529008	0	0.0273865	0	0	0	0	0	0	0	0	1	22
		C49H79N5O10	0	0	0	0	0	1.98493	0	0	0	0	0	0	0	0	0	0	0	0.014826	0	0	0	0	0	0	1	22
		C49H81N5O8	0	0	0	0	0	7.9857	0	0	0	0	0	0	0	0	0	0	0	0.0596474	0	0	0	0	0	0	0	22
		C49H81N5O10	0	0	2.14662	0	0	0	0	0	0	0	0	0	0	0	0.0273629	0	0	0	0	0	0	0	0	0	0	22
		C50H79N5O7	0	6.32494	0	0	0	0	0	0	1.19965	0	0	0	0	0.0322652	0	0	0	0	0	0	0.00960993	0	0	0	0	23
		C52H83N5O7	0	0	0	5.42318	4.87044	0	0	0	0	0	0	0	0	0	0	0.0270207	0.0258578	0	0	0	0	0	0	0	0	23
	Linear PK	C28H59O4P	0	0	0	0	0	0	0	0	0.174928	0	0	0	0	0	0	0	0	0	0	0	0.00140128	0	0	0	0	28
		C36H75O4P	0	0	0	0	0	0	10.2698	12.223	4.85302	0	0	0	0	0	0	0	0	0	0.0677959	0.100137	0.0388758	0	0	0	0	36
		C37H75O9P	4.57959	0	0	0	0	0	0	0	0	0	0	0	0.0163906	0	0	0	0	0	0	0	0	0.373577	0	0	0	31
		C38H77O9P	0	0	0	0	0	0	0	0	6.00942	0	0	0	0	0	0	0	0	0	0	0	0.0481393	0	0.117779	0	0	32
		C39H81O4P	0.719887	0	0	0	0	0	0	0	0	0	0	0	0.00257651	0	0	0	0	0	0	0	0	0	0	0	0	39
		C55H91O8P	0	0	0	8.54693	0	0	0	0	0	0	0	0	0	0	0	0.0425846	0	0	0	0	0	0	0	0	10	50
	exochelins	C34H51N5O11	0	0	0	0	0	0	0	0.706389	0	0	0	0	0	0	0	0	0	0	0	0.00578711	0	0	0	0	0	7
		C34H53N5O11	1.93748	7.29881	0	0	0	0	0	0	0	0	0	0	0.00693432	0.0372331	0	0	0	0	0	0	0	0	0	0	0	7
		C35H53N5O11	0	0	0	0	0	0	0	0	0.532681	0	0	0	0	0	0	0	0	0	0	0	0.00426711	0.08005	0	0	0	5
		C36H55N5O11	0	0	0.759146	4.42378	0	0	0	0	0	0	13.8712	0	0	0	0.00967678	0.0220412	0.0271377	0	0	0	0	0	0.112956	0	0	6
		C39H61N5O11	0	3.94109	0	0	0	0	0	0	0	0	0	0	0	0.0201045	0	0	0	0	0	0	0	0	0	0	0	9
Prenols	ubiquinones	C31H40O2	23.8763	61.8728	0	35.0009	37.5214	0	0	0	0	0	0	0	0.0854545	0.315629	0	0.17439	0.199206	0	0	0	0	0	0	0	4	20
		C31H42O2	16.3187	47.6231	0	0	0	0	0	0	0	0	0	0	0.0584055	0.242938	0	0	0	0	0	0	0	0	0	0	3	20
		C36H48O2	29.4201	27.6741	0	0	0	0	0	0	0	0	0	0	0.105296	0.141173	0	0	0	0	0	0	0	0	0	0	5	25
		C40H56O2	0	0	0	0	5.7191	0	0	0	0	0	0	0	0	0	0	0	0.0303634	0	0	0	0	0	0	0	9	0
		C41H58O2	13.383	0	0	0	0	0	0	0	0	0	0	0	0.0478983	0	0	0	0	0.0361955	0	0	0	0	0	0	5	30
		C46H64O2	0	0	0	0	0	0	0	0	0	0	3.81525	0	0	0	0	0	0	0	0	0	0	0	0.0310683	0	7	35
		C46H66O2	0	0	0	7.45014	6.57955	0	0	0	0	0	0	0	0	0	0	0.0371199	0.0349316	0	0	0	0	0	0	0.0570463	6	35
		C51H72O2	0	0	0	6.69741	0	0	0	0	0	0	0	0	0.338499	0	0	0.0333694	0	0	0	0	0	0	0	0	8	40
		C51H74O2	0	7.93601	0	10.7287	0	0	0	0	0	0	0	0	0	0.0404836	0	0.0534553	0	0	0	0	0	0	0	0	7	40
		C56H80O2	0	0	0	0	11.4124	0	0	0	0	0	0	0	0	0	0	0	0.0605897	0	0	0	0	0	0	0	9	45
		C56H82O6S	13.0956	16.6121	8.57305	0	0	0	0	0	0	0	0	0	0.0468698	0.0847426	0.10928	0	0	0	0	0	0	0	0	0	8	45
		C71H106O2	0	0	0	0	0	0	0	0	0	0	0	242.776	0	0	0	0	0	0	0	0	0	0	0	0.00707075	11	60
	polyprenols	C50H82O	0	0	0	0	0	0	0	0	0	0	0	0	0.233634	0	0	0	0	0	0	0.157519	0	0	0	0	10	39
		C50H83O4P	0	0	0	0	0	0	0	0	0	0	0	0	0.347799	0.1834	0.0468694	0	0	0	0.09456	0	0.13766	0	0	0	10	39
		C50H84O7P2	0	0	0	0	0	0	0	0	0	0	0	0	0	0.499237	0	0	0	0	0	0.08332	0.179727	0	0	0	10	39
Total															100	100	100	100	100	100	100	100	100	100	100	100

## Sheet: Table S2
Supplementary Table S2. Step-wise analysis of the LC-MS data availed after target molecule screening by MassHunter 10.0.2
Representative Analysis of IML 3.0 data aquired on 03/03/2023 (All the other data were aanalysed in similar pattern with reserpine as internal standard)
Compound list derived upon analysing the abundance/area under the curve of known compounds using Find by Formula in MassHunter 10.0
Intensity of Reserpine			45015873
Cpd	Hits	Abund	Mining Algorithm	Area	Base Peak	Z Count	Score	File	End	Formula	Height	Ions	Polarity	Label	Max Z	Min Z	Mass	m/z	RT	Saturated	Start	Width	Diff (Tgt, mDa)	Diff (Tgt, ppm)	Score (Tgt)	Flags (Tgt)	Flag Severity (Tgt)	Flag Severity Code (Tgt)	Sample Type	Instrument Name	Position	Acq Method	DA Method	IRM Calibration status
1049	1	501307	Find by Formula	8579181	228.232	1	70.81	IML3 1.d	29.387	C38 H55 N5 O10	1300066	4	Positive	Cpd 1049: C38 H55 N5 O10; 29.070	1	1	741.401	742.408	29.07		28.891	0.098	5.91	7.97	70.81		Pass	0	Sample	LCMS QTOF	P2-F6	Msm lipids reserpine waterACN 03032023.m	LCMS_Anjana_ShK Lab.m	Success
1323	1	2074	Find by Formula	16569	585.871	1	71.3	IML3 1.d	23.928	C15 H30 O4	2893	2	Positive	Cpd 1323: C15 H30 O4; 23.812	1	1	274.213	275.22	23.812		23.778	10.412	-1.17	-4.25	71.3		Pass	0	Sample	LCMS QTOF	P2-F6	Msm lipids reserpine waterACN 03032023.m	LCMS_Anjana_ShK Lab.m	Success
2433	1	9440	Find by Formula	415875	149.023	1	96.81	IML3 1.d	27.257	C16 H31 O7 P	21452	3	Positive	Cpd 2433: C16 H31 O7 P; 26.491	1	1	366.181	367.188	26.491		26.291	0.297	0.36	0.97	96.81		Pass	0	Sample	LCMS QTOF	P2-F6	Msm lipids reserpine waterACN 03032023.m	LCMS_Anjana_ShK Lab.m	Success
2849	1	3271	Find by Formula	35931	221.117	1	92.11	IML3 1.d	23.662	C22 H41 O12 P	5614	3	Positive	Cpd 2849: C22 H41 O12 P; 23.546	1	1	528.234	529.241	23.546		23.462	0.106	0.83	1.58	92.11		Pass	0	Sample	LCMS QTOF	P2-F6	Msm lipids reserpine waterACN 03032023.m	LCMS_Anjana_ShK Lab.m	Success
1325	1	3552	Find by Formula	195080	521.336	1	84.03	IML3 1.d	14.293	C16 H32 O4	6566	2	Positive	Cpd 1325: C16 H32 O4; 13.893	1	1	288.231	289.238	13.893		13.361	0.515	0.48	1.67	84.03		Pass	0	Sample	LCMS QTOF	P2-F6	Msm lipids reserpine waterACN 03032023.m	LCMS_Anjana_ShK Lab.m	Success
659	1	15820	Find by Formula	625644	521.336	1	95.33	IML3 1.d	14.343	C17 H34 O4	29297	3	Positive	Cpd 659: C17 H34 O4; 14.176	1	1	302.246	303.254	14.176		13.511	0.318	0.6	1.99	95.33		Pass	0	Sample	LCMS QTOF	P2-F6	Msm lipids reserpine waterACN 03032023.m	LCMS_Anjana_ShK Lab.m	Success
1242	1	14761	Find by Formula	327382	475.297	1	84.15	IML3 1.d	28.338	C14 H28 O2	40737	2	Positive	Cpd 1242: C14 H28 O2; 28.022	1	1	228.208	229.215	28.022		27.839	0.104	-0.8	-3.52	84.15		Pass	0	Sample	LCMS QTOF	P2-F6	Msm lipids reserpine waterACN 03032023.m	LCMS_Anjana_ShK Lab.m	Success
2722	1	4853	Find by Formula	58147	228.232	1	78.73	IML3 1.d	29.021	C20 H39 O9 P	9523	2	Positive	Cpd 2722: C20 H39 O9 P; 28.904	1	1	454.233	455.24	28.904		28.804	0.092	0.27	0.6	78.73		Pass	0	Sample	LCMS QTOF	P2-F6	Msm lipids reserpine waterACN 03032023.m	LCMS_Anjana_ShK Lab.m	Success
2436	1	232612	Find by Formula	2177498	270.315	1	77.78	IML3 1.d	30.369	C17 H35 O7 P	449504	3	Positive	Cpd 2436: C17 H35 O7 P; 30.152	1	1	382.215	383.222	30.152		30.037	0.073	2.7	7.07	77.78		Pass	0	Sample	LCMS QTOF	P2-F6	Msm lipids reserpine waterACN 03032023.m	LCMS_Anjana_ShK Lab.m	Success
1241	1	69380	Find by Formula	953845	225.197	1	76.15	IML3 1.d	19.768	C14 H26 O2	128760	3	Positive	Cpd 1241: C14 H26 O2; 19.352	1	1	226.194	227.202	19.352		19.252	0.105	0.94	4.14	76.15		Pass	0	Sample	LCMS QTOF	P2-F6	Msm lipids reserpine waterACN 03032023.m	LCMS_Anjana_ShK Lab.m	Success
1327	1	29712	Find by Formula	280102	228.232	1	91.62	IML3 1.d	29.154	C18 H34 O4	54233	3	Positive	Cpd 1327: C18 H34 O4; 29.004	1	1	314.245	315.252	29.004		28.921	0.079	-1.11	-3.52	91.62		Pass	0	Sample	LCMS QTOF	P2-F6	Msm lipids reserpine waterACN 03032023.m	LCMS_Anjana_ShK Lab.m	Success
1328	1	2560	Find by Formula	232614	384.773	1	85.48	IML3 1.d	16.173	C18 H36 O4	6028	3	Positive	Cpd 1328: C18 H36 O4; 15.458	1	1	316.262	317.269	15.458		14.642	0.433	0.21	0.67	85.48		Pass	0	Sample	LCMS QTOF	P2-F6	Msm lipids reserpine waterACN 03032023.m	LCMS_Anjana_ShK Lab.m	Success
1243	1	4377	Find by Formula	41154	149.023	1	80.36	IML3 1.d	25.808	C15 H28 O2	6926	2	Positive	Cpd 1243: C15 H28 O2; 25.692	1	1	240.208	241.215	25.692		25.592	0.105	-1.01	-4.19	80.36		Pass	0	Sample	LCMS QTOF	P2-F6	Msm lipids reserpine waterACN 03032023.m	LCMS_Anjana_ShK Lab.m	Success
2438	1	8970	Find by Formula	89239	1278.87	1	80.1	IML3 1.d	30.866	C18 H37 O7 P	16954	3	Positive	Cpd 2438: C18 H37 O7 P; 30.735	1	1	396.23	397.237	30.735		30.654	0.084	2.39	6.03	80.1		Pass	0	Sample	LCMS QTOF	P2-F6	Msm lipids reserpine waterACN 03032023.m	LCMS_Anjana_ShK Lab.m	Success
205	1	41093	Find by Formula	1026257	445.222	1	97.35	IML3 1.d	24.023	C21 H44 N O7 P	74361	3	Positive	Cpd 205: C21 H44 N O7 P; 23.462	1	1	453.285	454.292	23.462		23.312	0.189	-0.93	-2.04	97.35		Pass	0	Sample	LCMS QTOF	P2-F6	Msm lipids reserpine waterACN 03032023.m	LCMS_Anjana_ShK Lab.m	Success
1245	1	48920	Find by Formula	495730	280.263	1	97.25	IML3 1.d	29.052	C16 H30 O2	87107	3	Positive	Cpd 1245: C16 H30 O2; 28.854	1	1	254.224	255.231	28.854		28.721	0.086	-0.74	-2.92	97.25		Pass	0	Sample	LCMS QTOF	P2-F6	Msm lipids reserpine waterACN 03032023.m	LCMS_Anjana_ShK Lab.m	Success
1330	1	48884	Find by Formula	608628	440.411	1	91.46	IML3 1.d	29.453	C19 H38 O4	91944	3	Positive	Cpd 1330: C19 H38 O4; 29.137	1	1	330.276	331.283	29.137		29.033	0.095	-1.06	-3.22	91.46		Pass	0	Sample	LCMS QTOF	P2-F6	Msm lipids reserpine waterACN 03032023.m	LCMS_Anjana_ShK Lab.m	Success
204	1	10445	Find by Formula	340727	440.269	1	80.56	IML3 1.d	22.098	C21 H42 N O7 P	28846	2	Positive	Cpd 204: C21 H42 N O7 P; 21.515	1	1	451.269	452.276	21.515		21.365	0.148	-0.98	-2.18	80.56		Pass	0	Sample	LCMS QTOF	P2-F6	Msm lipids reserpine waterACN 03032023.m	LCMS_Anjana_ShK Lab.m	Success
2853	1	2515	Find by Formula	34739	325.227	1	77.79	IML3 1.d	18.418	C25 H49 O12 P	6364	2	Positive	Cpd 2853: C25 H49 O12 P; 18.270	1	1	572.295	573.303	18.27		18.204	0.087	-0.75	-1.3	77.79		Pass	0	Sample	LCMS QTOF	P2-F6	Msm lipids reserpine waterACN 03032023.m	LCMS_Anjana_ShK Lab.m	Success
2327	1	3594	Find by Formula	137245	254.249	1	75.45	IML3 1.d	27.772	C16 H32 O2	14679	2	Positive	Cpd 2327: C16 H32 O2; 27.723	1	1	256.24	257.248	27.723		27.423	0.167	-0.49	-1.92	75.45		Pass	0	Sample	LCMS QTOF	P2-F6	Msm lipids reserpine waterACN 03032023.m	LCMS_Anjana_ShK Lab.m	Success
359	1	2426	Find by Formula	34795	246.242	1	72.06	IML3 1.d	18.719	C31 H59 O17 P	5755	2	Positive	Cpd 359: C31 H59 O17 P; 18.603	1	1	734.348	735.355	18.603		18.52	0.099	-0.7	-0.95	72.06		Pass	0	Sample	LCMS QTOF	P2-F6	Msm lipids reserpine waterACN 03032023.m	LCMS_Anjana_ShK Lab.m	Success
2885	1	2426	Find by Formula	34795	246.242	1	72.06	IML3 1.d	18.719	C31 H59 O17 P	5755	2	Positive	Cpd 2885: C31 H59 O17 P; 18.603	1	1	734.348	735.355	18.603		18.52	0.099	-0.7	-0.95	72.06		Pass	0	Sample	LCMS QTOF	P2-F6	Msm lipids reserpine waterACN 03032023.m	LCMS_Anjana_ShK Lab.m	Success
247	1	1927	Find by Formula	19244	280.263	1	71.39	IML3 1.d	28.871	C22 H45 O9 P	3311	2	Positive	Cpd 247: C22 H45 O9 P; 28.754	1	1	484.281	485.288	28.754		28.688	1.139	0.6	1.25	71.39		Pass	0	Sample	LCMS QTOF	P2-F6	Msm lipids reserpine waterACN 03032023.m	LCMS_Anjana_ShK Lab.m	Success
1246	1	118295	Find by Formula	1211565	254.247	1	98.37	IML3 1.d	28.355	C17 H32 O2	209485	3	Positive	Cpd 1246: C17 H32 O2; 28.172	1	1	268.24	269.247	28.172		28.022	0.087	-0.63	-2.36	98.37		Pass	0	Sample	LCMS QTOF	P2-F6	Msm lipids reserpine waterACN 03032023.m	LCMS_Anjana_ShK Lab.m	Success
360	1	2626	Find by Formula	33116	840.569	1	86.76	IML3 1.d	24.375	C32 H61 O17 P	6177	3	Positive	Cpd 360: C32 H61 O17 P; 24.294	1	1	748.363	749.371	24.294		24.198	0.087	-1.48	-1.98	86.76		Pass	0	Sample	LCMS QTOF	P2-F6	Msm lipids reserpine waterACN 03032023.m	LCMS_Anjana_ShK Lab.m	Success
1332	1	2554	Find by Formula	20398	149.023	1	82.65	IML3 1.d	26.558	C20 H40 O4	4034	2	Positive	Cpd 1332: C20 H40 O4; 26.474	1	1	344.293	345.3	26.474		26.408	0.083	0.19	0.55	82.65		Pass	0	Sample	LCMS QTOF	P2-F6	Msm lipids reserpine waterACN 03032023.m	LCMS_Anjana_ShK Lab.m	Success
2196	1	8397	Find by Formula	201161	795.469	1	75.14	IML3 1.d	14.671	C44 H69 N5 O9	20138	3	Positive	Cpd 2196: C44 H69 N5 O9; 14.443	1	1	811.514	812.52	14.443		14.233	0.186	3.99	4.91	75.14		Pass	0	Sample	LCMS QTOF	P2-F6	Msm lipids reserpine waterACN 03032023.m	LCMS_Anjana_ShK Lab.m	Success
2184	1	9921	Find by Formula	129224	430.244	1	75.05	IML3 1.d	13.319	C44 H69 N5 O10	23000	3	Positive	Cpd 2184: C44 H69 N5 O10; 13.194	1	1	827.508	828.516	13.194		13.114	0.093	3.8	4.59	75.05		Pass	0	Sample	LCMS QTOF	P2-F6	Msm lipids reserpine waterACN 03032023.m	LCMS_Anjana_ShK Lab.m	Success
1247	1	31085	Find by Formula	364735	149.023	1	97.87	IML3 1.d	25.925	C18 H34 O2	47134	3	Positive	Cpd 1247: C18 H34 O2; 25.759	1	1	282.255	283.262	25.759		25.609	0.108	-0.65	-2.3	97.87		Pass	0	Sample	LCMS QTOF	P2-F6	Msm lipids reserpine waterACN 03032023.m	LCMS_Anjana_ShK Lab.m	Success
2579	1	14768	Find by Formula	328406	796.544	1	93.16	IML3 1.d	24.511	C23 H46 N O7 P	26955	3	Positive	Cpd 2579: C23 H46 N O7 P; 24.211	1	1	479.302	480.31	24.211		24.045	0.189	0.39	0.81	93.16		Pass	0	Sample	LCMS QTOF	P2-F6	Msm lipids reserpine waterACN 03032023.m	LCMS_Anjana_ShK Lab.m	Success
1333	1	4085	Find by Formula	36705	468.442	1	82.54	IML3 1.d	31.783	C21 H40 O4	7880	2	Positive	Cpd 1333: C21 H40 O4; 31.700	1	1	356.292	357.3	31.7		31.617	0.069	-0.28	-0.8	82.54		Pass	0	Sample	LCMS QTOF	P2-F6	Msm lipids reserpine waterACN 03032023.m	LCMS_Anjana_ShK Lab.m	Success
2443	1	6038	Find by Formula	55973	228.232	1	75.33	IML3 1.d	29.003	C21 H41 O7 P	10691	2	Positive	Cpd 2443: C21 H41 O7 P; 28.937	1	1	436.259	437.266	28.937		28.822	0.08	0.06	0.13	75.33		Pass	0	Sample	LCMS QTOF	P2-F6	Msm lipids reserpine waterACN 03032023.m	LCMS_Anjana_ShK Lab.m	Success
2212	1	41627	Find by Formula	1129536	1271.82	1	87.66	IML3 1.d	30.502	C46 H73 N5 O8	127893	3	Positive	Cpd 2212: C46 H73 N5 O8; 30.202	1	1	823.547	824.554	30.202		30.036	0.126	0.68	0.82	87.66		Pass	0	Sample	LCMS QTOF	P2-F6	Msm lipids reserpine waterACN 03032023.m	LCMS_Anjana_ShK Lab.m	Success
1335	1	4290	Find by Formula	50405	473.318	1	83.71	IML3 1.d	32.094	C22 H42 O4	9593	2	Positive	Cpd 1335: C22 H42 O4; 31.933	1	1	370.308	371.315	31.933		31.821	0.076	-0.09	-0.25	83.71		Pass	0	Sample	LCMS QTOF	P2-F6	Msm lipids reserpine waterACN 03032023.m	LCMS_Anjana_ShK Lab.m	Success
529	1	3447	Find by Formula	53666	531.275	1	81.35	IML3 1.d	28.671	C46 H83 O27 P	9538	4	Positive	Cpd 529: C46 H83 O27 P; 28.571	1	1	1098.49	1099.49	28.571		28.488	0.092	0.03	0.03	81.35		Pass	0	Sample	LCMS QTOF	P2-F6	Msm lipids reserpine waterACN 03032023.m	LCMS_Anjana_ShK Lab.m	Success
2856	1	6992	Find by Formula	341876	135.08	1	76.36	IML3 1.d	13.794	C28 H53 O12 P	18666	3	Positive	Cpd 2856: C28 H53 O12 P; 13.178	1	1	612.332	613.339	13.178		12.963	0.265	4.33	7.08	76.36		Pass	0	Sample	LCMS QTOF	P2-F6	Msm lipids reserpine waterACN 03032023.m	LCMS_Anjana_ShK Lab.m	Success
2187	1	3661	Find by Formula	87803	430.244	1	72.42	IML3 1.d	14.721	C46 H73 N5 O10	8433	3	Positive	Cpd 2187: C46 H73 N5 O10; 14.592	1	1	855.54	856.547	14.592		14.396	0.209	3.89	4.55	72.42		Pass	0	Sample	LCMS QTOF	P2-F6	Msm lipids reserpine waterACN 03032023.m	LCMS_Anjana_ShK Lab.m	Success
1248	1	114185	Find by Formula	2015176	280.264	1	96.95	IML3 1.d	28.488	C20 H38 O2	252777	3	Positive	Cpd 1248: C20 H38 O2; 28.172	1	1	310.286	311.294	28.172		28.055	0.095	-0.85	-2.76	96.95		Pass	0	Sample	LCMS QTOF	P2-F6	Msm lipids reserpine waterACN 03032023.m	LCMS_Anjana_ShK Lab.m	Success
2447	1	4225	Find by Formula	36017	270.317	1	71.9	IML3 1.d	30.052	C23 H47 O7 P	6834	2	Positive	Cpd 2447: C23 H47 O7 P; 29.952	1	1	466.307	467.315	29.952		29.886	0.088	1.5	3.21	71.9		Pass	0	Sample	LCMS QTOF	P2-F6	Msm lipids reserpine waterACN 03032023.m	LCMS_Anjana_ShK Lab.m	Success
2860	1	208524	Find by Formula	3498368	603.415	1	89.31	IML3 1.d	24.86	C30 H57 O12 P	522698	3	Positive	Cpd 2860: C30 H57 O12 P; 24.611	1	1	640.358	641.366	24.611		24.471	0.099	-0.82	-1.28	89.31		Pass	0	Sample	LCMS QTOF	P2-F6	Msm lipids reserpine waterACN 03032023.m	LCMS_Anjana_ShK Lab.m	Success
1336	1	2037	Find by Formula	46774	149.023	1	88.28	IML3 1.d	25.842	C24 H48 O4	4070	3	Positive	Cpd 1336: C24 H48 O4; 25.676	1	1	400.356	401.363	25.676		25.443	0.204	0.47	1.18	88.28		Pass	0	Sample	LCMS QTOF	P2-F6	Msm lipids reserpine waterACN 03032023.m	LCMS_Anjana_ShK Lab.m	Success
2204	1	11090	Find by Formula	406174	270.317	1	84.94	IML3 1.d	30.418	C48 H77 N5 O9	41662	3	Positive	Cpd 2204: C48 H77 N5 O9; 30.019	1	1	867.571	868.579	30.019		29.886	0.106	-0.77	-0.88	84.94		Pass	0	Sample	LCMS QTOF	P2-F6	Msm lipids reserpine waterACN 03032023.m	LCMS_Anjana_ShK Lab.m	Success
2737	1	5579	Find by Formula	194840	599.391	1	81.55	IML3 1.d	15.907	C27 H55 O9 P	14289	3	Positive	Cpd 2737: C27 H55 O9 P; 15.741	1	1	554.355	555.363	15.741		15.341	0.18	-3.04	-5.49	81.55		Pass	0	Sample	LCMS QTOF	P2-F6	Msm lipids reserpine waterACN 03032023.m	LCMS_Anjana_ShK Lab.m	Success
2448	1	96978	Find by Formula	1206191	928.621	1	74.77	IML3 1.d	24.442	C24 H47 O7 P	178140	3	Positive	Cpd 2448: C24 H47 O7 P; 24.111	1	1	478.305	479.314	24.111		24.028	0.104	-0.48	-1	74.77		Pass	0	Sample	LCMS QTOF	P2-F6	Msm lipids reserpine waterACN 03032023.m	LCMS_Anjana_ShK Lab.m	Success
2190	1	7779	Find by Formula	106347	270.316	1	73.93	IML3 1.d	30.252	C48 H77 N5 O10	10833	3	Positive	Cpd 2190: C48 H77 N5 O10; 30.136	1	1	883.571	884.579	30.136		29.987	0.177	3.43	3.88	73.93		Pass	0	Sample	LCMS QTOF	P2-F6	Msm lipids reserpine waterACN 03032023.m	LCMS_Anjana_ShK Lab.m	Success
2738	1	20218	Find by Formula	1277149	599.391	1	87.14	IML3 1.d	15.717	C28 H55 O9 P	64426	4	Positive	Cpd 2738: C28 H55 O9 P; 15.408	1	1	566.356	567.364	15.408		14.699	0.243	-2.35	-4.14	87.14		Pass	0	Sample	LCMS QTOF	P2-F6	Msm lipids reserpine waterACN 03032023.m	LCMS_Anjana_ShK Lab.m	Success
2588	1	4671	Find by Formula	103543	468.442	1	81.78	IML3 1.d	31.317	C27 H56 N O7 P	12622	4	Positive	Cpd 2588: C27 H56 N O7 P; 31.051	1	1	537.378	538.385	31.051		30.934	0.12	-1.68	-3.12	81.78		Pass	0	Sample	LCMS QTOF	P2-F6	Msm lipids reserpine waterACN 03032023.m	LCMS_Anjana_ShK Lab.m	Success
2739	1	11703	Find by Formula	311230	663.455	1	76.11	IML3 1.d	35.891	C28 H57 O9 P	28544	4	Positive	Cpd 2739: C28 H57 O9 P; 35.627	1	1	568.377	569.385	35.627		35.43	0.162	3.34	5.88	76.11		Pass	0	Sample	LCMS QTOF	P2-F6	Msm lipids reserpine waterACN 03032023.m	LCMS_Anjana_ShK Lab.m	Success
2862	1	1991	Find by Formula	22894	521.336	1	70.39	IML3 1.d	14.193	C31 H59 O12 P	3741	2	Positive	Cpd 2862: C31 H59 O12 P; 14.126	1	1	654.375	655.381	14.126		14.027	0.115	0.22	0.33	70.39		Pass	0	Sample	LCMS QTOF	P2-F6	Msm lipids reserpine waterACN 03032023.m	LCMS_Anjana_ShK Lab.m	Success
867	1	6058	Find by Formula	131180	691.467	1	88.67	IML3 1.d	24.55	C36 H64 O13	12851	3	Positive	Cpd 867: C36 H64 O13; 24.328	1	1	704.436	705.442	24.328		24.221	0.21	0.91	1.29	88.67		Pass	0	Sample	LCMS QTOF	P2-F6	Msm lipids reserpine waterACN 03032023.m	LCMS_Anjana_ShK Lab.m	Success
2468	1	9467	Find by Formula	213914	485.359	1	86.35	IML3 1.d	13.893	C29 H54 N O8 P	20526	3	Positive	Cpd 2468: C29 H54 N O8 P; 13.511	1	1	575.358	576.366	13.511		13.427	0.158	-0.77	-1.33	86.35		Pass	0	Sample	LCMS QTOF	P2-F6	Msm lipids reserpine waterACN 03032023.m	LCMS_Anjana_ShK Lab.m	Success
2331	1	13231	Find by Formula	570349	254.248	1	73	IML3 1.d	28.365	C27 H51 O8 P	32451	2	Positive	Cpd 2331: C27 H51 O8 P; 27.955	1	1	534.331	535.338	27.955		27.639	0.257	-0.73	-1.37	73		Pass	0	Sample	LCMS QTOF	P2-F6	Msm lipids reserpine waterACN 03032023.m	LCMS_Anjana_ShK Lab.m	Success
2757	1	162284	Find by Formula	5798150	441.789	1	97.77	IML3 1.d	17.172	C34 H65 O13 P	432701	4	Positive	Cpd 2757: C34 H65 O13 P; 16.689	1	1	712.415	713.423	16.689		16.342	0.202	-1.09	-1.54	97.77		Pass	0	Sample	LCMS QTOF	P2-F6	Msm lipids reserpine waterACN 03032023.m	LCMS_Anjana_ShK Lab.m	Success
2100	1	3736	Find by Formula	38358	270.315	1	80.95	IML3 1.d	30.267	C25 H50 O3	4819	3	Positive	Cpd 2100: C25 H50 O3; 30.169	1	1	398.377	399.386	30.169		30.021	0.137	1.24	3.12	80.95		Pass	0	Sample	LCMS QTOF	P2-F6	Msm lipids reserpine waterACN 03032023.m	LCMS_Anjana_ShK Lab.m	Success
871	1	8204	Find by Formula	181048	445.222	1	80.04	IML3 1.d	23.912	C37 H68 O13	22652	3	Positive	Cpd 871: C37 H68 O13; 23.645	1	1	720.465	721.471	23.645		23.462	0.103	-1.4	-1.94	80.04		Pass	0	Sample	LCMS QTOF	P2-F6	Msm lipids reserpine waterACN 03032023.m	LCMS_Anjana_ShK Lab.m	Success
2457	1	779054	Find by Formula	42466680	537.395	1	78.27	IML3 1.d	33.389	C28 H57 O7 P	1529656	4	Positive	Cpd 2457: C28 H57 O7 P; 32.698	1	1	536.388	537.395	32.698		32.288	0.477	3.39	6.31	78.27		Pass	0	Sample	LCMS QTOF	P2-F6	Msm lipids reserpine waterACN 03032023.m	LCMS_Anjana_ShK Lab.m	Success
2868	1	109188	Find by Formula	2553953	282.279	1	77.37	IML3 1.d	31.117	C34 H65 O12 P	267181	3	Positive	Cpd 2868: C34 H65 O12 P; 30.635	1	1	696.425	697.432	30.635		30.418	0.142	3.39	4.86	77.37		Pass	0	Sample	LCMS QTOF	P2-F6	Msm lipids reserpine waterACN 03032023.m	LCMS_Anjana_ShK Lab.m	Success
2456	1	8226	Find by Formula	130942	939.587	1	75.97	IML3 1.d	32.394	C28 H55 O7 P	19039	3	Positive	Cpd 2456: C28 H55 O7 P; 32.232	1	1	534.367	535.375	32.232		32.053	0.106	-1.4	-2.62	75.97		Pass	0	Sample	LCMS QTOF	P2-F6	Msm lipids reserpine waterACN 03032023.m	LCMS_Anjana_ShK Lab.m	Success
2333	1	41190	Find by Formula	990196	278.247	1	75.42	IML3 1.d	27.235	C28 H51 O8 P	88494	4	Positive	Cpd 2333: C28 H51 O8 P; 26.824	1	1	546.33	547.337	26.824		26.724	0.206	-2	-3.66	75.42		Pass	0	Sample	LCMS QTOF	P2-F6	Msm lipids reserpine waterACN 03032023.m	LCMS_Anjana_ShK Lab.m	Success
2335	1	2795	Find by Formula	44189	537.395	1	72.1	IML3 1.d	32.771	C28 H55 O8 P	5408	2	Positive	Cpd 2335: C28 H55 O8 P; 32.615	1	1	550.364	551.372	32.615		32.482	0.131	0.98	1.78	72.1		Pass	0	Sample	LCMS QTOF	P2-F6	Msm lipids reserpine waterACN 03032023.m	LCMS_Anjana_ShK Lab.m	Success
873	1	5858572	Find by Formula	99036832	691.467	1	91.69	IML3 1.d	24.827	C38 H70 O13	14943104	7	Positive	Cpd 873: C38 H70 O13; 24.411	1	1	734.484	735.491	24.411		24.261	0.104	2.15	2.93	91.69		Pass	0	Sample	LCMS QTOF	P2-F6	Msm lipids reserpine waterACN 03032023.m	LCMS_Anjana_ShK Lab.m	Success
2758	1	4418	Find by Formula	56867	228.232	1	89.84	IML3 1.d	29.07	C35 H65 O13 P	11011	3	Positive	Cpd 2758: C35 H65 O13 P; 28.971	1	1	724.416	725.423	28.971		28.904	0.083	-0.2	-0.28	89.84		Pass	0	Sample	LCMS QTOF	P2-F6	Msm lipids reserpine waterACN 03032023.m	LCMS_Anjana_ShK Lab.m	Success
2613	1	51501	Find by Formula	570453	280.265	1	74.13	IML3 1.d	28.536	C32 H63 O10 P	118189	3	Positive	Cpd 2613: C32 H63 O10 P; 28.405	1	1	638.418	639.425	28.405		28.322	0.074	2.57	4.03	74.13		Pass	0	Sample	LCMS QTOF	P2-F6	Msm lipids reserpine waterACN 03032023.m	LCMS_Anjana_ShK Lab.m	Success
2460	1	62607	Find by Formula	2131658	440.411	1	84.52	IML3 1.d	29.42	C30 H61 O7 P	80677	3	Positive	Cpd 2460: C30 H61 O7 P; 28.804	1	1	564.418	565.425	28.804		28.571	0.545	2.33	4.12	84.52		Pass	0	Sample	LCMS QTOF	P2-F6	Msm lipids reserpine waterACN 03032023.m	LCMS_Anjana_ShK Lab.m	Success
2760	1	4015	Find by Formula	55917	440.411	1	81.55	IML3 1.d	29.337	C36 H65 O13 P	10553	3	Positive	Cpd 2760: C36 H65 O13 P; 29.204	1	1	736.418	737.423	29.204		29.137	0.086	1.5	2.04	81.55		Pass	0	Sample	LCMS QTOF	P2-F6	Msm lipids reserpine waterACN 03032023.m	LCMS_Anjana_ShK Lab.m	Success
2762	1	68159	Find by Formula	2496202	282.279	1	80.54	IML3 1.d	31.434	C36 H69 O13 P	166393	3	Positive	Cpd 2762: C36 H69 O13 P; 30.435	1	1	740.451	741.458	30.435		30.252	0.229	2.97	4.01	80.54		Pass	0	Sample	LCMS QTOF	P2-F6	Msm lipids reserpine waterACN 03032023.m	LCMS_Anjana_ShK Lab.m	Success
1868	1	68232	Find by Formula	1279186	254.247	1	99.06	IML3 1.d	28.172	C66 H114 N4 O17	157653	5	Positive	Cpd 1868: C66 H114 N4 O17; 28.005	1	1	1234.82	1235.82	28.005		27.822	0.107	-0.61	-0.49	99.06		Pass	0	Sample	LCMS QTOF	P2-F6	Msm lipids reserpine waterACN 03032023.m	LCMS_Anjana_ShK Lab.m	Success
1865	1	32679	Find by Formula	2215769	440.411	1	90.77	IML3 1.d	30.002	C66 H108 N4 O17	81780	4	Positive	Cpd 1865: C66 H108 N4 O17; 29.487	1	1	1228.77	1229.77	29.487		29.254	0.573	-3.66	-2.98	90.77		Pass	0	Sample	LCMS QTOF	P2-F6	Msm lipids reserpine waterACN 03032023.m	LCMS_Anjana_ShK Lab.m	Success
875	1	2073	Find by Formula	45447	440.269	1	88.8	IML3 1.d	22.164	C40 H70 O13	3982	3	Positive	Cpd 875: C40 H70 O13; 22.014	1	1	758.481	759.489	22.014		21.798	6.555	-0.46	-0.6	88.8		Pass	0	Sample	LCMS QTOF	P2-F6	Msm lipids reserpine waterACN 03032023.m	LCMS_Anjana_ShK Lab.m	Success
1996	1	3668	Find by Formula	139435	270.316	1	86.16	IML3 1.d	30.369	C69 H114 N4 O20	10699	4	Positive	Cpd 1996: C69 H114 N4 O20; 30.069	1	1	1318.81	1319.81	30.069		29.936	0.2	2.81	2.13	86.16		Pass	0	Sample	LCMS QTOF	P2-F6	Msm lipids reserpine waterACN 03032023.m	LCMS_Anjana_ShK Lab.m	Success
1347	1	2421	Find by Formula	484679	764.575	1	79.96	IML3 1.d	35.827	C31 H62 O4	8537	3	Positive	Cpd 1347: C31 H62 O4; 33.830	1	1	498.466	499.473	33.83		33.53	0.871	1.27	2.56	79.96		Pass	0	Sample	LCMS QTOF	P2-F6	Msm lipids reserpine waterACN 03032023.m	LCMS_Anjana_ShK Lab.m	Success
2340	1	20260	Find by Formula	481556	563.858	1	73.09	IML3 1.d	24.089	C31 H57 O8 P	57748	3	Positive	Cpd 2340: C31 H57 O8 P; 23.795	1	1	588.383	589.39	23.795		23.662	0.114	3.91	6.64	73.09		Pass	0	Sample	LCMS QTOF	P2-F6	Msm lipids reserpine waterACN 03032023.m	LCMS_Anjana_ShK Lab.m	Success
1956	1	18221	Find by Formula	617006	282.279	1	72.77	IML3 1.d	30.968	C73 H118 N4 O21	59697	4	Positive	Cpd 1956: C73 H118 N4 O21; 30.585	1	1	1386.84	1387.84	30.585		30.385	0.158	7.6	5.48	72.77		Pass	0	Sample	LCMS QTOF	P2-F6	Msm lipids reserpine waterACN 03032023.m	LCMS_Anjana_ShK Lab.m	Success
1749	1	3263	Find by Formula	44707	440.268	1	71.37	IML3 1.d	22.263	C67 H116 N4 O19	7218	3	Positive	Cpd 1749: C67 H116 N4 O19; 22.164	1	1	1280.82	1281.83	22.164		22.065	0.105	-0.92	-0.72	71.37		Pass	0	Sample	LCMS QTOF	P2-F6	Msm lipids reserpine waterACN 03032023.m	LCMS_Anjana_ShK Lab.m	Success
1873	1	135053	Find by Formula	2064724	270.315	1	98.55	IML3 1.d	30.252	C67 H116 N4 O17	311328	4	Positive	Cpd 1873: C67 H116 N4 O17; 30.185	1	1	1248.83	1249.84	30.185		30.102	0.137	-0.29	-0.23	98.55		Pass	0	Sample	LCMS QTOF	P2-F6	Msm lipids reserpine waterACN 03032023.m	LCMS_Anjana_ShK Lab.m	Success
1870	1	16559	Find by Formula	797004	438.504	1	90.56	IML3 1.d	35.594	C67 H110 N4 O17	29292	4	Positive	Cpd 1870: C67 H110 N4 O17; 35.278	1	1	1242.78	1243.79	35.278		34.795	0.438	-2.07	-1.67	90.56		Pass	0	Sample	LCMS QTOF	P2-F6	Msm lipids reserpine waterACN 03032023.m	LCMS_Anjana_ShK Lab.m	Success
2766	1	1502	Find by Formula	25522	795.469	1	81.27	IML3 1.d	14.437	C38 H69 O13 P	3212	3	Positive	Cpd 2766: C38 H69 O13 P; 14.326	1	1	764.446	765.452	14.326		14.212	0.164	-1.61	-2.1	81.27		Pass	0	Sample	LCMS QTOF	P2-F6	Msm lipids reserpine waterACN 03032023.m	LCMS_Anjana_ShK Lab.m	Success
2064	1	31566	Find by Formula	1202248	764.575	1	75.19	IML3 1.d	34.544	C70 H125 N4 O19	93571	4	Positive	Cpd 2064: C70 H125 N4 O19; 34.263	1	1	1325.89	1326.9	34.263		33.93	0.174	0.7	0.52	75.19		Pass	0	Sample	LCMS QTOF	P2-F6	Msm lipids reserpine waterACN 03032023.m	LCMS_Anjana_ShK Lab.m	Success
1921	1	9857	Find by Formula	708837	440.411	1	74.86	IML3 1.d	29.952	C62 H104 N4 O15	20815	3	Positive	Cpd 1921: C62 H104 N4 O15; 29.420	1	1	1144.75	1145.75	29.42		28.871	0.695	-4.34	-3.79	74.86		Pass	0	Sample	LCMS QTOF	P2-F6	Msm lipids reserpine waterACN 03032023.m	LCMS_Anjana_ShK Lab.m	Success
2342	1	1219454	Find by Formula	14867881	603.415	1	73.01	IML3 1.d	24.86	C32 H61 O8 P	2464704	3	Positive	Cpd 2342: C32 H61 O8 P; 24.611	1	1	604.41	605.418	24.611		24.461	0.092	-0.17	-0.28	73.01		Pass	0	Sample	LCMS QTOF	P2-F6	Msm lipids reserpine waterACN 03032023.m	LCMS_Anjana_ShK Lab.m	Success
1923	1	3854	Find by Formula	822139	270.316	1	71.33	IML3 1.d	30.651	C62 H108 N4 O15	17698	3	Positive	Cpd 1923: C62 H108 N4 O15; 29.120	1	1	1148.78	1149.79	29.12		28.405	0.668	-3.97	-3.45	71.33		Pass	0	Sample	LCMS QTOF	P2-F6	Msm lipids reserpine waterACN 03032023.m	LCMS_Anjana_ShK Lab.m	Success
1875	1	134581	Find by Formula	898156	475.297	1	94.37	IML3 1.d	28.103	C68 H112 N4 O17	175922	4	Positive	Cpd 1875: C68 H112 N4 O17; 28.022	1	1	1256.8	1257.81	28.022		27.938	0.086	-2.34	-1.86	94.37		Pass	0	Sample	LCMS QTOF	P2-F6	Msm lipids reserpine waterACN 03032023.m	LCMS_Anjana_ShK Lab.m	Success
1797	1	8967	Find by Formula	367213	282.279	1	81.14	IML3 1.d	30.685	C79 H130 N4 O24	40659	5	Positive	Cpd 1797: C79 H130 N4 O24; 30.468	1	1	1518.91	1519.92	30.468		30.252	0.137	6.75	4.44	81.14		Pass	0	Sample	LCMS QTOF	P2-F6	Msm lipids reserpine waterACN 03032023.m	LCMS_Anjana_ShK Lab.m	Success
2003	1	2403	Find by Formula	221469	270.316	1	79.25	IML3 1.d	30.385	C71 H114 N4 O20	11329	4	Positive	Cpd 2003: C71 H114 N4 O20; 30.102	1	1	1342.8	1343.81	30.102		29.357	0.152	-1.54	-1.15	79.25		Pass	0	Sample	LCMS QTOF	P2-F6	Msm lipids reserpine waterACN 03032023.m	LCMS_Anjana_ShK Lab.m	Success
2769	1	4250	Find by Formula	85495	406.329	1	79.11	IML3 1.d	32.549	C39 H75 O13 P	9724	3	Positive	Cpd 2769: C39 H75 O13 P; 32.432	1	1	782.495	783.501	32.432		32.275	0.149	0.34	0.43	79.11		Pass	0	Sample	LCMS QTOF	P2-F6	Msm lipids reserpine waterACN 03032023.m	LCMS_Anjana_ShK Lab.m	Success
2624	1	1069359	Find by Formula	13011143	691.466	1	72.51	IML3 1.d	24.744	C36 H69 O10 P	2214778	3	Positive	Cpd 2624: C36 H69 O10 P; 24.477	1	1	692.463	693.47	24.477		24.328	0.091	0.09	0.13	72.51		Pass	0	Sample	LCMS QTOF	P2-F6	Msm lipids reserpine waterACN 03032023.m	LCMS_Anjana_ShK Lab.m	Success
1880	1	632084	Find by Formula	17685628	270.316	1	98.1	IML3 1.d	30.269	C69 H114 N4 O17	1895646	5	Positive	Cpd 1880: C69 H114 N4 O17; 30.119	1	1	1270.82	1271.82	30.119		29.952	0.144	-0.96	-0.76	98.1		Pass	0	Sample	LCMS QTOF	P2-F6	Msm lipids reserpine waterACN 03032023.m	LCMS_Anjana_ShK Lab.m	Success
1882	1	27113	Find by Formula	300778	475.297	1	93.89	IML3 1.d	28.12	C69 H118 N4 O17	48320	4	Positive	Cpd 1882: C69 H118 N4 O17; 28.022	1	1	1274.85	1275.85	28.022		27.872	0.094	-1.6	-1.26	93.89		Pass	0	Sample	LCMS QTOF	P2-F6	Msm lipids reserpine waterACN 03032023.m	LCMS_Anjana_ShK Lab.m	Success
2348	1	9446	Find by Formula	193970	270.315	1	86.16	IML3 1.d	29.912	C34 H65 O8 P	26905	3	Positive	Cpd 2348: C34 H65 O8 P; 29.753	1	1	632.443	633.451	29.753		29.57	0.11	1.45	2.3	86.16		Pass	0	Sample	LCMS QTOF	P2-F6	Msm lipids reserpine waterACN 03032023.m	LCMS_Anjana_ShK Lab.m	Success
1763	1	35323	Find by Formula	1677460	764.575	1	83.44	IML3 1.d	34.523	C70 H124 N4 O19	131383	6	Positive	Cpd 1763: C70 H124 N4 O19; 34.263	1	1	1324.89	1325.9	34.263		33.93	0.174	5.53	4.17	83.44		Pass	0	Sample	LCMS QTOF	P2-F6	Msm lipids reserpine waterACN 03032023.m	LCMS_Anjana_ShK Lab.m	Success
886	1	8673	Find by Formula	493031	663.455	1	76.2	IML3 1.d	35.91	C43 H80 O13	20390	3	Positive	Cpd 886: C43 H80 O13; 35.594	1	1	804.563	805.572	35.594		35.111	0.403	3.48	4.32	76.2		Pass	0	Sample	LCMS QTOF	P2-F6	Msm lipids reserpine waterACN 03032023.m	LCMS_Anjana_ShK Lab.m	Success
2070	1	47575	Find by Formula	2323335	764.575	1	73.7	IML3 1.d	34.812	C72 H123 N4 O19	124482	3	Positive	Cpd 2070: C72 H123 N4 O19; 34.196	1	1	1347.88	1348.89	34.196		33.913	0.289	-0.41	-0.3	73.7		Pass	0	Sample	LCMS QTOF	P2-F6	Msm lipids reserpine waterACN 03032023.m	LCMS_Anjana_ShK Lab.m	Success
1927	1	5329	Find by Formula	1442434	270.316	1	73.37	IML3 1.d	31.317	C64 H106 N4 O15	23650	3	Positive	Cpd 1927: C64 H106 N4 O15; 29.137	1	1	1170.76	1171.77	29.137		28.372	1.225	-5.13	-4.38	73.37		Pass	0	Sample	LCMS QTOF	P2-F6	Msm lipids reserpine waterACN 03032023.m	LCMS_Anjana_ShK Lab.m	Success
1884	1	203827	Find by Formula	5862730	1234.84	1	92.61	IML3 1.d	31.234	C70 H114 N4 O17	655598	5	Positive	Cpd 1884: C70 H114 N4 O17; 30.751	1	1	1282.82	1283.82	30.751		30.552	0.134	-2.89	-2.25	92.61		Pass	0	Sample	LCMS QTOF	P2-F6	Msm lipids reserpine waterACN 03032023.m	LCMS_Anjana_ShK Lab.m	Success
1885	1	46238	Find by Formula	3625186	663.455	1	83.61	IML3 1.d	35.948	C70 H116 N4 O17	187922	4	Positive	Cpd 1885: C70 H116 N4 O17; 35.677	1	1	1284.83	1285.84	35.677		34.928	0.241	-3.42	-2.66	83.61		Pass	0	Sample	LCMS QTOF	P2-F6	Msm lipids reserpine waterACN 03032023.m	LCMS_Anjana_ShK Lab.m	Success
2883	1	7581	Find by Formula	403573	487.297	1	83.12	IML3 1.d	27.04	C47 H89 O18 P	28462	5	Positive	Cpd 2883: C47 H89 O18 P; 26.624	1	1	972.58	973.587	26.624		26.441	0.236	1.44	1.48	83.12		Pass	0	Sample	LCMS QTOF	P2-F6	Msm lipids reserpine waterACN 03032023.m	LCMS_Anjana_ShK Lab.m	Success
2174	1	15223	Find by Formula	975119	468.442	1	82.46	IML3 1.d	31.517	C57 H103 O10	41976	5	Positive	Cpd 2174: C57 H103 O10; 30.901	1	1	947.75	948.758	30.901		30.418	0.418	-4.67	-4.93	82.46		Pass	0	Sample	LCMS QTOF	P2-F6	Msm lipids reserpine waterACN 03032023.m	LCMS_Anjana_ShK Lab.m	Success
1887	1	8883	Find by Formula	1449610	663.454	1	74.9	IML3 1.d	35.906	C70 H120 N4 O17	28477	3	Positive	Cpd 1887: C70 H120 N4 O17; 35.660	1	1	1288.86	1289.87	35.66		34.098	1.258	-5.46	-4.24	74.9		Pass	0	Sample	LCMS QTOF	P2-F6	Msm lipids reserpine waterACN 03032023.m	LCMS_Anjana_ShK Lab.m	Success
2773	1	191967	Find by Formula	4794085	256.263	1	73.31	IML3 1.d	30.712	C41 H75 O13 P	451363	3	Positive	Cpd 2773: C41 H75 O13 P; 30.252	1	1	806.49	807.498	30.252		30.085	0.17	-4.11	-5.09	73.31		Pass	0	Sample	LCMS QTOF	P2-F6	Msm lipids reserpine waterACN 03032023.m	LCMS_Anjana_ShK Lab.m	Success
2491	1	3080	Find by Formula	218355	468.442	1	70.73	IML3 1.d	32.049	C37 H70 N O8 P	7526	3	Positive	Cpd 2491: C37 H70 N O8 P; 31.833	1	1	687.481	688.487	31.833		31.134	0.688	-3.37	-4.9	70.73		Pass	0	Sample	LCMS QTOF	P2-F6	Msm lipids reserpine waterACN 03032023.m	LCMS_Anjana_ShK Lab.m	Success
2774	1	3737	Find by Formula	88176	663.455	1	70.25	IML3 1.d	35.96	C41 H77 O13 P	9299	3	Positive	Cpd 2774: C41 H77 O13 P; 35.810	1	1	808.511	809.517	35.81		35.611	0.137	0.98	1.21	70.25		Pass	0	Sample	LCMS QTOF	P2-F6	Msm lipids reserpine waterACN 03032023.m	LCMS_Anjana_ShK Lab.m	Success
1889	1	90049	Find by Formula	369003	440.41	1	92.61	IML3 1.d	29.205	C71 H116 N4 O17	82126	5	Positive	Cpd 1889: C71 H116 N4 O17; 29.137	1	1	1296.83	1297.84	29.137		29.069	0.081	-3.39	-2.61	92.61		Pass	0	Sample	LCMS QTOF	P2-F6	Msm lipids reserpine waterACN 03032023.m	LCMS_Anjana_ShK Lab.m	Success
1975	1	81776	Find by Formula	2968357	282.279	1	92.39	IML3 1.d	30.834	C78 H130 N4 O21	343242	5	Positive	Cpd 1975: C78 H130 N4 O21; 30.485	1	1	1458.92	1459.93	30.485		30.285	0.125	-3.64	-2.5	92.39		Pass	0	Sample	LCMS QTOF	P2-F6	Msm lipids reserpine waterACN 03032023.m	LCMS_Anjana_ShK Lab.m	Success
1769	1	49787	Find by Formula	3340870	764.575	1	88.5	IML3 1.d	34.778	C72 H122 N4 O19	177050	6	Positive	Cpd 1769: C72 H122 N4 O19; 34.196	1	1	1346.87	1347.88	34.196		33.913	0.291	4.24	3.15	88.5		Pass	0	Sample	LCMS QTOF	P2-F6	Msm lipids reserpine waterACN 03032023.m	LCMS_Anjana_ShK Lab.m	Success
1892	1	2097	Find by Formula	164138	537.395	1	86.53	IML3 1.d	33.163	C71 H122 N4 O17	4768	3	Positive	Cpd 1892: C71 H122 N4 O17; 32.532	1	1	1302.88	1303.89	32.532		32.043	1.43	-1.59	-1.22	86.53		Pass	0	Sample	LCMS QTOF	P2-F6	Msm lipids reserpine waterACN 03032023.m	LCMS_Anjana_ShK Lab.m	Success
1371	1	2521	Find by Formula	175431	764.575	1	85.85	IML3 1.d	34.695	C36 H66 O5	5398	3	Positive	Cpd 1371: C36 H66 O5; 34.063	1	1	578.489	579.496	34.063		33.738	0.713	-1.78	-3.08	85.85		Pass	0	Sample	LCMS QTOF	P2-F6	Msm lipids reserpine waterACN 03032023.m	LCMS_Anjana_ShK Lab.m	Success
1894	1	24009	Find by Formula	1815885	764.575	1	93.08	IML3 1.d	34.845	C72 H118 N4 O17	73920	5	Positive	Cpd 1894: C72 H118 N4 O17; 34.712	1	1	1310.85	1311.85	34.712		33.88	0.468	-3.57	-2.72	93.08		Pass	0	Sample	LCMS QTOF	P2-F6	Msm lipids reserpine waterACN 03032023.m	LCMS_Anjana_ShK Lab.m	Success
2084	1	15864	Find by Formula	141414	468.441	1	77.9	IML3 1.d	31.19	C75 H135 N4 O19	13802	5	Positive	Cpd 2084: C75 H135 N4 O19; 31.084	1	1	1395.98	1396.99	31.084		30.903	0.175	6.49	4.65	77.9		Pass	0	Sample	LCMS QTOF	P2-F6	Msm lipids reserpine waterACN 03032023.m	LCMS_Anjana_ShK Lab.m	Success
1318	1	11414	Find by Formula	1023847	440.411	1	77.8	IML3 1.d	29.903	C44 H84 O11	36709	3	Positive	Cpd 1318: C44 H84 O11; 29.137	1	1	788.598	789.607	29.137		28.697	0.48	-3.22	-4.09	77.8		Pass	0	Sample	LCMS QTOF	P2-F6	Msm lipids reserpine waterACN 03032023.m	LCMS_Anjana_ShK Lab.m	Success
2495	1	17181	Find by Formula	1710317	440.411	1	77.31	IML3 1.d	29.986	C39 H74 N O8 P	44522	3	Positive	Cpd 2495: C39 H74 N O8 P; 29.586	1	1	715.514	716.525	29.586		28.372	0.938	-1.31	-1.84	77.31		Pass	0	Sample	LCMS QTOF	P2-F6	Msm lipids reserpine waterACN 03032023.m	LCMS_Anjana_ShK Lab.m	Success
1854	1	1464	Find by Formula	72523	282.279	1	74.29	IML3 1.d	30.518	C83 H138 N4 O26	5787	3	Positive	Cpd 1854: C83 H138 N4 O26; 30.302	1	1	1606.96	1607.97	30.302		30.152	0.248	4.09	2.55	74.29		Pass	0	Sample	LCMS QTOF	P2-F6	Msm lipids reserpine waterACN 03032023.m	LCMS_Anjana_ShK Lab.m	Success
1979	1	975	Find by Formula	29609	475.297	1	70.77	IML3 1.d	28.172	C79 H130 N4 O21	4230	5	Positive	Cpd 1979: C79 H130 N4 O21; 28.022	1	1	1470.93	1471.94	28.022		27.939	0.09	7.69	5.23	70.77		Pass	0	Sample	LCMS QTOF	P2-F6	Msm lipids reserpine waterACN 03032023.m	LCMS_Anjana_ShK Lab.m	Success
2021	1	111402	Find by Formula	3327562	282.279	1	91.59	IML3 1.d	30.984	C76 H126 N4 O20	355363	5	Positive	Cpd 2021: C76 H126 N4 O20; 30.535	1	1	1414.89	1415.9	30.535		30.352	0.142	-3.73	-2.64	91.59		Pass	0	Sample	LCMS QTOF	P2-F6	Msm lipids reserpine waterACN 03032023.m	LCMS_Anjana_ShK Lab.m	Success
2053	1	10135	Find by Formula	505875	282.279	1	80.22	IML3 1.d	30.585	C84 H142 N4 O24	47332	4	Positive	Cpd 2053: C84 H142 N4 O24; 30.252	1	1	1590.99	1592	30.252		30.119	0.163	-7.37	-4.63	80.22		Pass	0	Sample	LCMS QTOF	P2-F6	Msm lipids reserpine waterACN 03032023.m	LCMS_Anjana_ShK Lab.m	Success
1320	1	12143	Find by Formula	842188	254.249	1	96.69	IML3 1.d	28.155	C46 H88 O11	30795	5	Positive	Cpd 1320: C46 H88 O11; 28.022	1	1	816.632	817.64	28.022		26.491	0.096	-0.48	-0.58	96.69		Pass	0	Sample	LCMS QTOF	P2-F6	Msm lipids reserpine waterACN 03032023.m	LCMS_Anjana_ShK Lab.m	Success
378	1	6378	Find by Formula	85637	939.586	1	86.98	IML3 1.d	32.299	C51 H93 O18 P	19166	3	Positive	Cpd 378: C51 H93 O18 P; 32.199	1	1	1024.61	1025.62	32.199		32.132	0.074	-1.89	-1.85	86.98		Pass	0	Sample	LCMS QTOF	P2-F6	Msm lipids reserpine waterACN 03032023.m	LCMS_Anjana_ShK Lab.m	Success
1437	1	39466	Find by Formula	4607452	468.442	1	86.81	IML3 1.d	31.434	C39 H68 O6	181019	4	Positive	Cpd 1437: C39 H68 O6; 30.102	1	1	632.499	633.506	30.102		29.986	0.166	-2.92	-4.62	86.81		Pass	0	Sample	LCMS QTOF	P2-F6	Msm lipids reserpine waterACN 03032023.m	LCMS_Anjana_ShK Lab.m	Success
1438	1	3228	Find by Formula	94896	280.265	1	82.54	IML3 1.d	28.471	C39 H70 O6	3892	4	Positive	Cpd 1438: C39 H70 O6; 28.005	1	1	634.516	635.521	28.005		27.922	1.428	-0.82	-1.29	82.54		Pass	0	Sample	LCMS QTOF	P2-F6	Msm lipids reserpine waterACN 03032023.m	LCMS_Anjana_ShK Lab.m	Success
1377	1	3251	Find by Formula	82890	254.249	1	72.06	IML3 1.d	27.952	C39 H74 O5	10078	4	Positive	Cpd 1377: C39 H74 O5; 27.723	1	1	622.556	623.562	27.723		27.625	0.131	1.84	2.96	72.06		Pass	0	Sample	LCMS QTOF	P2-F6	Msm lipids reserpine waterACN 03032023.m	LCMS_Anjana_ShK Lab.m	Success
459	1	4651	Find by Formula	77579	691.467	1	88.86	IML3 1.d	24.527	C58 H105 O23 P	12206	3	Positive	Cpd 459: C58 H105 O23 P; 24.444	1	1	1200.68	1201.68	24.444		24.328	0.099	-2.42	-2.02	88.86		Pass	0	Sample	LCMS QTOF	P2-F6	Msm lipids reserpine waterACN 03032023.m	LCMS_Anjana_ShK Lab.m	Success
381	1	9151	Find by Formula	124160	939.585	1	88.41	IML3 1.d	32.282	C52 H95 O18 P	28350	4	Positive	Cpd 381: C52 H95 O18 P; 32.166	1	1	1038.62	1039.63	32.166		32.099	0.069	-2.9	-2.79	88.41		Pass	0	Sample	LCMS QTOF	P2-F6	Msm lipids reserpine waterACN 03032023.m	LCMS_Anjana_ShK Lab.m	Success
460	1	1855	Find by Formula	23224	884.595	1	85.29	IML3 1.d	24.294	C58 H109 O23 P	4415	3	Positive	Cpd 460: C58 H109 O23 P; 24.228	1	1	1204.71	1205.71	24.228		24.145	22.352	-2.14	-1.78	85.29		Pass	0	Sample	LCMS QTOF	P2-F6	Msm lipids reserpine waterACN 03032023.m	LCMS_Anjana_ShK Lab.m	Success
1907	1	8237	Find by Formula	1203233	468.442	1	83.95	IML3 1.d	32.648	C75 H128 N4 O17	31230	5	Positive	Cpd 1907: C75 H128 N4 O17; 31.667	1	1	1356.92	1357.93	31.667		30.618	0.561	-5.84	-4.3	83.95		Pass	0	Sample	LCMS QTOF	P2-F6	Msm lipids reserpine waterACN 03032023.m	LCMS_Anjana_ShK Lab.m	Success
1442	1	2527	Find by Formula	304970	663.455	1	77.97	IML3 1.d	35.827	C40 H74 O6	6926	3	Positive	Cpd 1442: C40 H74 O6; 35.544	1	1	650.548	651.554	35.544		34.479	6.688	-0.86	-1.33	77.97		Pass	0	Sample	LCMS QTOF	P2-F6	Msm lipids reserpine waterACN 03032023.m	LCMS_Anjana_ShK Lab.m	Success
1380	1	4836	Find by Formula	232422	280.264	1	82.91	IML3 1.d	28.954	C41 H76 O5	17577	3	Positive	Cpd 1380: C41 H76 O5; 28.355	1	1	648.571	649.577	28.355		28.272	0.156	1.2	1.85	82.91		Pass	0	Sample	LCMS QTOF	P2-F6	Msm lipids reserpine waterACN 03032023.m	LCMS_Anjana_ShK Lab.m	Success
2031	1	2754	Find by Formula	56282	440.268	1	77.59	IML3 1.d	22.497	C79 H130 N4 O20	9216	4	Positive	Cpd 2031: C79 H130 N4 O20; 22.381	1	1	1454.92	1455.93	22.381		22.297	0.107	-7.49	-5.15	77.59		Pass	0	Sample	LCMS QTOF	P2-F6	Msm lipids reserpine waterACN 03032023.m	LCMS_Anjana_ShK Lab.m	Success
2373	1	1967	Find by Formula	20819	270.315	1	71.65	IML3 1.d	30.202	C41 H81 O8 P	5167	3	Positive	Cpd 2373: C41 H81 O8 P; 30.136	1	1	732.564	733.568	30.136		30.052	0.06	-2.76	-3.76	71.65		Pass	0	Sample	LCMS QTOF	P2-F6	Msm lipids reserpine waterACN 03032023.m	LCMS_Anjana_ShK Lab.m	Success
1913	1	5553	Find by Formula	223667	1347.88	1	70.75	IML3 1.d	33.825	C76 H132 N4 O17	7600	3	Positive	Cpd 1913: C76 H132 N4 O17; 33.630	1	1	1372.96	1373.97	33.63		33.031	0.576	-0.73	-0.53	70.75		Pass	0	Sample	LCMS QTOF	P2-F6	Msm lipids reserpine waterACN 03032023.m	LCMS_Anjana_ShK Lab.m	Success
2034	1	736	Find by Formula	62100	440.411	1	78.87	IML3 1.d	29.62	C80 H130 N4 O20	4044	4	Positive	Cpd 2034: C80 H130 N4 O20; 29.353	1	1	1466.93	1467.93	29.353		29.021	0.163	-0.67	-0.45	78.87		Pass	0	Sample	LCMS QTOF	P2-F6	Msm lipids reserpine waterACN 03032023.m	LCMS_Anjana_ShK Lab.m	Success
900	1	6669	Find by Formula	120938	254.249	1	77.03	IML3 1.d	27.938	C51 H96 O13	13061	3	Positive	Cpd 900: C51 H96 O13; 27.723	1	1	916.688	917.695	27.723		27.645	0.164	3.27	3.56	77.03		Pass	0	Sample	LCMS QTOF	P2-F6	Msm lipids reserpine waterACN 03032023.m	LCMS_Anjana_ShK Lab.m	Success
1914	1	833	Find by Formula	18878	712.486	1	71.56	IML3 1.d	34.928	C77 H132 N4 O17	2271	3	Positive	Cpd 1914: C77 H132 N4 O17; 34.828	1	1	1384.95	1385.96	34.828		34.712	6.582	-4.52	-3.27	71.56		Pass	0	Sample	LCMS QTOF	P2-F6	Msm lipids reserpine waterACN 03032023.m	LCMS_Anjana_ShK Lab.m	Success
1448	1	6779	Find by Formula	1087582	764.575	1	81.52	IML3 1.d	35.76	C43 H76 O6	20652	4	Positive	Cpd 1448: C43 H76 O6; 33.863	1	1	688.561	689.568	33.863		33.564	0.86	-3.18	-4.62	81.52		Pass	0	Sample	LCMS QTOF	P2-F6	Msm lipids reserpine waterACN 03032023.m	LCMS_Anjana_ShK Lab.m	Success
969	1	2877	Find by Formula	115872	468.442	1	71.17	IML3 1.d	31.713	C53 H94 O14	7308	3	Positive	Cpd 969: C53 H94 O14; 31.234	1	1	954.665	955.67	31.234		31.12	0.306	0.53	0.56	71.17		Pass	0	Sample	LCMS QTOF	P2-F6	Msm lipids reserpine waterACN 03032023.m	LCMS_Anjana_ShK Lab.m	Success
2653	1	3884	Find by Formula	139369	468.442	1	72.4	IML3 1.d	31.6	C49 H95 O10 P	17815	3	Positive	Cpd 2653: C49 H95 O10 P; 31.217	1	1	874.671	875.68	31.217		31.117	0.095	4.99	5.7	72.4		Pass	0	Sample	LCMS QTOF	P2-F6	Msm lipids reserpine waterACN 03032023.m	LCMS_Anjana_ShK Lab.m	Success
2179	1	5934	Find by Formula	344807	663.455	1	76.09	IML3 1.d	35.86	C69 H127 O10	22720	3	Positive	Cpd 2179: C69 H127 O10; 35.494	1	1	1115.94	1116.95	35.494		35.211	0.22	0.57	0.51	76.09		Pass	0	Sample	LCMS QTOF	P2-F6	Msm lipids reserpine waterACN 03032023.m	LCMS_Anjana_ShK Lab.m	Success
914	1	1477	Find by Formula	27380	242.247	1	81.46	IML3 1.d	28.322	C57 H106 O13	4176	3	Positive	Cpd 914: C57 H106 O13; 28.222	1	1	998.767	999.774	28.222		28.105	0.102	3.8	3.81	81.46		Pass	0	Sample	LCMS QTOF	P2-F6	Msm lipids reserpine waterACN 03032023.m	LCMS_Anjana_ShK Lab.m	Success
463	1	20777	Find by Formula	570095	282.279	1	87.87	IML3 1.d	30.951	C67 H123 O24 P	61313	4	Positive	Cpd 463: C67 H123 O24 P; 30.685	1	1	1342.81	1343.82	30.685		30.486	0.14	-3.74	-2.79	87.87		Pass	0	Sample	LCMS QTOF	P2-F6	Msm lipids reserpine waterACN 03032023.m	LCMS_Anjana_ShK Lab.m	Success
2981	1	10158	Find by Formula	555299	537.395	1	83.3	IML3 1.d	33.181	C58 H110 O17 S	21400	4	Positive	Cpd 2981: C58 H110 O17 S; 32.831	1	1	1110.75	1111.76	32.831		32.432	0.447	2.97	2.68	83.3		Pass	0	Sample	LCMS QTOF	P2-F6	Msm lipids reserpine waterACN 03032023.m	LCMS_Anjana_ShK Lab.m	Success
385	1	11350	Find by Formula	452127	270.316	1	77.82	IML3 1.d	30.534	C61 H111 O19 P	31403	4	Positive	Cpd 385: C61 H111 O19 P; 30.136	1	1	1178.75	1180.76	30.136		29.936	0.194	0.93	0.79	77.82		Pass	0	Sample	LCMS QTOF	P2-F6	Msm lipids reserpine waterACN 03032023.m	LCMS_Anjana_ShK Lab.m	Success
2812	1	58425	Find by Formula	385090	475.297	1	70.39	IML3 1.d	28.117	C55 H107 O13 P	64773	3	Positive	Cpd 2812: C55 H107 O13 P; 28.022	1	1	1006.74	1007.75	28.022		27.906	0.093	-0.47	-0.47	70.39		Pass	0	Sample	LCMS QTOF	P2-F6	Msm lipids reserpine waterACN 03032023.m	LCMS_Anjana_ShK Lab.m	Success
2523	1	3851	Find by Formula	88201	468.442	1	71.77	IML3 1.d	31.384	C52 H100 N O8 P	10999	3	Positive	Cpd 2523: C52 H100 N O8 P; 31.217	1	1	897.717	898.722	31.217		31.117	0.111	-1.78	-1.99	71.77		Pass	0	Sample	LCMS QTOF	P2-F6	Msm lipids reserpine waterACN 03032023.m	LCMS_Anjana_ShK Lab.m	Success
2816	1	14596	Find by Formula	80599	280.265	1	76.47	IML3 1.d	28.539	C57 H107 O13 P	12706	5	Positive	Cpd 2816: C57 H107 O13 P; 28.421	1	1	1030.75	1031.76	28.421		28.322	0.096	4.43	4.3	76.47		Pass	0	Sample	LCMS QTOF	P2-F6	Msm lipids reserpine waterACN 03032023.m	LCMS_Anjana_ShK Lab.m	Success
392	1	26276	Find by Formula	1797889	440.411	1	74.6	IML3 1.d	30.269	C63 H115 O19 P	68723	4	Positive	Cpd 392: C63 H115 O19 P; 29.487	1	1	1206.78	1207.79	29.487		29.237	0.45	6.92	5.74	74.6		Pass	0	Sample	LCMS QTOF	P2-F6	Msm lipids reserpine waterACN 03032023.m	LCMS_Anjana_ShK Lab.m	Success
553	1	3240	Find by Formula	163033	282.279	1	81.66	IML3 1.d	30.601	C77 H143 O29 P	12400	4	Positive	Cpd 553: C77 H143 O29 P; 30.435	1	1	1562.94	1563.95	30.435		30.202	0.226	-5.96	-3.81	81.66		Pass	0	Sample	LCMS QTOF	P2-F6	Msm lipids reserpine waterACN 03032023.m	LCMS_Anjana_ShK Lab.m	Success
398	1	32086	Find by Formula	2220051	270.316	1	81.57	IML3 1.d	30.002	C65 H113 O19 P	81854	4	Positive	Cpd 398: C65 H113 O19 P; 29.487	1	1	1228.77	1229.77	29.487		29.254	0.573	5.85	4.76	81.57		Pass	0	Sample	LCMS QTOF	P2-F6	Msm lipids reserpine waterACN 03032023.m	LCMS_Anjana_ShK Lab.m	Success
551	1	998	Find by Formula	20093	254.247	1	77.26	IML3 1.d	28.238	C77 H133 O29 P	3736	3	Positive	Cpd 551: C77 H133 O29 P; 28.122	1	1	1552.86	1553.87	28.122		28.072	0.099	-2.21	-1.42	77.26		Pass	0	Sample	LCMS QTOF	P2-F6	Msm lipids reserpine waterACN 03032023.m	LCMS_Anjana_ShK Lab.m	Success
474	1	4175	Find by Formula	142527	280.264	1	72.98	IML3 1.d	28.971	C71 H131 O24 P	5872	5	Positive	Cpd 474: C71 H131 O24 P; 28.921	1	1	1398.88	1400.89	28.921		28.255	0.56	2.87	2.05	72.98		Pass	0	Sample	LCMS QTOF	P2-F6	Msm lipids reserpine waterACN 03032023.m	LCMS_Anjana_ShK Lab.m	Success
1470	1	1614	Find by Formula	108558	282.279	1	72.85	IML3 1.d	31.167	C53 H96 O6	4325	3	Positive	Cpd 1470: C53 H96 O6; 31.001	1	1	828.725	829.733	31.001		30.385	2.039	4.5	5.43	72.85		Pass	0	Sample	LCMS QTOF	P2-F6	Msm lipids reserpine waterACN 03032023.m	LCMS_Anjana_ShK Lab.m	Success
401	1	88140	Find by Formula	2541164	280.263	1	71.59	IML3 1.d	29.037	C65 H119 O19 P	122258	5	Positive	Cpd 401: C65 H119 O19 P; 28.921	1	1	1234.82	1235.82	28.921		28.571	0.441	8.19	6.63	71.59		Pass	0	Sample	LCMS QTOF	P2-F6	Msm lipids reserpine waterACN 03032023.m	LCMS_Anjana_ShK Lab.m	Success
402	1	19205	Find by Formula	229680	254.247	1	71.31	IML3 1.d	28.139	C65 H121 O19 P	29509	3	Positive	Cpd 402: C65 H121 O19 P; 28.005	1	1	1236.82	1237.83	28.005		27.822	0.104	-0.96	-0.77	71.31		Pass	0	Sample	LCMS QTOF	P2-F6	Msm lipids reserpine waterACN 03032023.m	LCMS_Anjana_ShK Lab.m	Success
404	1	5535	Find by Formula	388293	537.395	1	76.94	IML3 1.d	33.514	C66 H115 O19 P	15093	4	Positive	Cpd 404: C66 H115 O19 P; 33.014	1	1	1242.78	1243.79	33.014		32.532	0.358	5.88	4.73	76.94		Pass	0	Sample	LCMS QTOF	P2-F6	Msm lipids reserpine waterACN 03032023.m	LCMS_Anjana_ShK Lab.m	Success
407	1	82312	Find by Formula	4097168	282.279	1	70.6	IML3 1.d	31.067	C66 H121 O19 P	279919	5	Positive	Cpd 407: C66 H121 O19 P; 30.319	1	1	1248.83	1249.84	30.319		30.252	0.185	8.25	6.61	70.6		Pass	0	Sample	LCMS QTOF	P2-F6	Msm lipids reserpine waterACN 03032023.m	LCMS_Anjana_ShK Lab.m	Success
408	1	22907	Find by Formula	2475230	663.455	1	70.02	IML3 1.d	35.943	C66 H123 O19 P	85137	3	Positive	Cpd 408: C66 H123 O19 P; 35.677	1	1	1250.84	1251.85	35.677		34.346	0.2	-1.08	-0.86	70.02		Pass	0	Sample	LCMS QTOF	P2-F6	Msm lipids reserpine waterACN 03032023.m	LCMS_Anjana_ShK Lab.m	Success
410	1	70519	Find by Formula	998094	270.315	1	79.39	IML3 1.d	30.265	C67 H117 O19 P	148637	4	Positive	Cpd 410: C67 H117 O19 P; 30.102	1	1	1256.8	1257.81	30.102		30.016	0.107	6.25	4.97	79.39		Pass	0	Sample	LCMS QTOF	P2-F6	Msm lipids reserpine waterACN 03032023.m	LCMS_Anjana_ShK Lab.m	Success
1072	1	10107	Find by Formula	170657	473.318	1	70.65	IML3 1.d	32.016	C61 H112 O17 P2	28231	4	Positive	Cpd 1072: C61 H112 O17 P2; 31.883	1	1	1178.73	1179.74	31.883		31.766	0.092	-8.21	-6.97	70.65		Pass	0	Sample	LCMS QTOF	P2-F6	Msm lipids reserpine waterACN 03032023.m	LCMS_Anjana_ShK Lab.m	Success
415	1	65376	Find by Formula	3923184	270.316	1	85.48	IML3 1.d	29.952	C68 H119 O19 P	157352	4	Positive	Cpd 415: C68 H119 O19 P; 29.769	1	1	1270.81	1271.82	29.769		29.254	0.484	5.17	4.07	85.48		Pass	0	Sample	LCMS QTOF	P2-F6	Msm lipids reserpine waterACN 03032023.m	LCMS_Anjana_ShK Lab.m	Success
416	1	32082	Find by Formula	608759	764.575	1	82.35	IML3 1.d	33.989	C68 H121 O19 P	80896	3	Positive	Cpd 416: C68 H121 O19 P; 33.713	1	1	1272.82	1273.83	33.713		33.586	0.11	-1.62	-1.28	82.35		Pass	0	Sample	LCMS QTOF	P2-F6	Msm lipids reserpine waterACN 03032023.m	LCMS_Anjana_ShK Lab.m	Success
1077	1	260008	Find by Formula	6557211	764.574	1	80.61	IML3 1.d	31.467	C62 H116 O17 P2	754419	4	Positive	Cpd 1077: C62 H116 O17 P2; 30.868	1	1	1194.76	1195.77	30.868		30.735	0.129	-5.93	-4.96	80.61		Pass	0	Sample	LCMS QTOF	P2-F6	Msm lipids reserpine waterACN 03032023.m	LCMS_Anjana_ShK Lab.m	Success
417	1	23015	Find by Formula	238143	270.315	1	79.82	IML3 1.d	30.384	C68 H123 O19 P	25142	3	Positive	Cpd 417: C68 H123 O19 P; 30.169	1	1	1274.84	1275.84	30.169		30.028	0.167	0.16	0.13	79.82		Pass	0	Sample	LCMS QTOF	P2-F6	Msm lipids reserpine waterACN 03032023.m	LCMS_Anjana_ShK Lab.m	Success
418	1	5895	Find by Formula	109617	764.575	1	77.85	IML3 1.d	34.812	C68 H125 O19 P	7314	3	Positive	Cpd 418: C68 H125 O19 P; 34.595	1	1	1276.86	1277.86	34.595		34.313	0.244	1.71	1.34	77.85		Pass	0	Sample	LCMS QTOF	P2-F6	Msm lipids reserpine waterACN 03032023.m	LCMS_Anjana_ShK Lab.m	Success
423	1	12572	Find by Formula	74391	663.455	1	82.42	IML3 1.d	35.727	C69 H125 O19 P	15813	3	Positive	Cpd 423: C69 H125 O19 P; 35.660	1	1	1288.86	1289.86	35.66		35.544	0.073	2.97	2.3	82.42		Pass	0	Sample	LCMS QTOF	P2-F6	Msm lipids reserpine waterACN 03032023.m	LCMS_Anjana_ShK Lab.m	Success
424	1	3477	Find by Formula	359845	663.455	1	74.3	IML3 1.d	35.87	C69 H127 O19 P	7629	3	Positive	Cpd 424: C69 H127 O19 P; 35.660	1	1	1290.87	1291.87	35.66		34.362	1.24	-4.03	-3.12	74.3		Pass	0	Sample	LCMS QTOF	P2-F6	Msm lipids reserpine waterACN 03032023.m	LCMS_Anjana_ShK Lab.m	Success
421	1	46238	Find by Formula	3667499	663.455	1	72.5	IML3 1.d	35.96	C69 H121 O19 P	188696	4	Positive	Cpd 421: C69 H121 O19 P; 35.677	1	1	1284.83	1285.84	35.677		34.928	0.243	6.07	4.73	72.5		Pass	0	Sample	LCMS QTOF	P2-F6	Msm lipids reserpine waterACN 03032023.m	LCMS_Anjana_ShK Lab.m	Success
427	1	14412	Find by Formula	396190	764.575	1	77.56	IML3 1.d	35.311	C70 H123 O19 P	15113	4	Positive	Cpd 427: C70 H123 O19 P; 34.612	1	1	1298.84	1299.85	34.612		34.253	0.37	-0.16	-0.13	77.56		Pass	0	Sample	LCMS QTOF	P2-F6	Msm lipids reserpine waterACN 03032023.m	LCMS_Anjana_ShK Lab.m	Success
1085	1	1776	Find by Formula	34417	285.17	1	71.9	IML3 1.d	25.426	C64 H120 O17 P2	5243	3	Positive	Cpd 1085: C64 H120 O17 P2; 25.293	1	1	1222.8	1224.81	25.293		25.243	0.12	0.39	0.32	71.9		Pass	0	Sample	LCMS QTOF	P2-F6	Msm lipids reserpine waterACN 03032023.m	LCMS_Anjana_ShK Lab.m	Success
438	1	3471	Find by Formula	226332	537.395	1	97.49	IML3 1.d	32.898	C72 H135 O19 P	9162	4	Positive	Cpd 438: C72 H135 O19 P; 32.582	1	1	1334.93	1335.94	32.582		32.035	0.402	1	0.75	97.49		Pass	0	Sample	LCMS QTOF	P2-F6	Msm lipids reserpine waterACN 03032023.m	LCMS_Anjana_ShK Lab.m	Success
1101	1	195696	Find by Formula	4165769	1234.84	1	71.14	IML3 1.d	31.101	C68 H128 O17 P2	481311	3	Positive	Cpd 1101: C68 H128 O17 P2; 30.751	1	1	1278.86	1279.87	30.751		30.586	0.13	-0.02	-0.01	71.14		Pass	0	Sample	LCMS QTOF	P2-F6	Msm lipids reserpine waterACN 03032023.m	LCMS_Anjana_ShK Lab.m	Success
2840	1	4275	Find by Formula	348009	537.395	1	93.24	IML3 1.d	33.181	C69 H135 O13 P	11177	4	Positive	Cpd 2840: C69 H135 O13 P; 32.648	1	1	1202.97	1203.97	32.648		32.399	0.555	1.83	1.52	93.24		Pass	0	Sample	LCMS QTOF	P2-F6	Msm lipids reserpine waterACN 03032023.m	LCMS_Anjana_ShK Lab.m	Success
1105	1	3477	Find by Formula	369495	663.455	1	73.56	IML3 1.d	35.871	C69 H128 O17 P2	7716	3	Positive	Cpd 1105: C69 H128 O17 P2; 35.660	1	1	1290.87	1291.87	35.66		34.362	1.245	4.21	3.26	73.56		Pass	0	Sample	LCMS QTOF	P2-F6	Msm lipids reserpine waterACN 03032023.m	LCMS_Anjana_ShK Lab.m	Success
2420	1	2538	Find by Formula	50909	413.266	1	82.85	IML3 1.d	31.983	C64 H125 O8 P	7167	3	Positive	Cpd 2420: C64 H125 O8 P; 31.866	1	1	1052.91	1053.92	31.866		31.733	0.101	0.51	0.48	82.85		Pass	0	Sample	LCMS QTOF	P2-F6	Msm lipids reserpine waterACN 03032023.m	LCMS_Anjana_ShK Lab.m	Success
293	1	7292	Find by Formula	119329	1234.84	1	71.32	IML3 1.d	30.918	C70 H132 O17 P2	15115	3	Positive	Cpd 293: C70 H132 O17 P2; 30.751	1	1	1306.89	1307.9	30.751		30.651	0.132	-2.66	-2.03	71.32		Pass	0	Sample	LCMS QTOF	P2-F6	Msm lipids reserpine waterACN 03032023.m	LCMS_Anjana_ShK Lab.m	Success
2422	1	1433	Find by Formula	14450	413.266	1	78.41	IML3 1.d	31.9	C65 H127 O8 P	2906	4	Positive	Cpd 2422: C65 H127 O8 P; 31.866	1	1	1066.93	1067.93	31.866		31.756	1.606	-1.49	-1.4	78.41		Pass	0	Sample	LCMS QTOF	P2-F6	Msm lipids reserpine waterACN 03032023.m	LCMS_Anjana_ShK Lab.m	Success
2705	1	1470	Find by Formula	121580	438.504	1	72.77	IML3 1.d	35.727	C68 H135 O10 P	3305	3	Positive	Cpd 2705: C68 H135 O10 P; 35.211	1	1	1142.98	1144	35.211		34.878	2.002	3.41	2.99	72.77		Pass	0	Sample	LCMS QTOF	P2-F6	Msm lipids reserpine waterACN 03032023.m	LCMS_Anjana_ShK Lab.m	Success
305	1	3832	Find by Formula	422230	663.455	1	76.42	IML3 1.d	35.87	C73 H140 O17 P2	13739	4	Positive	Cpd 305: C73 H140 O17 P2; 35.744	1	1	1350.96	1351.96	35.744		34.412	0.527	-1.21	-0.9	76.42		Pass	0	Sample	LCMS QTOF	P2-F6	Msm lipids reserpine waterACN 03032023.m	LCMS_Anjana_ShK Lab.m	Success
1121	1	4501	Find by Formula	121721	270.316	1	70.46	IML3 1.d	30.185	C73 H136 O17 P2	10099	3	Positive	Cpd 1121: C73 H136 O17 P2; 30.019	1	1	1346.93	1347.94	30.019		29.819	0.201	3.79	2.81	70.46		Pass	0	Sample	LCMS QTOF	P2-F6	Msm lipids reserpine waterACN 03032023.m	LCMS_Anjana_ShK Lab.m	Success
1266	1	2574	Find by Formula	577048	440.269	1	74.6	IML3 1.d	22.913	C72 H140 O8	6980	3	Positive	Cpd 1266: C72 H140 O8; 20.733	1	1	1133.05	1134.06	20.733		20.683	1.928	-0.28	-0.25	74.6		Pass	0	Sample	LCMS QTOF	P2-F6	Msm lipids reserpine waterACN 03032023.m	LCMS_Anjana_ShK Lab.m	Success
2899	1	1070	Find by Formula	180160	270.316	1	71.15	IML3 1.d	30.568	C94 H175 O30 P	6182	3	Positive	Cpd 2899: C94 H175 O30 P; 30.036	1	1	1815.19	1817.2	30.036		29.287	0.244	-1.2	-0.66	71.15		Pass	0	Sample	LCMS QTOF	P2-F6	Msm lipids reserpine waterACN 03032023.m	LCMS_Anjana_ShK Lab.m	Success
3008	1	14560	Find by Formula	595756	242.284	1	71.77	IML3 1.d	26.622	C82 H156 O19 S	39910	3	Positive	Cpd 3008: C82 H156 O19 S; 26.058	1	1	1477.1	1478.1	26.058		25.943	0.245	-0.72	-0.49	71.77		Pass	0	Sample	LCMS QTOF	P2-F6	Msm lipids reserpine waterACN 03032023.m	LCMS_Anjana_ShK Lab.m	Success
3013	1	7959	Find by Formula	339038	242.284	1	72.77	IML3 1.d	26.441	C84 H158 O19 S	24328	3	Positive	Cpd 3013: C84 H158 O19 S; 26.092	1	1	1503.11	1504.12	26.092		25.925	0.222	-1.1	-0.73	72.77		Pass	0	Sample	LCMS QTOF	P2-F6	Msm lipids reserpine waterACN 03032023.m	LCMS_Anjana_ShK Lab.m	Success
3014	1	5228	Find by Formula	199710	280.265	1	70.9	IML3 1.d	28.538	C84 H160 O19 S	19019	3	Positive	Cpd 3014: C84 H160 O19 S; 28.305	1	1	1505.13	1506.13	28.305		28.089	0.155	-1.84	-1.22	70.9		Pass	0	Sample	LCMS QTOF	P2-F6	Msm lipids reserpine waterACN 03032023.m	LCMS_Anjana_ShK Lab.m	Success
3015	1	5621	Find by Formula	217699	242.284	1	71.85	IML3 1.d	26.441	C85 H160 O19 S	16852	3	Positive	Cpd 3015: C85 H160 O19 S; 26.075	1	1	1517.13	1518.13	26.075		25.959	0.2	-1.65	-1.08	71.85		Pass	0	Sample	LCMS QTOF	P2-F6	Msm lipids reserpine waterACN 03032023.m	LCMS_Anjana_ShK Lab.m	Success
1146	1	14560	Find by Formula	595756	242.284	1	70.45	IML3 1.d	26.622	C82 H158 O17 P2	39910	3	Positive	Cpd 1146: C82 H158 O17 P2; 26.058	1	1	1477.1	1478.1	26.058		25.943	0.245	-2.11	-1.43	70.45		Pass	0	Sample	LCMS QTOF	P2-F6	Msm lipids reserpine waterACN 03032023.m	LCMS_Anjana_ShK Lab.m	Success
3018	1	4507	Find by Formula	236179	270.316	1	86.48	IML3 1.d	30.25	C86 H162 O19 S	22470	4	Positive	Cpd 3018: C86 H162 O19 S; 30.052	1	1	1531.14	1532.15	30.052		29.787	0.143	-0.44	-0.29	86.48		Pass	0	Sample	LCMS QTOF	P2-F6	Msm lipids reserpine waterACN 03032023.m	LCMS_Anjana_ShK Lab.m	Success
1154	1	7959	Find by Formula	339038	242.284	1	72.1	IML3 1.d	26.441	C84 H160 O17 P2	24328	3	Positive	Cpd 1154: C84 H160 O17 P2; 26.092	1	1	1503.11	1504.12	26.092		25.925	0.222	-2.5	-1.66	72.1		Pass	0	Sample	LCMS QTOF	P2-F6	Msm lipids reserpine waterACN 03032023.m	LCMS_Anjana_ShK Lab.m	Success
3020	1	25058	Find by Formula	980060	270.316	1	71.57	IML3 1.d	30.352	C87 H164 O19 S	95046	3	Positive	Cpd 3020: C87 H164 O19 S; 30.052	1	1	1545.16	1546.17	30.052		29.772	0.152	-1.32	-0.85	71.57		Pass	0	Sample	LCMS QTOF	P2-F6	Msm lipids reserpine waterACN 03032023.m	LCMS_Anjana_ShK Lab.m	Success
339	1	170970	Find by Formula	6134289	270.317	1	70.57	IML3 1.d	30.369	C85 H164 O17 P2	650756	3	Positive	Cpd 339: C85 H164 O17 P2; 30.052	1	1	1519.15	1520.15	30.052		29.754	0.103	0.87	0.57	70.57		Pass	0	Sample	LCMS QTOF	P2-F6	Msm lipids reserpine waterACN 03032023.m	LCMS_Anjana_ShK Lab.m	Success
1158	1	5621	Find by Formula	217699	242.284	1	70.24	IML3 1.d	26.441	C85 H162 O17 P2	16852	3	Positive	Cpd 1158: C85 H162 O17 P2; 26.075	1	1	1517.13	1518.13	26.075		25.959	0.2	-3.04	-2	70.24		Pass	0	Sample	LCMS QTOF	P2-F6	Msm lipids reserpine waterACN 03032023.m	LCMS_Anjana_ShK Lab.m	Success
1161	1	4507	Find by Formula	236179	270.316	1	78.61	IML3 1.d	30.25	C86 H164 O17 P2	22470	3	Positive	Cpd 1161: C86 H164 O17 P2; 30.052	1	1	1531.14	1532.15	30.052		29.787	0.143	-1.6	-1.05	78.61		Pass	0	Sample	LCMS QTOF	P2-F6	Msm lipids reserpine waterACN 03032023.m	LCMS_Anjana_ShK Lab.m	Success
1163	1	25058	Find by Formula	979263	270.316	1	70.87	IML3 1.d	30.352	C87 H166 O17 P2	95046	4	Positive	Cpd 1163: C87 H166 O17 P2; 30.052	1	1	1545.16	1546.17	30.052		29.772	0.152	-2.86	-1.85	70.87		Pass	0	Sample	LCMS QTOF	P2-F6	Msm lipids reserpine waterACN 03032023.m	LCMS_Anjana_ShK Lab.m	Success
Classification of detected compounds depending on the lipid subclasses
		copied from the MassHunter - Find by Fromula analysis						SI (eq. 05)	SI (eq. 06)		mol% of lipid subclasses	Lipid subclass
formula	compound name	mass	m/z	RT	score	unsaturation	area	ppm	molarity	mol%
C61H111O19P	Ac1PIM1 (R1CO2H+R2CO2H+R3CO2H=46:2)	1178.75	1180.76	30.136	77.82	2	452127	0.0125547	1.06509e-08	0.0835711
C63H115O19P	Ac1PIM1 (R1CO2H+R2CO2H+R3CO2H=48:2)	1206.78	1207.79	29.487	74.6	2	1797889	0.0499238	4.13693e-08	0.324601
C65H121O19P	Ac1PIM1 (R1CO2H+R2CO2H+R3CO2H=50:1)	1236.82	1237.83	28.005	71.31	1	229680	0.00637775	5.15656e-09	0.0404606
C65H119O19P	Ac1PIM1 (R1CO2H+R2CO2H+R3CO2H=50:2)	1234.82	1235.82	28.921	71.59	2	2541164	0.070563	5.71445e-08	0.44838
C65H113O19P	Ac1PIM1 (R1CO2H+R2CO2H+R3CO2H=50:5)	1228.77	1229.77	29.487	81.57	5	2220051	0.0616463	5.01693e-08	0.393649
C66H123O19P	Ac1PIM1 (R1CO2H+R2CO2H+R3CO2H=51:1)	1250.84	1251.85	35.677	70.02	1	2475230	0.0687321	5.49489e-08	0.431152
C66H121O19P	Ac1PIM1 (R1CO2H+R2CO2H+R3CO2H=51:2)	1248.83	1249.84	30.319	70.6	2	4097168	0.11377	9.11012e-08	0.714819
C66H115O19P	Ac1PIM1 (R1CO2H+R2CO2H+R3CO2H=51:5)	1242.78	1243.79	33.014	76.94	5	388293	0.0107821	8.67578e-09	0.0680739
C67H117O19P	Ac1PIM1 (R1CO2H+R2CO2H+R3CO2H=52:5)	1256.8	1257.81	30.102	79.39	5	998094	0.0277151	2.20521e-08	0.17303
C68H125O19P	Ac1PIM1 (R1CO2H+R2CO2H+R3CO2H=53:2)	1276.86	1277.86	34.595	77.85	2	109617	0.00304384	2.38386e-09	0.0187047
C68H123O19P	Ac1PIM1 (R1CO2H+R2CO2H+R3CO2H=53:3)	1274.84	1275.84	30.169	79.82	3	238143	0.00661275	5.18712e-09	0.0407004
C68H121O19P	Ac1PIM1 (R1CO2H+R2CO2H+R3CO2H=53:4)	1272.82	1273.83	33.713	82.35	4	608759	0.016904	1.32807e-08	0.104206
C68H119O19P	Ac1PIM1 (R1CO2H+R2CO2H+R3CO2H=53:5)	1270.81	1271.82	29.769	85.48	5	3923184	0.108939	8.57238e-08	0.672625
C69H127O19P	Ac1PIM1 (R1CO2H+R2CO2H+R3CO2H=54:2)	1290.87	1291.87	35.66	74.3	2	359845	0.00999217	7.74067e-09	0.0607366
C69H125O19P	Ac1PIM1 (R1CO2H+R2CO2H+R3CO2H=54:3)	1288.86	1289.86	35.66	82.42	3	74391	0.00206569	1.60273e-09	0.0125757
C69H121O19P	Ac1PIM1 (R1CO2H+R2CO2H+R3CO2H=54:5)	1284.83	1285.84	35.677	72.5	5	3667499	0.101839	7.92627e-08	0.621929
C70H123O19P	Ac1PIM1 (R1CO2H+R2CO2H+R3CO2H=55:5)	1298.84	1299.85	34.612	77.56	5	396190	0.0110014	8.47017e-09	0.0664606
C72H135O19P	Ac1PIM1 (R1CO2H+R2CO2H+R3CO2H=57:1)	1334.93	1335.94	32.582	97.49	1	226332	0.00628478	4.70793e-09	0.0369405	4.31262	Ac1PIM1
C67H123O24P	Ac1PIM2 (R1CO2H+R2CO2H+R3CO2H=46:1,R4=H)	1342.81	1343.82	30.685	87.87	1	570095	0.0158304	1.1789e-08	0.0925015
C71H131O24P	Ac1PIM2 (R1CO2H+R2CO2H+R3CO2H=50:1,R4=H)	1398.88	1400.89	28.921	72.98	1	142527	0.00395769	2.82918e-09	0.022199	0.1147	Ac1PIM2
C77H143O29P	Ac1PIM3 (R1CO2H+R2CO2H+R3CO2H=50:0,R4=H)	1562.94	1563.95	30.435	81.66	0	163033	0.0045271	2.89653e-09	0.0227274
C77H133O29P	Ac1PIM3 (R1CO2H+R2CO2H+R3CO2H=50:5,R4=H)	1552.86	1553.87	28.122	77.26	5	20093	0.000557942	3.59299e-10	0.00281921	0.0255466	Ac1PIM3
C94H175O30P	Ac2PIM3 (R1CO2H+R2CO2H+R3CO2H+R4CO2H=67:0)	1815.19	1817.2	30.036	71.15	0	180160	0.00500268	2.75601e-09	0.0216248	0.0216248	Ac2PIM3
C58H110O17S	Ac2SGL (C58)	1110.75	1111.76	32.831	83.3	0	555299	0.0154195	1.38821e-08	0.108925	0.108925	Ac2SGL
C86H162O19S	Ac3SGL	1531.14	1532.15	30.052	86.48	0	236179	0.00655821	4.28322e-09	0.0336079
C84H158O19S	Ac3SGL	1503.11	1504.12	26.092	72.77	0	339038	0.0094144	6.26328e-09	0.0491444
C85H160O19S	Ac3SGL	1517.13	1518.13	26.075	71.85	0	217699	0.00604506	3.98455e-09	0.0312645
C82H156O19S	Ac3SGL	1477.1	1478.1	26.058	71.77	0	595756	0.0165429	1.11996e-08	0.0878772
C87H164O19S	Ac3SGL	1545.16	1546.17	30.052	71.57	0	980060	0.0272143	1.76126e-08	0.138196
C84H160O19S	Ac3SGL	1505.13	1506.13	28.305	70.9	0	199710	0.00554554	3.68444e-09	0.0289097	0.369	Ac3SGL
C62H116O17P2	CL	1194.76	1195.77	30.868	80.61	2	6557211	0.182081	1.52399e-07	1.19579
C64H120O17P2	CL	1222.8	1224.81	25.293	71.9	2	34417	0.000955691	7.81559e-10	0.00613244
C61H112O17P2	CL	1178.73	1179.74	31.883	70.65	3	170657	0.0047388	4.02026e-09	0.0315447
C68H128O17P2	CL (2R1CO2H+2R2CO2H=59:2)	1278.86	1279.87	30.751	71.14	2	4165769	0.115675	9.04515e-08	0.709721
C69H128O17P2	CL (2R1CO2H+2R2CO2H=60:3)	1290.87	1291.87	35.66	73.56	3	369495	0.0102601	7.94825e-09	0.0623653
C70H132O17P2	CL (2R1CO2H+2R2CO2H=61:2)	1306.89	1307.9	30.751	71.32	2	119329	0.00331353	2.53543e-09	0.019894
C73H140O17P2	CL (2R1CO2H+2R2CO2H=64:1)	1350.96	1351.96	35.744	76.42	1	422230	0.0117245	8.67865e-09	0.0680964
C73H136O17P2	CL (2R1CO2H+2R2CO2H=64:3)	1346.93	1347.94	30.019	70.46	3	121721	0.00337995	2.50937e-09	0.0196896
C82H158O17P2	CL (2R1CO2H+2R2CO2H=73:1)	1477.1	1478.1	26.058	70.45	1	595756	0.0165429	1.11996e-08	0.0878772
C84H160O17P2	CL (2R1CO2H+2R2CO2H=75:2)	1503.11	1504.12	26.092	72.1	2	339038	0.0094144	6.26328e-09	0.0491444
C85H164O17P2	CL (2R1CO2H+2R2CO2H=76:1)	1519.15	1520.15	30.052	70.57	1	6134289	0.170337	1.12127e-07	0.879794
C85H162O17P2	CL (2R1CO2H+2R2CO2H=76:2)	1517.13	1518.13	26.075	70.24	2	217699	0.00604506	3.98455e-09	0.0312645
C86H164O17P2	CL (2R1CO2H+2R2CO2H=77:2)	1531.14	1532.15	30.052	78.61	2	236179	0.00655821	4.28322e-09	0.0336079
C87H166O17P2	CL (2R1CO2H+2R2CO2H=78:2)	1545.16	1546.17	30.052	70.87	2	979263	0.0271922	1.75983e-08	0.138084	3.333	CL
C38H70O13	DAT	734.484	735.491	24.411	91.69	0	99036832	2.75005	3.7442e-06	29.3786
C40H70O13	DAT	758.481	759.489	22.014	88.8	2	45447	0.00126197	1.66381e-09	0.013055
C36H64O13	DAT	704.436	705.442	24.328	88.67	1	131180	0.0036426	5.17095e-09	0.0405735
C57H106O13	DAT	998.767	999.774	28.222	81.46	1	27380	0.000760287	7.61226e-10	0.0059729
C37H68O13	DAT	720.465	721.471	23.645	80.04	0	181048	0.00502734	6.97791e-09	0.0547517
C51H96O13	DAT	916.688	917.695	27.723	77.03	0	120938	0.0033582	3.66341e-09	0.0287447
C43H80O13	DAT	804.563	805.572	35.594	76.2	0	493031	0.0136905	1.7016e-08	0.133515	29.6552	DAT
C38H55N5O10	Ddcarboxymycobactins	741.401	742.408	29.07	70.81	1	8579181	0.238227	3.2132e-07	2.52121
C46H73N5O8	Ddmycobactins	823.547	824.554	30.202	87.66	1	1129536	0.0313649	3.80852e-08	0.298833	2.82004	mycobactin
C36H66O5	DG (R1CO2H+R2CO2H=33:2)	578.489	579.496	34.063	85.85	2	175431	0.00487137	8.42084e-09	0.0660735
C39H74O5	DG (R1CO2H+R2CO2H=36:1)	622.556	623.562	27.723	72.06	1	82890	0.00230169	3.69716e-09	0.0290095
C41H76O5	DG (R1CO2H+R2CO2H=38:2)	648.571	649.577	28.355	82.91	2	232422	0.00645389	9.95095e-09	0.0780794	0.173162	DAG
C17H32O2	FA	268.24	269.247	28.172	98.37	1	1211565	0.0336427	1.2542e-07	0.984102
C18H34O2	FA	282.255	283.262	25.759	97.87	1	364735	0.010128	3.58823e-08	0.281548
C16H30O2	FA	254.224	255.231	28.854	97.25	1	495730	0.0137654	5.41469e-08	0.424859
C20H38O2	FA	310.286	311.294	28.172	96.95	1	2015176	0.0559574	1.80341e-07	1.41503
C14H28O2	FA	228.208	229.215	28.022	84.15	0	327382	0.00909074	3.98353e-08	0.312565
C15H28O2	FA	240.208	241.215	25.692	80.36	1	41154	0.00114276	4.75739e-09	0.0373285
C14H26O2	FA	226.194	227.202	19.352	76.15	1	953845	0.0264864	1.17096e-07	0.918782	4.37422	FA
C46H88O11	GlcADAG	816.632	817.64	28.022	96.69	0	842188	0.0233859	2.8637e-08	0.224698
C44H84O11	GlcADAG	788.598	789.607	29.137	77.8	0	1023847	0.0284302	3.60515e-08	0.282876	0.507573	DAG
C72H140O8	GMM alpha'	1133.05	1134.06	20.733	74.6	1	577048	0.0160235	1.41418e-08	0.110963	0.110963	GMM alpha'
C66H114N4O17	GPL-I	1234.82	1235.82	28.005	99.06	0	1279186	0.0355204	2.87657e-08	0.225708
C67H116N4O17	GPL-I	1248.83	1249.84	30.185	98.55	0	2064724	0.0573332	4.59094e-08	0.360225
C69H114N4O17	GPL-I	1270.82	1271.82	30.119	98.1	3	17685628	0.491094	3.8644e-07	3.03217
C68H112N4O17	GPL-I	1256.8	1257.81	28.022	94.37	3	898156	0.02494	1.9844e-08	0.155705
C69H118N4O17	GPL-I	1274.85	1275.85	28.022	93.89	1	300778	0.008352	6.55137e-09	0.0514048
C72H118N4O17	GPL-I	1310.85	1311.85	34.712	93.08	4	1815885	0.0504235	3.84664e-08	0.301823
C70H114N4O17	GPL-I	1282.82	1283.82	30.751	92.61	4	5862730	0.162796	1.26905e-07	0.995754
C71H116N4O17	GPL-I	1296.83	1297.84	29.137	92.61	4	369003	0.0102465	7.90116e-09	0.0619959
C66H108N4O17	GPL-I	1228.77	1229.77	29.487	90.77	3	2215769	0.0615274	5.00725e-08	0.39289
C67H110N4O17	GPL-I	1242.78	1243.79	35.278	90.56	3	797004	0.0221312	1.78077e-08	0.139727
C71H122N4O17	GPL-I	1302.88	1303.89	32.532	86.53	1	164138	0.00455778	3.49824e-09	0.0274487
C75H128N4O17	GPL-I	1356.92	1357.93	31.667	83.95	2	1203233	0.0334114	2.46229e-08	0.193202
C70H116N4O17	GPL-I	1284.83	1285.84	35.677	83.61	3	3625186	0.100664	7.83482e-08	0.614753
C70H120N4O17	GPL-I	1288.86	1289.87	35.66	74.9	1	1449610	0.0402527	3.12313e-08	0.245054
C77H132N4O17	GPL-I	1384.95	1385.96	34.828	71.56	2	18878	0.000524204	3.78499e-10	0.00296987
C76H132N4O17	GPL-I	1372.96	1373.97	33.63	70.75	1	223667	0.00621078	4.52365e-09	0.0354945	6.83633	GPL I
C62H104N4O15	GPL-IIa/IV	1144.75	1145.75	29.42	74.86	3	708837	0.019683	1.71942e-08	0.134913
C64H106N4O15	GPL-IIa/IV	1170.76	1171.77	29.137	73.37	4	1442434	0.0400535	3.42115e-08	0.268438
C62H108N4O15	GPL-IIa/IV	1148.78	1149.79	29.12	71.33	1	822139	0.0228291	1.98726e-08	0.155929	0.55928	GPL IIa/IV
C78H130N4O21	GPL-IIb	1458.92	1459.93	30.485	92.39	3	2968357	0.0824253	5.64975e-08	0.443303
C73H118N4O21	GPL-IIb	1386.84	1387.84	30.585	72.77	4	617006	0.017133	1.2354e-08	0.0969349
C79H130N4O21	GPL-IIb	1470.93	1471.94	28.022	70.77	4	29609	0.000822182	5.58954e-10	0.00438579	0.544624	GPL IIb
C76H126N4O20	GPL-IIIa	1414.89	1415.9	30.535	91.59	2	3327562	0.0923997	6.53051e-08	0.512411
C69H114N4O20	GPL-IIIa	1318.81	1319.81	30.069	86.16	1	139435	0.00387183	2.93586e-09	0.023036
C71H114N4O20	GPL-IIIa	1342.8	1343.81	30.102	79.25	3	221469	0.00614975	4.57979e-09	0.035935
C80H130N4O20	GPL-IIIa	1466.93	1467.93	29.353	78.87	4	62100	0.00172439	1.17551e-09	0.00922357
C79H130N4O20	GPL-IIIa	1454.92	1455.93	22.381	77.59	3	56282	0.00156284	1.07417e-09	0.00842843	0.589034	GPL IIIa
C72H122N4O19	GPL-serovar 1	1346.87	1347.88	34.196	88.5	3	3340870	0.0927692	6.88774e-08	0.540441
C70H124N4O19	GPL-serovar 1	1324.89	1325.9	34.263	83.44	0	1677460	0.0465797	3.51574e-08	0.27586
C67H116N4O19	GPL-serovar 1	1280.82	1281.83	22.164	71.37	1	44707	0.00124142	9.69239e-10	0.00760506	0.823906	GPL s1
C79H130N4O24	GPL-serovar 2	1518.91	1519.92	30.468	81.14	4	367213	0.0101968	6.71319e-09	0.0526746
C84H142N4O24	GPL-serovar 2	1590.99	1592	30.252	80.22	3	505875	0.0140471	8.82915e-09	0.0692773	0.121952	GPL s2
C83H138N4O26	GPL-serovar 8	1606.96	1607.97	30.302	74.29	3	72523	0.00201382	1.25318e-09	0.00983299	0.00983299	GPL s8
C75H135N4O19	GPL-V/VI	1395.98	1396.99	31.084	77.9	0	141414	0.00392678	2.81292e-09	0.0220714
C70H125N4O19	GPL-V/VI	1325.89	1326.9	34.263	75.19	0	1202248	0.033384	2.51785e-08	0.197561
C72H123N4O19	GPL-V/VI	1347.88	1348.89	34.196	73.7	3	2323335	0.0645143	4.78636e-08	0.375558	0.595191	GPL V/VI
C25H50O3	HPA	398.377	399.386	30.169	80.95	0	38358	0.00106512	2.67366e-09	0.0209787	0.0209787	HPA
C16H31O7P	LPA	366.181	367.188	26.491	96.81	1	415875	0.011548	3.15363e-08	0.247448
C30H61O7P	LPA	564.418	565.425	28.804	84.52	0	2131658	0.0591918	1.04872e-07	0.822873
C18H37O7P	LPA	396.23	397.237	30.735	80.1	0	89239	0.00247799	6.25391e-09	0.0490708
C28H57O7P	LPA	536.388	537.395	32.698	78.27	0	42466680	1.17921	2.19844e-06	17.2499
C17H35O7P	LPA	382.215	383.222	30.152	77.78	0	2177498	0.0604647	1.58196e-07	1.24127
C28H55O7P	LPA	534.367	535.375	32.232	75.97	1	130942	0.003636	6.8043e-09	0.0533895
C21H41O7P	LPA	436.259	437.266	28.937	75.33	1	55973	0.00155426	3.56269e-09	0.0279544
C24H47O7P	LPA	478.305	479.314	24.111	74.77	1	1206191	0.0334935	7.00253e-08	0.549448
C23H47O7P	LPA	466.307	467.315	29.952	71.9	0	36017	0.00100012	2.14476e-09	0.0168287	20.2582	LPA
C27H56NO7P	LPE	537.378	538.385	31.051	81.78	0	103543	0.00287518	5.35039e-09	0.0419814	0.0419814	LPE
C28H55O9P	LPG	566.356	567.364	15.408	87.14	1	1277149	0.0354639	6.26176e-08	0.491324
C27H55O9P	LPG	554.355	555.363	15.741	81.55	0	194840	0.00541031	9.75965e-09	0.0765784
C20H39O9P	LPG	454.233	455.24	28.904	78.73	1	58147	0.00161462	3.55462e-09	0.027891
C28H57O9P	LPG	568.377	569.385	35.627	76.11	0	311230	0.00864223	1.52051e-08	0.119306	0.715099	LPG
C22H41O12P	LPI	528.234	529.241	23.546	92.11	1	35931	0.000997731	1.8888e-09	0.0148204
C30H57O12P	LPI	640.358	641.366	24.611	89.31	1	3498368	0.0971426	1.51701e-07	1.19031
C34H65O12P	LPI	696.425	697.432	30.635	77.37	1	2553953	0.0709181	1.01832e-07	0.799015
C31H59O12P	LPI	654.375	655.381	14.126	70.39	1	22894	0.00063572	9.71493e-10	0.00762275	2.01176	LPI
C21H44NO7P	Lyso-PE (R1CO2H=16:0)	453.285	454.292	23.462	97.35	0	1026257	0.0284971	6.2868e-08	0.493289
C21H42NO7P	Lyso-PE (R1CO2H=16:1)	451.269	452.276	21.515	80.56	1	340727	0.0094613	2.0966e-08	0.164508
C23H46NO7P	Lyso-PE (R1CO2H=18:1)	479.302	480.31	24.211	93.16	1	328406	0.00911917	1.9026e-08	0.149286	0.807083	LPE
C22H45O9P	Lyso-PG (RCO2H=16:0)	484.281	485.288	28.754	71.39	0	19244	0.000534367	1.10342e-09	0.00865794	0.00865794	LPG
C25H49O12P	Lyso-PI (RCO2H=16:0)	572.295	573.303	18.27	77.79	0	34739	0.000964632	1.68555e-09	0.0132255
C28H53O12P	Lyso-PI (RCO2H=19:1)	612.332	613.339	13.178	76.36	1	341876	0.00949321	1.55034e-08	0.121646	0.134872	LPI
C31H59O17P	Lyso-PIM1 (RCO2H=16:0)	734.348	735.355	18.603	72.06	0	34795	0.000966187	1.31571e-09	0.0103236
C31H59O17P	Lyso-PIM1 (RCO2H=16:0)	734.348	735.355	18.603	72.06	0	34795	0.000966187	1.31571e-09	0.0103236
C32H61O17P	Lyso-PIM1 (RCO2H=17:0)	748.363	749.371	24.294	86.76	0	33116	0.000919565	1.22877e-09	0.00964143	0.0302886	LPIM1
C46H83O27P	Lyso-PIM3 (RCO2H=19:1)	1098.49	1099.49	28.571	81.35	1	53666	0.0014902	1.35659e-09	0.0106444	0.0106444	LPIM3
C16H32O4	MAG	288.231	289.238	13.893	84.03	0	195080	0.00541698	1.87939e-08	0.147465
C22H42O4	MAG	370.308	371.315	31.933	83.71	1	50405	0.00139965	3.77968e-09	0.029657
C31H62O4	MAG	498.466	499.473	33.83	79.96	0	484679	0.0134586	2.69999e-08	0.211853
C15H30O4	MAG	274.213	275.22	23.812	71.3	0	16569	0.000460088	1.67785e-09	0.0131651	0.40214	MAG
C44H69N5O10	Mbt -Fe (R=17:1)	827.508	828.516	13.194	75.05	1	129224	0.00358829	4.33626e-09	0.0340241
C46H73N5O10	Mbt -Fe (R=19:1)	855.54	856.547	14.592	72.42	1	87803	0.00243811	2.84979e-09	0.0223607
C48H77N5O9	Mdmycobactins	867.571	868.579	30.019	84.94	1	406174	0.0112786	1.30002e-08	0.102005
C44H69N5O9	Mdmycobactins	811.514	812.52	14.443	75.14	1	201161	0.00558584	6.88323e-09	0.0540088	0.212399	mycobactin
C17H34O4	MG (RCO2H=14:0)	302.246	303.254	14.176	95.33	0	625644	0.0173729	5.74792e-08	0.451006
C18H36O4	MG (RCO2H=15:0)	316.262	317.269	15.458	85.48	0	232614	0.00645922	2.04237e-08	0.160253
C18H34O4	MG (RCO2H=15:1)	314.245	315.252	29.004	91.62	1	280102	0.00777787	2.4751e-08	0.194207
C19H38O4	MG (RCO2H=16:0)	330.276	331.283	29.137	91.46	0	608628	0.0169004	5.11705e-08	0.401505
C20H40O4	MG (RCO2H=17:0)	344.293	345.3	26.474	82.65	0	20398	0.000566411	1.64514e-09	0.0129085
C21H40O4	MG (RCO2H=18:1)	356.292	357.3	31.7	82.54	1	36705	0.00101922	2.86064e-09	0.0224458
C24H48O4	MG (RCO2H=21:0)	400.356	401.363	25.676	88.28	0	46774	0.00129882	3.24416e-09	0.0254551	1.26778	MAG
C57H103O10	Mono PGL-B1	947.75	948.758	30.901	82.46	0	975119	0.0270771	2.85698e-08	0.224171
C69H127O10	Mono PGL-B1	1115.94	1116.95	35.494	76.09	0	344807	0.00957459	8.57982e-09	0.0673209	0.291492	PGL
C48H77N5O10	mycobactins	883.571	884.579	30.136	73.93	1	106347	0.00295304	3.34217e-09	0.0262241	0.0262241	mycobactin
C16H32O2	mycosanoic acids	256.24	257.248	27.723	75.45	0	137245	0.00381102	1.48729e-08	0.116699	0.116699	FA
C34H65O8P	PA	632.443	633.451	29.753	86.16	1	193970	0.00538616	8.51643e-09	0.0668235
C64H125O8P	PA	1052.91	1053.92	31.866	82.85	1	50909	0.00141364	1.3426e-09	0.0105346
C65H127O8P	PA	1066.93	1067.93	31.866	78.41	1	14450	0.000401247	3.76078e-10	0.00295087
C28H51O8P	PA	546.33	547.337	26.824	75.42	2	990196	0.0274957	5.03281e-08	0.394895
C31H57O8P	PA	588.383	589.39	23.795	73.09	2	481556	0.0133718	2.27264e-08	0.178321
C32H61O8P	PA	604.41	605.418	24.611	73.01	1	14867881	0.412851	6.83064e-07	5.35961
C27H51O8P	PA	534.331	535.338	27.955	73	1	570349	0.0158374	2.96397e-08	0.232566
C28H55O8P	PA	550.364	551.372	32.615	72.1	0	44189	0.00122704	2.2295e-09	0.0174936
C41H81O8P	PA	732.564	733.568	30.136	71.65	0	20819	0.000578102	7.89148e-10	0.00619199	6.26939	PA
C29H54NO8P	PE	575.358	576.366	13.511	86.35	2	213914	0.00593996	1.03239e-08	0.081006
C52H100NO8P	PE	897.717	898.722	31.217	71.77	2	88201	0.00244916	2.72821e-09	0.0214067
C37H70NO8P	PE (R1CO2H+R2CO2H=32:2)	687.481	688.487	31.833	70.73	2	218355	0.00606328	8.81956e-09	0.069202
C39H74NO8P	PE (R1CO2H+R2CO2H=34:2)	715.514	716.525	29.586	77.31	2	1710317	0.0474921	6.63747e-08	0.520805	0.692419	PE
C32H63O10P	PG	638.418	639.425	28.405	74.13	0	570453	0.0158403	2.48118e-08	0.194684
C68H135O10P	PG	1142.98	1144	35.211	72.77	0	121580	0.00337603	2.9537e-09	0.023176
C36H69O10P	PG (R1CO2H+R2CO2H=30:1)	692.463	693.47	24.477	72.51	1	13011143	0.361293	5.21751e-07	4.09388
C49H95O10P	PG (R1CO2H+R2CO2H=43:1)	874.671	875.68	31.217	72.4	1	139369	0.00387	4.42451e-09	0.0347166	4.34646	PG
C34H65O13P	PI	712.415	713.423	16.689	97.77	0	5798150	0.161003	2.25996e-07	1.77326
C69H135O13P	PI	1202.97	1203.97	32.648	93.24	0	348009	0.00966351	8.03307e-09	0.0630309
C35H65O13P	PI	724.416	725.423	28.971	89.84	1	56867	0.00157908	2.1798e-09	0.0171036
C36H65O13P	PI	736.418	737.423	29.204	81.55	2	55917	0.0015527	2.10845e-09	0.0165438
C38H69O13P	PI	764.446	765.452	14.326	81.27	2	25522	0.000708694	9.27069e-10	0.00727418
C36H69O13P	PI	740.451	741.458	30.435	80.54	0	2496202	0.0693145	9.36112e-08	0.734514
C57H107O13P	PI	1030.75	1031.76	28.421	76.47	2	80599	0.00223807	2.17131e-09	0.017037
C55H107O13P	PI	1006.74	1007.75	28.022	70.39	0	385090	0.0106932	1.06215e-08	0.0833411
C39H75O13P	PI (R1CO2H+R2CO2H=30:0)	782.495	783.501	32.432	79.11	0	85495	0.00237402	3.03392e-09	0.0238054
C41H77O13P	PI (R1CO2H+R2CO2H=32:1)	808.511	809.517	35.81	70.25	1	88176	0.00244847	3.02837e-09	0.0237619
C41H75O13P	PI (R1CO2H+R2CO2H=32:2)	806.49	807.498	30.252	73.31	2	4794085	0.133122	1.65063e-07	1.29516	4.05483	PI
C47H89O18P	PIM1 (R1CO2H+R2CO2H=32:0)	972.58	973.587	26.624	83.12	0	403573	0.0112064	1.15223e-08	0.0904093
C51H93O18P	PIM1 (R1CO2H+R2CO2H=36:2)	1024.61	1025.62	32.199	86.98	2	85637	0.00237797	2.32085e-09	0.0182104
C52H95O18P	PIM1 (R1CO2H+R2CO2H=37:2)	1038.62	1039.63	32.166	88.41	2	124160	0.00344767	3.31947e-09	0.0260459	0.134666	PIM1
C58H109O23P	PIM2 (R1CO2H+R2CO2H=37:0)	1204.71	1205.71	24.228	85.29	0	23224	0.000644884	5.35303e-10	0.00420022
C58H105O23P	PIM2 (R1CO2H+R2CO2H=37:2)	1200.68	1201.68	24.444	88.86	2	77579	0.00215421	1.79417e-09	0.0140778	0.018278	PIM2
C39H68O6	TAG	632.499	633.506	30.102	86.81	3	4607452	0.12794	2.02277e-07	1.58715
C39H70O6	TAG	634.516	635.521	28.005	82.54	2	94896	0.00263507	4.15288e-09	0.0325853
C43H76O6	TAG	688.561	689.568	33.863	81.52	3	1087582	0.0302	4.38595e-08	0.344141
C40H74O6	TAG	650.548	651.554	35.544	77.97	1	304970	0.0084684	1.30173e-08	0.10214	2.06601	TAG
C53H94O14	TAT	954.665	955.67	31.234	71.17	2	115872	0.00321753	3.37033e-09	0.026445	0.026445	TAT
C53H96O6	TG (R1CO2H+R2CO2H+R3CO2H=50:3)	828.725	829.733	31.001	72.85	3	108558	0.00301444	3.63744e-09	0.0285409	0.0285409	TAG
									1.27447e-05	100	100
									1.27447e-05
